# Supplementary material
Source: PubMed Central journal article supplement (PMC10546292)
Supplement: jamaneurol-e233344-s001.pdf [file jamaneurol-e233344-s001.pdf]

## Supplementary Online Content

Lavallée PC, Charles H, Albers GW, et al; TIARegistry.org Investigators. Underlying causes of TIA and minor ischemic stroke and risk of major vascular events. *JAMA Neurol*. Published online October 2, 2023. doi:10.1001/jamaneurol.2023.3344

**eTable 1.** Univariate Comparison Between Baseline Characteristics and ASCOD Grades A1-A2 vs A0, S0, C0, O0, or D0

**eTable 2.** Univariate Comparison Between Baseline Characteristics and ASCOD Grades A1-A2 and A3 vs A0, S0, C0, O0, or D0

**eTable 3.** Baseline Characteristics According to ASCOD Grading System S (Small Vessel Disease)

**eTable 4.** Univariate Comparison Between Baseline Characteristics and ASCOD Grades S1-S2 vs S0

**eTable 5.** Multivariable Association Between Baseline Characteristics and ASCOD Grades S1-S2 vs S0

**eTable 6.** Univariate Comparison Between Baseline Characteristics and ASCOD Grades S1-S2 and S3 vs S0

**eTable 7.** Multivariable Association Between Baseline Characteristics and ASCOD Grades S1-S2 and S3 vs S0

**eTable 8.** Univariate Comparison Between Baseline Characteristics and ASCOD Grades S1-S2 vs A0, S0, C0, O0, and D0

**eTable 9.** Univariate Comparison Between Baseline Characteristics and ASCOD Grades S1-S2 and S3 vs A0, S0, C0, O0, and D0

**eTable 10.** Baseline Characteristics According to ASCOD Grading System C (Cardiac Pathology)

**eTable 11.** Five-Year Event Rates According to ASCOD Classification C (Cardiac Pathology)

**eTable 12.** Effect Sizes Associated With ASCOD Classification C1-C2 and C3 Compared With C0

**eTable 13.** Univariate Comparison Between Baseline Characteristics and ASCOD Grades C1-C2 vs C0

**eTable 14.** Multivariable Association Between Baseline Characteristics and ASCOD Grades C1-C2 vs C0

**eTable 15.** Univariate Comparison Between Baseline Characteristics and ASCOD Grades C1-C2 and C3 vs C0

**eTable 16.** Multivariable Association Between Baseline Characteristics and ASCOD Grades C1-C2 and C3 vs C0

**eTable 17.** Univariate Comparison Between Baseline Characteristics and ASCOD Grades C1- C2 vs A0, S0, C0, O0, and D0

**eTable 18.** Univariate Comparison Between Baseline Characteristics and ASCOD Grades C1-C2 and C3 vs A0, S0, C0, O0, and D0

**eTable 19.** Baseline Characteristics According to ASCOD Grading System OD (Other Cause and Dissection)

**eTable 20.** Five-Year Event Rates According to ASCOD Grades (Other Causes and Dissection)

**eTable 21.** Effect Sizes Associated With ASCOD Grades O1-D1 or O2-D2 and O3-O3 Compared With O0-D0

**eTable 22.** Univariate Comparison Between Baseline Characteristics and ASCOD Grades O1-1 or O2-D2 vs O0-D0

**eTable 23.** Multivariable Association Between Baseline Characteristics and ASCOD Grades O1-D1 or O2-D2 vs ASCOD Grade O0-D0

**eTable 24.** Univariate Comparison Between Baseline Characteristics and ASCOD Grades O1-D1 or O2-D2 or O3-D3 vs O0-D0

**eTable 25.** Multivariable Association Between Baseline Characteristics and ASCOD Grades O1-D1 or O2-D2 or O3-D3 vs O0-D0

**eTable 26.** Univariate Comparison Between Baseline Characteristics and ASCOD Grades O1-D1 or O2-D2 vs A0, S0, C0, O0, and D0

**eTable 27.** Univariate Comparison Between Baseline Characteristics and ASCOD Grades O1-D1 or O2-D2 or O3-D3 vs A0, S0, C0, O0, or D0

**eTable 28.** Five-Year Event Rates and Effect Sizes According to ASCOD Cross-Grades

**eTable 29.** Multivariable Association Between Baseline Characteristics and ASCOD Grades A1-A2 and A1-A2 and A3 vs A0, S0, C0, O0, or D0

**eTable 30.** Multivariable Association Between Baseline Characteristics and ASCOD Grades S1-S2 and S1-S2 and S3 vs A0, S0, C0, O0, or D0

**eTable 31.** Multivariable Association Between Baseline Characteristics and ASCOD Grades C1-C2 and C1-C2 and C3 vs A0, S0, C0, O0, or D0

**eFigure 1.** Study Flowchart

**eFigure 2.** Venn Diagram Among Main ASCOD Diseases (Atherosclerosis, Small Vessel Disease, and Cardiac Pathology)

**eFigure 3.** Five-Year Cumulative Incidence of Recurrent Major Cardiovascular Event According to ASCOD Grades S0, S1-S2, and S3

**eFigure 4.** LDL and Blood Pressure Evolution: Small Vessel Disease

**eFigure 5.** Five-Year Cumulative Incidence of Recurrent Major Cardiovascular Event According to ASCOD Grades C0, C1-C2, and C3

**eFigure 6.** LDL and Blood Pressure Evolution: Cardiac Pathology

**eFigure 7.** Five-Year Cumulative Incidence of Recurrent Major Cardiovascular Event According to ASCOD Grades O0-D0, O1-D1, or O2-D2 and O3-D3

**eFigure 8.** LDL and Blood Pressure Evolution: Other Causes and Dissection

**eFigure 9.** Five-Year Cumulative Incidence of Recurrent Major Cardiovascular Event According to ASCOD Grades A1-A2 and A3, S1-S2 and S3, C1-C2 and C3, O1-O2 and O3, D1-D2 and D3, and A0, S0, C0, O0, or D0

**eMethods 1.** ASCOD Phenotyping: Method of Classification

**eMethods 2.** Grades of Predefined ASCOD Phenotypes

This supplementary material has been provided by the authors to give readers additional information about their work.

**eTable 1.** Univariate Comparison Between Baseline Characteristics and ASCOD Grades A1-A2 vs A0, S0, C0, O0, or D0

|                                                                      | <b>A0/S0/C0/OD0<br/>(n=484)</b> | <b>A1/A2<br/>(n=998)</b> | <b>P-value</b> |
|----------------------------------------------------------------------|---------------------------------|--------------------------|----------------|
| Age-yr, mean (SD)                                                    | 58.4 (14.7)                     | 69.8 (12.0)              | <0.001         |
| Male sex - no/total no, (%)                                          | 250/482 (51.9)                  | 658/997 (66.0)           | <0.001         |
| Ethnicity                                                            |                                 |                          | <0.001         |
| Asian                                                                | 80/484 (16.5)                   | 710/998 (71.1)           |                |
| Non-Asian                                                            | 404/484 (83.5)                  | 288/998 (28.9)           |                |
| Qualifying event                                                     |                                 |                          | <0.001         |
| Stroke                                                               | 106/432 (24.5)                  | 481/988 (48.7)           |                |
| TIA                                                                  | 326/432 (75.5)                  | 507/988 (51.3)           |                |
| <b>Medical history - no/total no, (%)</b>                            |                                 |                          |                |
| Hypertension                                                         | 240/481 (49.9)                  | 803/997 (80.5)           | <0.001         |
| Diabetes                                                             | 59/480 (12.3)                   | 241/996 (24.2)           | <0.001         |
| Dyslipidemia                                                         | 287/448 (59.3)                  | 806/998 (80.8)           | <0.001         |
| Smoke - no/total no, (%)                                             |                                 |                          | <0.001         |
| Never                                                                | 273/475 (57.5)                  | 464/988 (47.0)           |                |
| Former                                                               | 93/475 (19.6)                   | 284/988 (28.7)           |                |
| Current                                                              | 109/475 (22.9)                  | 240/988 (24.3)           |                |
| Regular alcohol consumption                                          | 75/477 (15.7)                   | 248/984 (25.2)           | <0.001         |
| Regular physical activity                                            | 148/467 (31.7)                  | 180/974 (18.5)           | <0.001         |
| Stroke or TIA                                                        | 46/484 (9.5)                    | 204/998 (20.4)           | <0.001         |
| Coronary artery disease                                              | 0/480 (0.0)                     | 184/995 (18.5)           | <0.001         |
| Peripheral artery disease                                            | 0/474 (0.0)                     | 56/996 (5.6)             | <0.001         |
| Atrial fibrillation or flutter                                       | 4/482 (0.8)                     | 96/995 (9.7)             | <0.001         |
| Congestive heart failure                                             | 0/482 (0.0)                     | 33/995 (3.3)             | <0.001         |
| Clinically significant valvular disease<br>or prosthetic heart valve | 3/484 (0.6)                     | 28/998 (2.8)             | 0.006          |
| Atherosclerotic dyslipidemia <sup>(1)</sup>                          | 28/349 (8.0)                    | 90/868 (10.4)            | 0.21           |
| Atherosclerotic dyslipidemia <sup>(2)</sup>                          | 67/349 (19.2)                   | 198/869 (22.8)           | 0.17           |
| Diabetes and Atherosclerotic<br>dyslipidemia <sup>(2)</sup>          | 15/482 (3.1)                    | 73/997 (7.3)             | 0.001          |
| Body-mass index, mean (SD)                                           | 26.4 (4.7)                      | 25.9 (4.4)               | 0.039          |
| <b>Blood pressure-mm Hg</b>                                          |                                 |                          |                |
| Systolic, mean (SD)                                                  | 140 (22)                        | 149 (23)                 | <0.001         |
| Diastolic, mean (SD)                                                 | 81 (12)                         | 80 (13)                  | 0.63           |
| Glucose-mg/dl, median (IQR)                                          | 99 (90-121)                     | 104 (90-135)             | 0.058          |
| <b>Cholesterol- mg/dl</b>                                            |                                 |                          |                |
| LDL, mean (SD)                                                       | 125 (42)                        | 118 (45)                 | 0.011          |
| HDL, mean (SD)                                                       | 53 (19)                         | 49 (16)                  | 0.002          |
| Triglyceride, median(IQR), mg/dl                                     | 115.0 (82.0-161.0)              | 119.0 (88.0-<br>163.0)   | 0.12           |
| <b>Socio-economic factors - no/total no,<br/>(%)</b>                 |                                 |                          |                |
| Living alone                                                         | 145/468 (31.0)                  | 337/990 (34.0)           | 0.25           |
| Living in rural area                                                 | 51/465 (11.0)                   | 96/991 (9.7)             | 0.45           |

|                              |                 |                |        |
|------------------------------|-----------------|----------------|--------|
| Unemployed                   | 35/459 (7.6)    | 56/975 (5.7)   | 0.17   |
| Educational level            |                 |                | 0.063  |
| No education                 | 14/434 (3.2)    | 42/959 (4.4)   |        |
| Primary education            | 113/434 (26.0)  | 284/959 (29.6) |        |
| Secondary education          | 206/434 (47.5)  | 464/959 (48.4) |        |
| Tertiary education           | 101/424 (23.3)  | 169/959 (17.6) |        |
| TOAST classification         |                 |                | <0.001 |
| Large artery atherosclerosis | 54/395 (13.7)   | 469/944 (49.7) |        |
| Small vessel disease         | 0/395 (0.0)     | 107/944 (11.3) |        |
| Cardioembolism               | 0/395 (0.0)     | 116/944 (12.3) |        |
| Other determined cause       | 0/395 (0.0)     | 41/944 (4.3)   |        |
| Undetermined                 | 341/395 (86.3)  | 211/944 (22.4) |        |
| ABCD2 score                  |                 |                | <0.001 |
| 0-3                          | 208/418 (49.8)  | 233/911 (25.6) |        |
| 4-5                          | 164/418 (39.2)  | 461/911 (50.6) |        |
| 6-7                          | 46/418 (11.0)   | 217/911 (23.8) |        |
| Acute infarction             |                 |                | <0.001 |
| No                           | 322/432 (74.5)  | 447/988 (45.2) |        |
| Single                       | 81/432 (18.8)   | 295/988 (29.9) |        |
| Multiple                     | 29/432 (6.7)    | 246/988 (24.9) |        |
| PICO's score                 |                 |                | <0.001 |
| 0                            | 484/484 (100.0) | 549/998 (55.0) |        |
| 1                            | 0/484 (0.0)     | 381/998 (38.2) |        |
| ≥2                           | 0/484 (0.0)     | 68/998 (6.8)   |        |

**eTable 2.** Univariate Comparison Between Baseline Characteristics and ASCOD Grades A1-A2 and A3 vs A0, S0, C0, O0, or D0

|                                                                      | <b>A0/S0/C0/OD0<br/>(n=484)</b> | <b>A1/A2 and A3<br/>(n=2106)</b> | <b>P-value</b> |
|----------------------------------------------------------------------|---------------------------------|----------------------------------|----------------|
| Age-yr, mean (SD)                                                    | 58.4 (14.7)                     | 69.3 (11.5)                      | <0.001         |
| Male sex - no/total no, (%)                                          | 250/482 (51.9)                  | 1332/2104 (63.3)                 | <0.001         |
| Ethnicity                                                            |                                 |                                  | 0.001          |
| Asian                                                                | 80/484 (16.5)                   | 1607/2106 (76.3)                 |                |
| Non-Asian                                                            | 404/484 (83.5)                  | 499/2106 (23.7)                  |                |
| Qualifying event                                                     |                                 |                                  | <0.001         |
| Stroke                                                               | 106/432 (24.5)                  | 966/2072 (46.6)                  |                |
| TIA                                                                  | 326/432 (75.5)                  | 1106/2072 (53.4)                 |                |
| <b>Medical history - no/total no, (%)</b>                            |                                 |                                  |                |
| Hypertension                                                         | 240/481 (49.9)                  | 1674/2104 (79.6)                 | <0.001         |
| Diabetes                                                             | 59/480 (12.3)                   | 462/2100 (22.0)                  | <0.001         |
| Dyslipidemia                                                         | 287/448 (59.3)                  | 1634/2106 (77.6)                 | <0.001         |
| Smoke - no/total no, (%)                                             |                                 |                                  | <0.001         |
| Never                                                                | 273/475 (57.5)                  | 1006/2084 (48.3)                 |                |
| Former                                                               | 93/475 (19.6)                   | 604/2084 (29.0)                  |                |
| Current                                                              | 109/475 (22.9)                  | 474/2084 (22.7)                  |                |
| Regular alcohol consumption                                          | 75/477 (15.7)                   | 496/2078 (23.9)                  | <0.001         |
| Regular physical activity                                            | 148/467 (31.7)                  | 401/2057 (19.5)                  | <0.001         |
| Stroke or TIA                                                        | 46/484 (9.5)                    | 413/2103 (19.6)                  | <0.001         |
| Coronary artery disease                                              | 0/480 (0.0)                     | 481/2102 (22.9)                  | <0.001         |
| Peripheral artery disease                                            | 0/474 (0.0)                     | 113/2101 (5.4)                   | <0.001         |
| Atrial fibrillation or flutter                                       | 4/482 (0.8)                     | 219/2101 (10.4)                  | <0.001         |
| Congestive heart failure                                             | 0/482 (0.0)                     | 76/2100 (3.6)                    | <0.001         |
| Clinically significant valvular disease<br>or prosthetic heart valve | 3/484 (0.6)                     | 71/2106 (3.4)                    | 0.001          |
| Atherosclerotic dyslipidemia <sup>(1)</sup>                          | 28/349 (8.0)                    | 171/1787 (9.6)                   | 0.36           |
| Atherosclerotic dyslipidemia <sup>(2)</sup>                          | 67/349 (19.2)                   | 395/1789 (22.1)                  | 0.23           |
| Diabetes and Atherosclerotic<br>dyslipidemia <sup>(2)</sup>          | 15/482 (3.1)                    | 136/2103 (6.5)                   | 0.005          |
| Body-mass index, mean (SD)                                           | 26.4 (4.7)                      | 26.3 (4.5)                       | 0.55           |
| <b>Blood pressure-mm Hg</b>                                          |                                 |                                  |                |
| Systolic, mean (SD)                                                  | 140 (22)                        | 148 (23)                         | <0.001         |
| Diastolic, mean (SD)                                                 | 81 (12)                         | 81 (13)                          | 0.66           |
| Glucose-mg/dl, median (IQR)                                          | 99 (90-121)                     | 105 (92-133)                     | 0.11           |
| <b>Cholesterol- mg/dl</b>                                            |                                 |                                  |                |
| LDL, mean (SD)                                                       | 125 (42)                        | 118 (42)                         | 0.006          |
| HDL, mean (SD)                                                       | 53 (19)                         | 50 (16)                          | 0.004          |
| Triglyceride, median(IQR), mg/dl                                     | 115.0 (82.0-161.0)              | 119.0 (88.0-<br>164.0)           | 0.11           |
| <b>Socio-economic factors - no/total no,<br/>(%)</b>                 |                                 |                                  |                |
| Living alone                                                         | 145/468 (31.0)                  | 734/2079 (35.3)                  | 0.076          |
| Living in rural area                                                 | 51/465 (11.0)                   | 213/2088 (10.2)                  | 0.62           |

|                              |                 |                  |        |
|------------------------------|-----------------|------------------|--------|
| Unemployed                   | 35/459 (7.6)    | 89/2050 (4.3)    | 0.003  |
| Educational level            |                 |                  | 0.012  |
| No education                 | 14/434 (3.2)    | 80/1987 (4.0)    |        |
| Primary education            | 113/434 (26.0)  | 604/1987 (30.4)  |        |
| Secondary education          | 206/434 (47.5)  | 967/1987 (48.7)  |        |
| Tertiary education           | 101/424 (23.3)  | 336/1987 (16.9)  |        |
| TOAST classification         |                 |                  | <0.001 |
| Large artery atherosclerosis | 54/395 (13.7)   | 724/1999 (36.2)  |        |
| Small vessel disease         | 0/395 (0.0)     | 371/1999 (18.6)  |        |
| Cardioembolism               | 0/395 (0.0)     | 307/1999 (15.4)  |        |
| Other determined cause       | 0/395 (0.0)     | 85/1999 (4.3)    |        |
| Undetermined                 | 341/395 (86.3)  | 512/1999 (25.6)  |        |
| ABCD2 score                  |                 |                  | <0.001 |
| 0-3                          | 208/418 (49.8)  | 535/1913 (28.0)  |        |
| 4-5                          | 164/418 (39.2)  | 921/1913 (48.1)  |        |
| 6-7                          | 46/418 (11.0)   | 457/1913 (23.9)  |        |
| Acute infarction             |                 |                  | <0.001 |
| No                           | 322/432 (74.5)  | 1007/2072 (48.6) |        |
| Single                       | 81/432 (18.8)   | 649/2072 (31.3)  |        |
| Multiple                     | 29/432 (6.7)    | 416/2072 (20.1)  |        |
| PICO's score                 |                 |                  | <0.001 |
| 0                            | 484/484 (100.0) | 1244/2016 (59.1) |        |
| 1                            | 0/484 (0.0)     | 703/2106 (33.4)  |        |
| ≥2                           | 0/484 (0.0)     | 159/2106 (7.5)   |        |

**eTable 3.** Baseline Characteristics According to ASCOD Grading System S (Small Vessel Disease)

|                                                                   | <b>S0</b><br><b>(n=2141)</b> | <b>S1/S2</b><br><b>(n=773)</b> | <b>S3</b><br><b>(n=912)</b> | <b>S9</b><br><b>(n=21)</b> |
|-------------------------------------------------------------------|------------------------------|--------------------------------|-----------------------------|----------------------------|
| Age-yr, mean (SD)                                                 | 63.2 (13.8)                  | 67.0 (11.5)                    | 73.7 (10.0)                 | 61.1 (12.9)                |
| Male sex - no/total no, (%)                                       | 1276/2137 (59.7)             | 464/772 (60.1)                 | 543/911 (59.6)              | 12/21 (57.1)               |
| Ethnicity                                                         |                              |                                |                             |                            |
| Asian                                                             | 445/2141 (20.8)              | 272/773 (35.2)                 | 160/912 (17.5)              | 5/21 (23.8)                |
| Non-Asian                                                         | 1696/2141 (79.2)             | 501/773 (64.8)                 | 752/912 (82.5)              | 16/21 (76.2)               |
| Qualifying event                                                  |                              |                                |                             |                            |
| Stroke                                                            | 741/2021 (36.7)              | 438/764 (57.3)                 | 409/909 (45.0)              | 0/21 (0.0)                 |
| TIA                                                               | 1280/2021 (63.3)             | 326/764 (42.7)                 | 500/909 (55.0)              | 0/21 (0.0)                 |
| <b>Medical history - no/total no, (%)</b>                         |                              |                                |                             |                            |
| Hypertension                                                      | 1364/2132 (64.0)             | 563/773 (72.8)                 | 765/911 (84.0)              | 15/21 (71.4)               |
| Diabetes                                                          | 335/2132 (15.7)              | 189/771 (24.5)                 | 196/909 (21.6)              | 7/20 (35.0)                |
| Dyslipidemia                                                      | 1401/2141 (65.4)             | 590/773 (76.3)                 | 700/912 (76.8)              | 18/21 (85.7)               |
| Smoke - no/total no, (%)                                          |                              |                                |                             |                            |
| Never                                                             | 1107/2118 (52.3)             | 425/756 (56.2)                 | 478/906 (52.8)              | 14/21 (66.7)               |
| Former                                                            | 505/2118 (23.8)              | 148/756 (19.6)                 | 289/906 (31.9)              | 0/21 (0.0)                 |
| Current                                                           | 506/2118 (23.9)              | 183/756 (24.2)                 | 139/906 (15.3)              | 7/21 (33.3)                |
| Regular alcohol consumption                                       | 445/2115 (21.0)              | 141/761 (18.5)                 | 206/904 (22.8)              | 6/21 (28.6)                |
| Regular physical activity                                         | 480/2054 (23.4)              | 119/749 (15.9)                 | 194/888 (21.9)              | 8/21 (38.1)                |
| Stroke or TIA                                                     | 323/2141 (15.1)              | 123/773 (15.9)                 | 207/912 (22.7)              | 5/21 (23.8)                |
| Coronary artery disease                                           | 239/2133 (11.2)              | 73/772 (9.5)                   | 163/907 (18.0)              | 6/21 (28.6)                |
| Peripheral artery disease                                         | 43/2122 (2.0)                | 22/770 (2.9)                   | 48/906 (5.3)                | 0/21 (0.0)                 |
| Atrial fibrillation or flutter                                    | 204/2135 (9.6)               | 15/772 (1.9)                   | 115/908 (12.7)              | 1/21 (4.8)                 |
| Congestive heart failure                                          | 47/2135 (2.2)                | 13/772 (1.7)                   | 48/908 (5.3)                | 1/21 (4.8)                 |
| Clinically significant valvular disease or prosthetic heart valve | 53/2141 (2.5)                | 13/773 (1.7)                   | 39/912 (4.3)                | 0/21 (0.0)                 |
| Atherogenic dyslipidemia <sup>(1)</sup>                           | 147/1684 (8.7)               | 60/637 (9.4)                   | 63/761 (8.3)                | 2/9 (22.2)                 |
| Atherogenic dyslipidemia <sup>(2)</sup>                           | 364/1685 (21.6)              | 144/538 (22.6)                 | 144/761 (18.9)              | 3/9 (33.3)                 |

|                                                          |                    |                    |                    |                    |
|----------------------------------------------------------|--------------------|--------------------|--------------------|--------------------|
| Diabetes and Atherosclerotic dyslipidemia <sup>(2)</sup> | 97/2137 (4.5)      | 51/772 (6.6)       | 47/910 (5.2)       | 2/21 (9.5)         |
| Body-mass index, mean (SD)                               | 26.5 (4.7)         | 26.3 (4.8)         | 26.0 (4.2)         | 27.4 (5.1)         |
| <b>Blood pressure-mm Hg</b>                              |                    |                    |                    |                    |
| Systolic, mean (SD)                                      | 143 (23)           | 152 (25)           | 147 (24)           | 144 (25)           |
| Diastolic, mean (SD)                                     | 81 (13)            | 84 (13)            | 79 (14)            | 82 (13)            |
| Glucose-mg/dl, median (IQR)                              | 102 (90-127)       | 105 (91-130)       | 105 (92-130)       | 147 (92-207)       |
| <b>Cholesterol- mg/dl</b>                                |                    |                    |                    |                    |
| LDL, mean (SD)                                           | 120 (39)           | 124 (41)           | 115 (42)           | 116 (41)           |
| HDL, mean (SD)                                           | 51 (16)            | 51 (16)            | 50 (16)            | 44 (15)            |
| Triglyceride, median(IQR), mg/dl                         | 120.0 (87.0-167.0) | 119.0 (88.0-179.0) | 115.5 (88.0-151.0) | 143.0 (93.0-219.0) |
| <b>Socio-economic factors - no/total no, (%)</b>         |                    |                    |                    |                    |
| Living alone                                             | 606/2095 (28.9)    | 271/751 (36.1)     | 384/906 (42.4)     | 7/21 (33.3)        |
| Living in rural area                                     | 244/2069 (11.8)    | 102/766 (13.3)     | 105/907 (11.6)     | 3/21 (14.3)        |
| Unemployed                                               | 119/2035 (5.9)     | 36/742 (4.9)       | 39/900 (4.3)       | 1/21 (4.8)         |
| Educational level                                        |                    |                    |                    |                    |
| No education                                             | 63/1965 (3.2)      | 39/699 (5.6)       | 57/871 (6.5)       | 0/21 (0.0)         |
| Primary education                                        | 530/1965 (27.0)    | 232/699 (33.2)     | 315/871 (36.2)     | 3/21 (14.3)        |
| Secondary education                                      | 996/1965 (50.7)    | 333/699 (47.6)     | 352/871 (40.4)     | 16/21 (76.2)       |
| Tertiary education                                       | 376/1965 (19.1)    | 95/699 (13.6)      | 147/871 (16.9)     | 2/21 (9.5)         |
| TOAST classification                                     |                    |                    |                    |                    |
| Large artery atherosclerosis                             | 573/1931 (29.7)    | 0/762 (0.0)        | 295/846 (34.9)     | 8/19 (42.1)        |
| Small vessel disease                                     | 0/1931 (0.0)       | 762/762 (100)      | 0/846 (0.0)        | 0/19 (0.0)         |
| Cardioembolism                                           | 382/1931 (19.8)    | 0/762 (0.0)        | 177/846 (20.9)     | 3/19 (15.8)        |
| Other determined cause                                   | 156/1931 (8.1)     | 0/762 (0.0)        | 40/846 (4.7)       | 0/19 (0.0)         |
| Undetermined                                             | 820/1931 (42.5)    | 0/762 (0.0)        | 334/846 (39.5)     | 8/19 (42.1)        |
| ABCD2 score                                              |                    |                    |                    |                    |
| 0-3                                                      | 722/1861 (38.8)    | 145/708 (20.5)     | 224/828 (27.0)     | 12/20 (60.0)       |
| 4-5                                                      | 832/1861 (44.7)    | 358/708 (50.6)     | 447/828 (54.0)     | 4/20 (20.0)        |
| 6-7                                                      | 307/1861 (16.5)    | 205/708 (28.9)     | 157/828 (19.0)     | 4/20 (20.0)        |



|                                           |                      |                |                |               |
|-------------------------------------------|----------------------|----------------|----------------|---------------|
| Acute infarction                          |                      |                |                |               |
| No                                        | 1244/2021 (61.6)     | 299/764 (39.1) | 421/909 (46.3) | 0/21 (0.0)    |
| Single                                    | 493/2021 (24.4)      | 366/764 (47.9) | 266/909 (29.3) | 0/21 (0.0)    |
| Multiple                                  | 284/2021 (14.0)      | 99/764 (13.0)  | 222/909 (24.4) | 0/21 (0.0)    |
| PICO's score                              |                      |                |                |               |
| 0                                         | 2141/2141<br>(100.0) | 392/773 (50.7) | 0/912 (0.0)    | 21/21 (100.0) |
| 1                                         | 0/2141 (0.0)         | 240/773 (31.1) | 821/912 (90.0) | 0/21 (0.0)    |
| ≥2                                        | 0/2141 (0.0)         | 141/773 (18.2) | 91/912 (10.0)  | 0/21 (0.0)    |
| <b>Score at discharge</b>                 |                      |                |                |               |
| NIHSS at discharge                        |                      |                |                |               |
| 0                                         | 1615/1893 (85.3)     | 483/728 (66.4) | 674/835 (80.7) | 18/20 (90.0)  |
| 1-4                                       | 268/1893 (14.2)      | 245/728 (33.6) | 149/835 (17.8) | 2/20 (10.0)   |
| >5                                        | 10/1893 (0.5)        | 0/728 (0.0)    | 12/835 (1.5)   | 0/20 (0.0)    |
| RANKIN at discharge >1 - no/total no, (%) | 28/1902 (1.5)        | 9/743 (1.2)    | 32/840 (3.8)   | 0/20 (0.0)    |

<sup>(1)</sup> Define as triglycerides >200 mg/dL and HDL ≤40 mg/dL for men (HDL ≤50 mg/dL for women);

<sup>(2)</sup> Define as triglycerides >150 mg/dL an HDL ≤50 mg/dL

**eTable 4.** Univariate Comparison Between Baseline Characteristics and ASCOD Grades S1-S2 vs S0

|                                                                      | <b>S0<br/>(n=2141)</b> | <b>S1/S2<br/>(n=773)</b> | <b>P-value</b> |
|----------------------------------------------------------------------|------------------------|--------------------------|----------------|
| Age-yr, mean (SD)                                                    | 63.2 (13.8)            | 67.0 (11.5)              | <0.001         |
| Male sex - no/total no, (%)                                          | 1276/2137 (59.7)       | 464/772 (60.1)           | 0.85           |
| Ethnicity                                                            |                        |                          | <0.001         |
| Asian                                                                | 445/2141 (20.8)        | 272/773 (35.2)           |                |
| Non-Asian                                                            | 1696/2141 (79.2)       | 501/773 (64.8)           |                |
| Qualifying event                                                     |                        |                          | <0.001         |
| Stroke                                                               | 741/2021 (36.7)        | 438/764 (57.3)           |                |
| TIA                                                                  | 1280/2021 (63.3)       | 326/764 (42.7)           |                |
| <b>Medical history - no/total no, (%)</b>                            |                        |                          |                |
| Hypertension                                                         | 1364/2132 (64.0)       | 563/773 (72.8)           | <0.001         |
| Diabetes                                                             | 335/2132 (15.7)        | 189/771 (24.5)           | <0.001         |
| Dyslipidemia                                                         | 1401/2141 (65.4)       | 590/773 (76.3)           | <0.001         |
| Smoke - no/total no, (%)                                             |                        |                          | 0.047          |
| Never                                                                | 1107/2118 (52.3)       | 425/756 (56.2)           |                |
| Former                                                               | 505/2118 (23.8)        | 148/756 (19.6)           |                |
| Current                                                              | 506/2118 (23.9)        | 183/756 (24.2)           |                |
| Regular alcohol consumption                                          | 445/2115 (21.0)        | 141/761 (18.5)           | 0.14           |
| Regular physical activity                                            | 480/2054 (23.4)        | 119/749 (15.9)           | <0.001         |
| Stroke or TIA                                                        | 323/2141 (15.1)        | 123/773 (15.9)           | 0.58           |
| Coronary artery disease                                              | 239/2133 (11.2)        | 73/772 (9.5)             | 0.18           |
| Peripheral artery disease                                            | 43/2122 (2.0)          | 22/770 (2.9)             | 0.18           |
| Atrial fibrillation or flutter                                       | 204/2135 (9.6)         | 15/772 (1.9)             | <0.001         |
| Congestive heart failure                                             | 47/2135 (2.2)          | 13/772 (1.7)             | 0.39           |
| Clinically significant valvular disease<br>or prosthetic heart valve | 53/2141 (2.5)          | 13/773 (1.7)             | 0.20           |
| Atherogenic dyslipidemia <sup>(1)</sup>                              | 147/1684 (8.7)         | 60/637 (9.4)             | 0.60           |
| Atherogenic dyslipidemia <sup>(2)</sup>                              | 364/1685 (21.6)        | 144/538 (22.6)           | 0.61           |
| Diabetes and Atherogenic dyslipidemia <sup>(2)</sup>                 | 97/2137 (4.5)          | 51/772 (6.6)             | 0.025          |
| Body-mass index, mean (SD)                                           | 26.5 (4.7)             | 26.3 (4.8)               | 0.36           |
| <b>Blood pressure-mm Hg</b>                                          |                        |                          |                |
| Systolic, mean (SD)                                                  | 143 (23)               | 152 (25)                 | <0.001         |
| Diastolic, mean (SD)                                                 | 81 (13)                | 84 (13)                  | <0.001         |
| Glucose-mg/dl, median (IQR)                                          | 102 (90-127)           | 105 (91-130)             | 0.096          |
| <b>Cholesterol- mg/dl</b>                                            |                        |                          |                |
| LDL, mean (SD)                                                       | 120 (39)               | 124 (41)                 | 0.022          |
| HDL, mean (SD)                                                       | 51 (16)                | 51 (16)                  | 0.87           |
| Triglyceride, median(IQR), mg/dl                                     | 120.0 (87.0-<br>167.0) | 119.0 (88.0-179.0)       | 0.19           |
| <b>Socio-economic factors - no/total no,<br/>(%)</b>                 |                        |                          |                |
| Living alone                                                         | 606/2095 (28.9)        | 271/751 (36.1)           | <0.001         |
| Living in rural area                                                 | 244/2069 (11.8)        | 102/766 (13.3)           | 0.27           |

|                              |                      |                |        |
|------------------------------|----------------------|----------------|--------|
| Unemployed                   | 119/2035 (5.9)       | 36/742 (4.9)   | 0.31   |
| Educational level            |                      |                | <0.001 |
| No education                 | 63/1965 (3.2)        | 39/699 (5.6)   |        |
| Primary education            | 530/1965 (27.0)      | 232/699 (33.2) |        |
| Secondary education          | 996/1965 (50.7)      | 333/699 (47.6) |        |
| Tertiary education           | 376/1965 (19.1)      | 95/699 (13.6)  |        |
| TOAST classification         |                      |                | <0.001 |
| Large artery atherosclerosis | 573/1931 (29.7)      | 0/762 (0.0)    |        |
| Small vessel disease         | 0/1931 (0.0)         | 762/762 (100)  |        |
| Cardioembolism               | 382/1931 (19.8)      | 0/762 (0.0)    |        |
| Other determined cause       | 156/1931 (8.1)       | 0/762 (0.0)    |        |
| Undetermined                 | 820/1931 (42.5)      | 0/762 (0.0)    |        |
| ABCD2 score                  |                      |                | <0.001 |
| 0-3                          | 722/1861 (38.8)      | 145/708 (20.5) |        |
| 4-5                          | 832/1861 (44.7)      | 358/708 (50.6) |        |
| 6-7                          | 307/1861 (16.5)      | 205/708 (28.9) |        |
| Acute infarction             |                      |                | <0.001 |
| No                           | 1244/2021 (61.6)     | 299/764 (39.1) |        |
| Single                       | 493/2021 (24.4)      | 366/764 (47.9) |        |
| Multiple                     | 284/2021 (14.0)      | 99/764 (13.0)  |        |
| PICO's score                 |                      |                | <0.001 |
| 0                            | 2141/2141<br>(100.0) | 392/773 (50.7) |        |
| 1                            | 0/2141 (0.0)         | 240/773 (31.1) |        |
| ≥2                           | 0/2141 (0.0)         | 141/773 (18.2) |        |

**eTable 5.** Multivariable Association Between Baseline Characteristics and ASCOD Grades S1-S2 vs S0

|                                 | <b>OR (95%CI)</b> | <b>P-value</b> |
|---------------------------------|-------------------|----------------|
| Acute infarction                |                   |                |
| No                              | 1.00 (reference)  | -              |
| Single                          | 2.54 (2.07-3.12)  | <0.001         |
| Multiple                        | 1.05 (0.79-1.39)  | 0.74           |
| Atrial fibrillation or flutter  | 0.16 (0.09-0.27)  | <0.001         |
| Ethnicity                       |                   |                |
| Non-Asian                       | 1.00 (ref.)       | -              |
| Asian                           | 1.84 (1.50-2.26)  | <0.001         |
| Age, per 10 years increase      | 1.22 (1.13-1.32)  | <0.001         |
| Systolic, per 24 mm Hg increase | 1.26 (1.14-1.39)  | <0.001         |
| Living alone                    | 1.59 (1.30-1.94)  | <0.001         |
| Regular physical activity       | 0.60 (0.47-0.77)  | <0.001         |
| Dyslipidemia                    | 1.44 (1.17-1.77)  | 0.001          |
| Diabetes                        | 1.41 (1.12-1.77)  | 0.003          |
| ABCD2 score                     |                   |                |
| 0-3                             | 1.00 (ref.)       | -              |
| 4-5                             | 1.38 (1.09-1.74)  | 0.008          |
| 6-7                             | 1.50 (1.12-2.00)  | 0.006          |
| LDL, per 40 mg/dL increase      | 1.13 (1.01-1.26)  | 0.029          |

**eTable 6.** Univariate Comparison Between Baseline Characteristics and ASCOD Grades S1-S2 and S3 vs S0

|                                                                      | <b>S0<br/>(n=2141)</b> | <b>S1/S2/S3<br/>(n=1685)</b> | <b>P-value</b> |
|----------------------------------------------------------------------|------------------------|------------------------------|----------------|
| Age-yr, mean (SD)                                                    | 63.2 (13.8)            | 70.6 (11.2)                  | <0.001         |
| Male sex - no/total no, (%)                                          | 1276/2137 (59.7)       | 1007/1683 (59.8)             | 0.94           |
| Ethnicity                                                            |                        |                              | <0.001         |
| Asian                                                                | 445/2141 (20.8)        | 432/1685 (25.6)              |                |
| Non-Asian                                                            | 1696/2141 (79.2)       | 1253/1685 (74.4)             |                |
| Qualifying event                                                     |                        |                              | <0.001         |
| Stroke                                                               | 741/2021 (36.7)        | 847/1673 (50.6)              |                |
| TIA                                                                  | 1280/2021 (63.3)       | 826/1673 (49.4)              |                |
| <b>Medical history - no/total no, (%)</b>                            |                        |                              |                |
| Hypertension                                                         | 1364/2132 (64.0)       | 1328/1684 (78.9)             | <0.001         |
| Diabetes                                                             | 335/2132 (15.7)        | 385/1680 (22.9)              | <0.001         |
| Dyslipidemia                                                         | 1401/2141 (65.4)       | 1290/1685 (76.6)             | <0.001         |
| Smoke - no/total no, (%)                                             |                        |                              | 0.003          |
| Never                                                                | 1107/2118 (52.3)       | 903/1662 (54.3)              |                |
| Former                                                               | 505/2118 (23.8)        | 437/1662 (26.3)              |                |
| Current                                                              | 506/2118 (23.9)        | 322/1662 (19.4)              |                |
| Regular alcohol consumption                                          | 445/2115 (21.0)        | 347/1665 (20.8)              | 0.88           |
| Regular physical activity                                            | 480/2054 (23.4)        | 313/1637 (19.1)              | 0.002          |
| Stroke or TIA                                                        | 323/2141 (15.1)        | 330/1685 (19.6)              | <0.001         |
| Coronary artery disease                                              | 239/2133 (11.2)        | 236/1679 (14.1)              | 0.008          |
| Peripheral artery disease                                            | 43/2122 (2.0)          | 70/1676 (4.2)                | <0.001         |
| Atrial fibrillation or flutter                                       | 204/2135 (9.6)         | 130/1680 (7.7)               | 0.049          |
| Congestive heart failure                                             | 47/2135 (2.2)          | 61/1680 (3.6)                | 0.008          |
| Clinically significant valvular disease<br>or prosthetic heart valve | 53/2141 (2.5)          | 52/1685 (3.1)                | 0.25           |
| Atherogenic dyslipidemia <sup>(1)</sup>                              | 147/1684 (8.7)         | 123/1398 (8.8)               | 0.95           |
| Atherogenic dyslipidemia <sup>(2)</sup>                              | 364/1685 (21.6)        | 288/1399 (20.6)              | 0.49           |
| Diabetes and Atherogenic dyslipidemia <sup>(2)</sup>                 | 97/2137 (4.5)          | 98/1682 (5.8)                | 0.073          |
| Body-mass index, mean (SD)                                           | 26.5 (4.7)             | 26.1 (4.5)                   | 0.016          |
| <b>Blood pressure-mm Hg</b>                                          |                        |                              |                |
| Systolic, mean (SD)                                                  | 143 (23)               | 149 (24)                     | <0.001         |
| Diastolic, mean (SD)                                                 | 81 (13)                | 81 (14)                      | 0.55           |
| Glucose-mg/dl, median (IQR)                                          | 102 (90-127)           | 105 (92-130)                 | 0.27           |
| <b>Cholesterol- mg/dl</b>                                            |                        |                              |                |
| LDL, mean (SD)                                                       | 120 (39)               | 119 (42)                     | 0.69           |
| HDL, mean (SD)                                                       | 51 (16)                | 51 (16)                      | 0.84           |
| Triglyceride, median(IQR), mg/dl                                     | 120.0 (87.0-<br>167.0) | 115.0 (88.0-160.0)           | 0.67           |
| <b>Socio-economic factors - no/total no,<br/>(%)</b>                 |                        |                              |                |
| Living alone                                                         | 606/2095 (28.9)        | 655/1657 (39.5)              | <0.001         |
| Living in rural area                                                 | 244/2069 (11.8)        | 207/1673 (12.4)              | 0.59           |
| Unemployed                                                           | 119/2035 (5.9)         | 75/1642 (4.6)                | 0.084          |

|                              |                      |                  |        |
|------------------------------|----------------------|------------------|--------|
| Educational level            |                      |                  | <0.001 |
| No education                 | 63/1965 (3.2)        | 96/1570 (6.1)    |        |
| Primary education            | 530/1965 (27.0)      | 547/1570 (34.8)  |        |
| Secondary education          | 996/1965 (50.7)      | 685/1570 (43.6)  |        |
| Tertiary education           | 376/1965 (19.1)      | 242/1570 (15.4)  |        |
| TOAST classification         |                      |                  | <0.001 |
| Large artery atherosclerosis | 573/1931 (29.7)      | 295/1608 (18.4)  |        |
| Small vessel disease         | 0/1931 (0.0)         | 762/1608 (47.4)  |        |
| Cardioembolism               | 382/1931 (19.8)      | 177/1608 (11.0)  |        |
| Other determined cause       | 156/1931 (8.1)       | 40/1608 (2.5)    |        |
| Undetermined                 | 820/1931 (42.5)      | 334/1608 (20.8)  |        |
| ABCD2 score                  |                      |                  | <0.001 |
| 0-3                          | 722/1861 (38.8)      | 369/1536 (24.0)  |        |
| 4-5                          | 832/1861 (44.7)      | 805/1536 (52.4)  |        |
| 6-7                          | 307/1861 (16.5)      | 362/1536 (23.6)  |        |
| Acute infarction             |                      |                  | <0.001 |
| No                           | 1244/2021 (61.6)     | 720/1673 (43.0)  |        |
| Single                       | 493/2021 (24.4)      | 632/1673 (37.8)  |        |
| Multiple                     | 284/2021 (14.0)      | 321/1673 (19.2)  |        |
| PICO's score                 |                      |                  | <0.001 |
| 0                            | 2141/2141<br>(100.0) | 392/1685 (23.2)  |        |
| 1                            | 0/2141 (0.0)         | 1061/1685 (60.0) |        |
| ≥2                           | 0/2141 (0.0)         | 232/1685 (13.8)  |        |

**eTable 7.** Multivariable Association Between Baseline Characteristics and ASCOD Grades S1-S2 and S3 vs S0

|                                 | <b>OR (95%CI)</b> | <b>P-value</b> |
|---------------------------------|-------------------|----------------|
| Age, per 10 years increase      | 1.55 (1.45-1.65)  | <0.001         |
| Living alone                    | 1.60 (0.38-1.86)  | <0.001         |
| Acute infarction                |                   |                |
| No                              | 1.00 (ref.)       | -              |
| Single                          | 3.13 (2.14-4.57)  | <0.001         |
| Multiple                        | 2.30 (1.60-3.33)  | <0.001         |
| Atrial fibrillation or flutter  | 0.55 (0.43-0.70)  | <0.001         |
| Dyslipidemia                    | 1.39 (1.19-1.64)  | <0.001         |
| Systolic, per 24 mm Hg increase | 1.14 (1.06-1.23)  | 0.001          |
| Hypertension                    | 1.33 (1.12-1.58)  | 0.001          |
| Ethnicity                       |                   |                |
| Non-Asian                       | 1.00 (ref.)       | -              |
| Asian                           | 1.32 (1.11-1.57)  | 0.001          |
| Diabetes                        | 1.25 (1.05-1.50)  | 0.012          |
| Regular physical activity       | 0.80 (0.66-0.96)  | 0.015          |
| Peripheral artery disease       | 1.67 (1.10-2.52)  | 0.015          |
| Qualifying event                |                   |                |
| TIA                             | 1.00 (ref.)       | -              |
| Stroke                          | 0.67 (0.47-0.96)  | 0.032          |

**eTable 8.** Univariate Comparison Between Baseline Characteristics and ASCOD Grades S1-S2 vs A0, S0, C0, O0, and D0

|                                                                      | <b>A0/S0/C0/OD0<br/>(n=484)</b> | <b>S1/S2<br/>(n=773)</b> | <b>P-value</b> |
|----------------------------------------------------------------------|---------------------------------|--------------------------|----------------|
| Age-yr, mean (SD)                                                    | 58.4 (14.7)                     | 67.0 (11.5)              | <0.001         |
| Male sex - no/total no, (%)                                          | 250/482 (51.9)                  | 464/772 (60.1)           | 0.004          |
| Ethnicity                                                            |                                 |                          | <0.001         |
| Asian                                                                | 80/484 (16.5)                   | 272/773 (35.2)           |                |
| Non-Asian                                                            | 404/484 (83.5)                  | 501/773 (64.8)           |                |
| Qualifying event                                                     |                                 |                          | <0.001         |
| Stroke                                                               | 106/432 (24.5)                  | 438/764 (57.3)           |                |
| TIA                                                                  | 326/432 (75.5)                  | 326/764 (42.7)           |                |
| <b>Medical history - no/total no, (%)</b>                            |                                 |                          |                |
| Hypertension                                                         | 240/481 (49.9)                  | 563/773 (72.8)           | <0.001         |
| Diabetes                                                             | 59/480 (12.3)                   | 189/771 (24.5)           | <0.001         |
| Dyslipidemia                                                         | 287/448 (59.3)                  | 590/773 (76.3)           | <0.001         |
| Smoke - no/total no, (%)                                             |                                 |                          | 0.87           |
| Never                                                                | 273/475 (57.5)                  | 425/756 (56.2)           |                |
| Former                                                               | 93/475 (19.6)                   | 148/756 (19.6)           |                |
| Current                                                              | 109/475 (22.9)                  | 183/756 (24.2)           |                |
| Regular alcohol consumption                                          | 75/477 (15.7)                   | 141/761 (18.5)           | 0.21           |
| Regular physical activity                                            | 148/467 (31.7)                  | 119/749 (15.9)           | <0.001         |
| Stroke or TIA                                                        | 46/484 (9.5)                    | 123/773 (15.9)           | 0.001          |
| Coronary artery disease                                              | 0/480 (0.0)                     | 73/772 (9.5)             | <0.001         |
| Peripheral artery disease                                            | 0/474 (0.0)                     | 22/770 (2.9)             | <0.001         |
| Atrial fibrillation or flutter                                       | 4/482 (0.8)                     | 15/772 (1.9)             | 0.12           |
| Congestive heart failure                                             | 0/482 (0.0)                     | 13/772 (1.7)             | 0.003          |
| Clinically significant valvular disease<br>or prosthetic heart valve | 3/484 (0.6)                     | 13/773 (1.7)             | 0.10           |
| Atherogenic dyslipidemia <sup>(1)</sup>                              | 28/349 (8.0)                    | 60/637 (9.4)             | 0.46           |
| Atherogenic dyslipidemia <sup>(2)</sup>                              | 67/349 (19.2)                   | 144/538 (22.6)           | 0.22           |
| Diabetes and Atherogenic dyslipidemia <sup>(2)</sup>                 | 15/482 (3.1)                    | 51/772 (6.6)             | 0.007          |
| Body-mass index, mean (SD)                                           | 26.4 (4.7)                      | 26.3 (4.8)               | 0.70           |
| <b>Blood pressure-mm Hg</b>                                          |                                 |                          |                |
| Systolic, mean (SD)                                                  | 140 (22)                        | 152 (25)                 | <0.001         |
| Diastolic, mean (SD)                                                 | 81 (12)                         | 84 (13)                  | <0.001         |
| Glucose-mg/dl, median (IQR)                                          | 99 (90-121)                     | 105 (91-130)             | 0.99           |
| <b>Cholesterol- mg/dl</b>                                            |                                 |                          |                |
| LDL, mean (SD)                                                       | 125 (42)                        | 124 (41)                 | 0.72           |
| HDL, mean (SD)                                                       | 53 (19)                         | 51 (16)                  | 0.070          |
| Triglyceride, median(IQR), mg/dl                                     | 115.0 (82.0-161.0)              | 119.0 (88.0-179.0)       | 0.038          |
| <b>Socio-economic factors - no/total no,<br/>(%)</b>                 |                                 |                          |                |
| Living alone                                                         | 145/468 (31.0)                  | 271/751 (36.1)           | 0.068          |
| Living in rural area                                                 | 51/465 (11.0)                   | 102/766 (13.3)           | 0.23           |
| Unemployed                                                           | 35/459 (7.6)                    | 36/742 (4.9)             | 0.048          |



|                              |                 |                |        |
|------------------------------|-----------------|----------------|--------|
| Educational level            |                 |                | <0.001 |
| No education                 | 14/434 (3.2)    | 39/699 (5.6)   |        |
| Primary education            | 113/434 (26.0)  | 232/699 (33.2) |        |
| Secondary education          | 206/434 (47.5)  | 333/699 (47.6) |        |
| Tertiary education           | 101/424 (23.3)  | 95/699 (13.6)  |        |
| TOAST classification         |                 |                | <0.001 |
| Large artery atherosclerosis | 54/395 (13.7)   | 0/762 (0.0)    |        |
| Small vessel disease         | 0/395 (0.0)     | 762/762 (100)  |        |
| Cardioembolism               | 0/395 (0.0)     | 0/762 (0.0)    |        |
| Other determined cause       | 0/395 (0.0)     | 0/762 (0.0)    |        |
| Undetermined                 | 341/395 (86.3)  | 0/762 (0.0)    |        |
| ABCD2 score                  |                 |                | <0.001 |
| 0-3                          | 208/418 (49.8)  | 145/708 (20.5) |        |
| 4-5                          | 164/418 (39.2)  | 358/708 (50.6) |        |
| 6-7                          | 46/418 (11.0)   | 205/708 (28.9) |        |
| Acute infarction             |                 |                | <0.001 |
| No                           | 322/432 (74.5)  | 299/764 (39.1) |        |
| Single                       | 81/432 (18.8)   | 366/764 (47.9) |        |
| Multiple                     | 29/432 (6.7)    | 99/764 (13.0)  |        |
| PICO's score                 |                 |                | <0.001 |
| 0                            | 484/484 (100.0) | 392/773 (50.7) |        |
| 1                            | 0/484 (0.0)     | 240/773 (31.1) |        |
| ≥2                           | 0/484 (0.0)     | 141/773 (18.2) |        |

---

**eTable 9.** Univariate Comparison Between Baseline Characteristics and ASCOD Grades S1-S2 and S3 vs A0, S0, C0, O0, and D0

|                                                                      | <b>A0/S0/C0/OD0<br/>(n=484)</b> | <b>S1/S2/S3<br/>(n=1685)</b> | <b>P-value</b> |
|----------------------------------------------------------------------|---------------------------------|------------------------------|----------------|
| Age-yr, mean (SD)                                                    | 58.4 (14.7)                     | 70.6 (11.2)                  | <0.001         |
| Male sex - no/total no, (%)                                          | 250/482 (51.9)                  | 1007/1683 (59.8)             | 0.002          |
| Ethnicity                                                            |                                 |                              | <0.001         |
| Asian                                                                | 80/484 (16.5)                   | 432/1685 (25.6)              |                |
| Non-Asian                                                            | 404/484 (83.5)                  | 1253/1685 (74.4)             |                |
| Qualifying event                                                     |                                 |                              | <0.001         |
| Stroke                                                               | 106/432 (24.5)                  | 847/1673 (50.6)              |                |
| TIA                                                                  | 326/432 (75.5)                  | 826/1673 (49.4)              |                |
| <b>Medical history - no/total no, (%)</b>                            |                                 |                              |                |
| Hypertension                                                         | 240/481 (49.9)                  | 1328/1684 (78.9)             | <0.001         |
| Diabetes                                                             | 59/480 (12.3)                   | 385/1680 (22.9)              | <0.001         |
| Dyslipidemia                                                         | 287/448 (59.3)                  | 1290/1685 (76.6)             | <0.001         |
| Smoke - no/total no, (%)                                             |                                 |                              | 0.008          |
| Never                                                                | 273/475 (57.5)                  | 903/1662 (54.3)              |                |
| Former                                                               | 93/475 (19.6)                   | 437/1662 (26.3)              |                |
| Current                                                              | 109/475 (22.9)                  | 322/1662 (19.4)              |                |
| Regular alcohol consumption                                          | 75/477 (15.7)                   | 347/1665 (20.8)              | 0.013          |
| Regular physical activity                                            | 148/467 (31.7)                  | 313/1637 (19.1)              | <0.001         |
| Stroke or TIA                                                        | 46/484 (9.5)                    | 330/1685 (19.6)              | <0.001         |
| Coronary artery disease                                              | 0/480 (0.0)                     | 236/1679 (14.1)              | <0.001         |
| Peripheral artery disease                                            | 0/474 (0.0)                     | 70/1676 (4.2)                | <0.001         |
| Atrial fibrillation or flutter                                       | 4/482 (0.8)                     | 130/1680 (7.7)               | <0.001         |
| Congestive heart failure                                             | 0/482 (0.0)                     | 61/1680 (3.6)                | <0.001         |
| Clinically significant valvular disease<br>or prosthetic heart valve | 3/484 (0.6)                     | 52/1685 (3.1)                | 0.002          |
| Atherogenic dyslipidemia <sup>(1)</sup>                              | 28/349 (8.0)                    | 123/1398 (8.8)               | 0.64           |
| Atherogenic dyslipidemia <sup>(2)</sup>                              | 67/349 (19.2)                   | 288/1399 (20.6)              | 0.56           |
| Diabetes and Atherogenic dyslipidemia <sup>(2)</sup>                 | 15/482 (3.1)                    | 98/1682 (5.8)                | 0.018          |
| Body-mass index, mean (SD)                                           | 26.4 (4.7)                      | 26.1 (4.5)                   | 0.23           |
| <b>Blood pressure-mm Hg</b>                                          |                                 |                              |                |
| Systolic, mean (SD)                                                  | 140 (22)                        | 149 (24)                     | <0.001         |
| Diastolic, mean (SD)                                                 | 81 (12)                         | 81 (14)                      | 0.29           |
| Glucose-mg/dl, median (IQR)                                          | 99 (90-121)                     | 105 (92-130)                 | 0.49           |
| <b>Cholesterol- mg/dl</b>                                            |                                 |                              |                |
| LDL, mean (SD)                                                       | 125 (42)                        | 119 (42)                     | 0.021          |
| HDL, mean (SD)                                                       | 53 (19)                         | 51 (16)                      | 0.029          |
| Triglyceride, median(IQR), mg/dl                                     | 115.0 (82.0-161.0)              | 115.0 (88.0-160.0)           | 0.28           |
| <b>Socio-economic factors - no/total no,<br/>(%)</b>                 |                                 |                              |                |
| Living alone                                                         | 145/468 (31.0)                  | 655/1657 (39.5)              | 0.001          |
| Living in rural area                                                 | 51/465 (11.0)                   | 207/1673 (12.4)              | 0.41           |
| Unemployed                                                           | 35/459 (7.6)                    | 75/1642 (4.6)                | 0.009          |

|                              |                 |                  |        |
|------------------------------|-----------------|------------------|--------|
| Educational level            |                 |                  | <0.001 |
| No education                 | 14/434 (3.2)    | 96/1570 (6.1)    |        |
| Primary education            | 113/434 (26.0)  | 547/1570 (34.8)  |        |
| Secondary education          | 206/434 (47.5)  | 685/1570 (43.6)  |        |
| Tertiary education           | 101/424 (23.3)  | 242/1570 (15.4)  |        |
| TOAST classification         |                 |                  | <0.001 |
| Large artery atherosclerosis | 54/395 (13.7)   | 295/1608 (18.4)  |        |
| Small vessel disease         | 0/395 (0.0)     | 762/1608 (47.4)  |        |
| Cardioembolism               | 0/395 (0.0)     | 177/1608 (11.0)  |        |
| Other determined cause       | 0/395 (0.0)     | 40/1608 (2.5)    |        |
| Undetermined                 | 341/395 (86.3)  | 334/1608 (20.8)  |        |
| ABCD2 score                  |                 |                  | <0.001 |
| 0-3                          | 208/418 (49.8)  | 369/1536 (24.0)  |        |
| 4-5                          | 164/418 (39.2)  | 805/1536 (52.4)  |        |
| 6-7                          | 46/418 (11.0)   | 362/1536 (23.6)  |        |
| Acute infarction             |                 |                  | <0.001 |
| No                           | 322/432 (74.5)  | 720/1673 (43.0)  |        |
| Single                       | 81/432 (18.8)   | 632/1673 (37.8)  |        |
| Multiple                     | 29/432 (6.7)    | 321/1673 (19.2)  |        |
| PICO's score                 |                 |                  | <0.001 |
| 0                            | 484/484 (100.0) | 392/1685 (23.2)  |        |
| 1                            | 0/484 (0.0)     | 1061/1685 (60.0) |        |
| ≥2                           | 0/484 (0.0)     | 232/1685 (13.8)  |        |

---

**eTable 10.** Baseline Characteristics According to ASCOD Grading System C (Cardiac Pathology)

|                                                                   | <b>C0<br/>(n=2733)</b> | <b>C1/C2<br/>(n=800)</b> | <b>C3<br/>(n=226)</b> | <b>C9<br/>(n=88)</b> |
|-------------------------------------------------------------------|------------------------|--------------------------|-----------------------|----------------------|
| Age-yr, mean (SD)                                                 | 65.9 (13.0)            | 70.2 (12.4)              | 61.5 (15.0)           | 63.2 (14.6)          |
| Male sex - no/total no, (%)                                       | 1627/2727 (59.7)       | 477/800 (59.6)           | 138/226 (61.1)        | 53/88 (60.2)         |
| Ethnicity                                                         |                        |                          |                       |                      |
| Asian                                                             | 685/2733 (25.1)        | 146/800 (18.3)           | 23/226 (10.2)         | 28/88 (31.8)         |
| Non-Asian                                                         | 2048/2733 (74.9)       | 654/800 (81.7)           | 203/226 (89.8)        | 60/88 (68.2)         |
| Qualifying event                                                  |                        |                          |                       |                      |
| Stroke                                                            | 1082/2602 (41.6)       | 388/787 (49.3)           | 94/225 (41.8)         | 24/80 (30.0)         |
| TIA                                                               | 1520/2602 (58.4)       | 399/787 (50.7)           | 131/225 (58.2)        | 56/80 (70.0)         |
| <b>Medical history - no/total no, (%)</b>                         |                        |                          |                       |                      |
| Hypertension                                                      | 1882/2725 (69.1)       | 638/798 (80.0)           | 127/226 (56.2)        | 60/88 (68.2)         |
| Diabetes                                                          | 544/2723 (20.0)        | 142/797 (17.8)           | 27/225 (12.0)         | 14/87 (16.1)         |
| Dyslipidemia                                                      | 1956/2733 (71.6)       | 551/800 (68.9)           | 155/226 (68.6)        | 47/88 (53.4)         |
| Smoke - no/total no, (%)                                          |                        |                          |                       |                      |
| Never                                                             | 1394/2699 (51.6)       | 459/791 (58.0)           | 118/223 (52.9)        | 53/88 (60.2)         |
| Former                                                            | 660/2699 (24.5)        | 213/791 (26.9)           | 54/223 (24.2)         | 15/88 (17.1)         |
| Current                                                           | 645/2699 (23.9)        | 119/791 (15.1)           | 51/223 (22.9)         | 20/88 (22.7)         |
| Regular alcohol consumption                                       | 569/2699 (21.1)        | 169/789 (21.4)           | 51/225 (22.7)         | 9/88 (10.2)          |
| Regular physical activity                                         | 572/2624 (21.8)        | 148/780 (19.0)           | 69/220 (31.4)         | 12/88 (13.6)         |
| Stroke or TIA                                                     | 457/2733 (16.7)        | 148/800 (18.5)           | 31/226 (13.7)         | 22/88 (25.0)         |
| Coronary artery disease                                           | 268/2724 (9.8)         | 185/796 (23.2)           | 13/225 (5.8)          | 15/88 (17.1)         |
| Peripheral artery disease                                         | 71/2713 (2.6)          | 35/795 (4.4)             | 3/223 (1.4)           | 4/88 (4.6)           |
| Atrial fibrillation or flutter                                    | 49/2728 (1.8)          | 281/794 (35.4)           | 3/226 (1.3)           | 2/88 (2.3)           |
| Congestive heart failure                                          | 39/2727 (1.4)          | 65/795 (8.2)             | 4/226 (1.8)           | 1/88 (1.1)           |
| Clinically significant valvular disease or prosthetic heart valve | 38/2733 (1.4)          | 67/800 (8.4)             | 0/226 (0.0)           | 0/88 (0.0)           |
| Atherogenic dyslipidemia <sup>(1)</sup>                           | 210/2182 (9.6)         | 42/653 (6.4)             | 12/205 (5.9)          | 8/51 (15.7)          |
| Atherogenic dyslipidemia <sup>(2)</sup>                           | 495/2184 (22.7)        | 119/653 (18.2)           | 27/205 (13.2)         | 14/51 (27.5)         |

|                                                      |                    |                    |                    |                    |
|------------------------------------------------------|--------------------|--------------------|--------------------|--------------------|
| Diabetes and Atherogenic dyslipidemia <sup>(2)</sup> | 146/2726 (5.4)     | 40/800 (5.0)       | 7/226 (3.1)        | 4/88 (4.6)         |
| Body-mass index, mean (SD)                           | 26.4 (4.6)         | 26.4 (4.6)         | 25.9 (4.0)         | 63.2 (14.6)        |
| <b>Blood pressure-mm Hg</b>                          |                    |                    |                    |                    |
| Systolic, mean (SD)                                  | 147 (23)           | 144 (25)           | 142 (22)           | 148 (22)           |
| Diastolic, mean (SD)                                 | 82 (13)            | 79 (15)            | 80 (13)            | 86 (15)            |
| Glucose-mg/dl, median (IQR)                          | 104 (91-131)       | 104 (90-126)       | 98 (89-114)        | 101 (91-124)       |
| <b>Cholesterol- mg/dl</b>                            |                    |                    |                    |                    |
| LDL, mean (SD)                                       | 121 (42)           | 112 (38)           | 119 (35)           | 117 (38)           |
| HDL, mean (SD)                                       | 51 (17)            | 50 (15)            | 54 (17)            | 45 (12)            |
| Triglyceride, median(IQR), mg/dl                     | 121.0 (89.0-169.0) | 110.0 (83.0-156.0) | 106.0 (77.0-141.0) | 133.0 (93.0-188.0) |
| <b>Socio-economic factors - no/total no, (%)</b>     |                    |                    |                    |                    |
| Living alone                                         | 927/2678 (34.6)    | 248/791 (31.4)     | 72/219 (32.9)      | 21/85 (24.7)       |
| Living in rural area                                 | 338/2662 (12.7)    | 97/792 (12.3)      | 10/222 (4.5)       | 9/87 (10.3)        |
| Unemployed                                           | 145/2616 (5.5)     | 38/777 (4.9)       | 8/219 (3.7)        | 4/86 (4.7)         |
| Educational level                                    |                    |                    |                    |                    |
| No education                                         | 108/2510 (4.3)     | 44/748 (5.9)       | 3/215 (1.4)        | 4/83 (4.8)         |
| Primary education                                    | 769/2510 (30.6)    | 245/748 (32.8)     | 47/215 (21.9)      | 19/83 (22.9)       |
| Secondary education                                  | 1203/2510 (47.9)   | 337/748 (45.0)     | 104/215 (48.4)     | 53/83 (63.9)       |
| Tertiary education                                   | 430/2510 (17.1)    | 122/748 (16.3)     | 61/215 (28.4)      | 7/83 (8.4)         |
| TOAST classification                                 |                    |                    |                    |                    |
| Large artery atherosclerosis                         | 743/2507 (29.6)    | 68/760 (8.9)       | 38/220 (17.3)      | 27/71 (38.0)       |
| Small vessel disease                                 | 665/2507 (26.5)    | 40/760 (5.3)       | 43/220 (19.5)      | 14/71 (19.7)       |
| Cardioembolism                                       | 0/2507 (0.0)       | 562/760 (73.9)     | 0/220 (0.0)        | 0/71 (0.0)         |
| Other determined cause                               | 166/2507 (6.6)     | 8/760 (1.1)        | 14/220 (6.4)       | 8/71 (11.3)        |
| Undetermined                                         | 33/2507 (37.2)     | 82/760 (10.8)      | 125/220 (56.8)     | 22/71 (31.0)       |
| ABCD2 score                                          |                    |                    |                    |                    |
| 0-3                                                  | 805/2423 (33.2)    | 183/704 (26.0)     | 92/211 (43.6)      | 23/79 (29.1)       |
| 4-5                                                  | 1131/2423 (46.7)   | 381/704 (54.1)     | 88/211 (41.7)      | 41/79 (51.9)       |
| 6-7                                                  | 487/2423 (20.1)    | 140/704 (19.9)     | 31/211 (14.7)      | 15/79 (19.0)       |

|                                           |                  |                |                |              |
|-------------------------------------------|------------------|----------------|----------------|--------------|
| Acute infarction                          |                  |                |                |              |
| No                                        | 1419/2602 (54.5) | 371/787 (47.2) | 121/225 (53.8) | 53/80 (66.3) |
| Single                                    | 784/2602 (30.1)  | 245/787 (31.1) | 78/225 (34.7)  | 18/80 (22.5) |
| Multiple                                  | 399/2602 (15.3)  | 171/787 (21.7) | 26/225 (11.5)  | 9/80 (11.2)  |
| PICO's score                              |                  |                |                |              |
| 0                                         | 1792/2733 (64.6) | 526/800 (65.8) | 159/226 (70.4) | 77/88 (87.5) |
| 1                                         | 762/2733 (27.9)  | 241/800 (30.1) | 50/226 (22.1)  | 8/88 (9.1)   |
| ≥2                                        | 179/2733 (6.5)   | 33/800 (4.1)   | 17/226 (7.5)   | 3/88 (3.4)   |
| <b>Score at discharge</b>                 |                  |                |                |              |
| NIHSS at discharge                        |                  |                |                |              |
| 0                                         | 1942/2441 (79.6) | 599/739 (81.1) | 187/219 (85.4) | 62/77 (80.5) |
| 1-4                                       | 483/2441 (19.8)  | 134/739 (18.1) | 32/219 (14.6)  | 15/77 (19.5) |
| >5                                        | 16/2441 (0.6)    | 6/739 (0.8)    | 0/219 (0.0)    | 0/77 (0.0)   |
| RANKIN at discharge >1 - no/total no, (%) | 44/2447 (1.8)    | 25/763 (3.3)   | 0/219 (0.0)    | 0/76 (0.0)   |

<sup>(1)</sup> Define as triglycerides >200 mg/dL and HDL ≤40 mg/dL for men (HDL ≤50 mg/dL for women);

<sup>(2)</sup> Define as triglycerides >150 mg/dL and HDL ≤50 mg/dL

**eTable 11.** Five-Year Event Rates According to ASCOD Classification C (Cardiac Pathology)

|                            | <b>C0</b><br><b>(n=2733)</b> | <b>C1/C2</b><br><b>(n=800)</b> | <b>C3</b><br><b>(n=226)</b> | <b>P-value<sup>(1)</sup></b> | <b>P-value<sup>(2)</sup></b> |
|----------------------------|------------------------------|--------------------------------|-----------------------------|------------------------------|------------------------------|
| Major cardiovascular event | 315 (12.3)<br>(11.0 to 13.6) | 125 (16.6)<br>(14.1 to 19.4)   | 18 (8.3)<br>(5.1 to 12.5)   | 0.001 <sup>(a)</sup>         | 0.001 <sup>(a)</sup>         |
| Recurrent stroke           | 232 (9.0)                    | 87 (11.5)                      | 18 (8.3)                    | 0.090 <sup>(a)</sup>         | 0.034 <sup>(a)</sup>         |
| Death                      | 231 (9.2)                    | 124 (17.2)                     | 7 (3.4)                     | <0.001 <sup>(b)</sup>        | <0.001 <sup>(b)</sup>        |

Values are number of events (event rate expressed as % estimated from Kaplan-Meier or Kalbfleisch and Prentice estimates for time to event outcomes).

<sup>(1)</sup> P-value for comparing the three groups; <sup>(2)</sup> P-value for comparing C0 vs. C1/C2

P-value were calculated using Gray's test <sup>(a)</sup> or log-rank test <sup>(b)</sup>

**eTable 12.** Effect Sizes Associated With ASCOD Classification C1-C2 and C3 Compared With C0

|                            | <b>C0</b>        | <b>C1/C2</b>     |        | <b>C3</b>        |       |
|----------------------------|------------------|------------------|--------|------------------|-------|
|                            |                  | HR (95% CI)      | P      | HR (95% CI)      | P     |
| Major cardiovascular event | 1.00 (reference) | 1.40 (1.14-1.72) | 0.001  | 0.68 (0.42-1.10) | 0.12  |
| Recurrent stroke           | 1.00 (reference) | 1.31 (1.02-1.67) | 0.034  | 0.94 (0.58-1.52) | 0.80  |
| Death                      | 1.00 (reference) | 1.94 (1.56-2.41) | <0.001 | 0.35 (0.17-0.75) | 0.006 |

Abbreviations: CI=confidence interval; HR=hazard ratio



**eTable 13.** Univariate Comparison Between Baseline Characteristics and ASCOD Grades C1-C2 vs C0

|                                                                      | <b>C0<br/>(n=2733)</b> | <b>C1/C2<br/>(n=800)</b> | <b>P-value</b> |
|----------------------------------------------------------------------|------------------------|--------------------------|----------------|
| Age-yr, mean (SD)                                                    | 65.9 (13.0)            | 70.2 (12.4)              | <0.001         |
| Male sex - no/total no, (%)                                          | 1627/2727 (59.7)       | 477/800 (59.6)           | 0.98           |
| Ethnicity                                                            |                        |                          | <0.001         |
| Asian                                                                | 685/2733 (25.1)        | 146/800 (18.3)           |                |
| Non-Asian                                                            | 2048/2733 (74.9)       | 654/800 (81.7)           |                |
| Qualifying event                                                     |                        |                          | <0.001         |
| Stroke                                                               | 1082/2602 (41.6)       | 388/787 (49.3)           |                |
| TIA                                                                  | 1520/2602 (58.4)       | 399/787 (50.7)           |                |
| <b>Medical history - no/total no, (%)</b>                            |                        |                          |                |
| Hypertension                                                         | 1882/2725 (69.1)       | 638/798 (80.0)           | <0.001         |
| Diabetes                                                             | 544/2723 (20.0)        | 142/797 (17.8)           | 0.18           |
| Dyslipidemia                                                         | 1956/2733 (71.6)       | 551/800 (68.9)           | 0.14           |
| Smoke - no/total no, (%)                                             |                        |                          | <0.001         |
| Never                                                                | 1394/2699 (51.6)       | 459/791 (58.0)           |                |
| Former                                                               | 660/2699 (24.5)        | 213/791 (26.9)           |                |
| Current                                                              | 645/2699 (23.9)        | 119/791 (15.1)           |                |
| Regular alcohol consumption                                          | 569/2699 (21.1)        | 169/789 (21.4)           | 0.84           |
| Regular physical activity                                            | 572/2624 (21.8)        | 148/780 (19.0)           | 0.090          |
| Stroke or TIA                                                        | 457/2733 (16.7)        | 148/800 (18.5)           | 0.24           |
| Coronary artery disease                                              | 268/2724 (9.8)         | 185/796 (23.2)           | <0.001         |
| Peripheral artery disease                                            | 71/2713 (2.6)          | 35/795 (4.4)             | 0.010          |
| Atrial fibrillation or flutter                                       | 49/2728 (1.8)          | 281/794 (35.4)           | <0.001         |
| Congestive heart failure                                             | 39/2727 (1.4)          | 65/795 (8.2)             | <0.001         |
| Clinically significant valvular disease<br>or prosthetic heart valve | 38/2733 (1.4)          | 67/800 (8.4)             | <0.001         |
| Atherogenic dyslipidemia <sup>(1)</sup>                              | 210/2182 (9.6)         | 42/653 (6.4)             | 0.012          |
| Atherogenic dyslipidemia <sup>(2)</sup>                              | 495/2184 (22.7)        | 119/653 (18.2)           | 0.016          |
| Diabetes and Atherogenic dyslipidemia <sup>(2)</sup>                 | 146/2726 (5.4)         | 40/800 (5.0)             | 0.69           |
| Body-mass index, mean (SD)                                           | 26.4 (4.6)             | 26.4 (4.6)               | 0.66           |
| <b>Blood pressure-mm Hg</b>                                          |                        |                          |                |
| Systolic, mean (SD)                                                  | 147 (23)               | 144 (25)                 | 0.001          |
| Diastolic, mean (SD)                                                 | 82 (13)                | 79 (15)                  | 0.001          |
| Glucose-mg/dl, median (IQR)                                          | 104 (91-131)           | 104 (90-126)             | 0.23           |
| <b>Cholesterol- mg/dl</b>                                            |                        |                          |                |
| LDL, mean (SD)                                                       | 121 (42)               | 112 (38)                 | <0.001         |
| HDL, mean (SD)                                                       | 51 (17)                | 50 (15)                  | 0.49           |
| Triglyceride, median(IQR), mg/dl                                     | 121.0 (89.0-169.0)     | 110.0 (83.0-156.0)       | <0.001         |
| <b>Socio-economic factors - no/total no,<br/>(%)</b>                 |                        |                          |                |
| Living alone                                                         | 927/2678 (34.6)        | 248/791 (31.4)           | 0.089          |
| Living in rural area                                                 | 338/2662 (12.7)        | 97/792 (12.3)            | 0.74           |
| Unemployed                                                           | 145/2616 (5.5)         | 38/777 (4.9)             | 0.48           |

|                              |                  |                |        |
|------------------------------|------------------|----------------|--------|
| Educational level            |                  |                | 0.16   |
| No education                 | 108/2510 (4.3)   | 44/748 (5.9)   |        |
| Primary education            | 769/2510 (30.6)  | 245/748 (32.8) |        |
| Secondary education          | 1203/2510 (47.9) | 337/748 (45.0) |        |
| Tertiary education           | 430/2510 (17.1)  | 122/748 (16.3) |        |
| TOAST classification         |                  |                | <0.001 |
| Large artery atherosclerosis | 743/2507 (29.6)  | 68/760 (8.9)   |        |
| Small vessel disease         | 665/2507 (26.5)  | 40/760 (5.3)   |        |
| Cardioembolism               | 0/2507 (0.0)     | 562/760 (73.9) |        |
| Other determined cause       | 166/2507 (6.6)   | 8/760 (1.1)    |        |
| Undetermined                 | 33/2507 (37.2)   | 82/760 (10.8)  |        |
| ABCD2 score                  |                  |                | 0.001  |
| 0-3                          | 805/2423 (33.2)  | 183/704 (26.0) |        |
| 4-5                          | 1131/2423 (46.7) | 381/704 (54.1) |        |
| 6-7                          | 487/2423 (20.1)  | 140/704 (19.9) |        |
| Acute infarction             |                  |                | <0.001 |
| No                           | 1419/2602 (54.5) | 371/787 (47.2) |        |
| Single                       | 784/2602 (30.1)  | 245/787 (31.1) |        |
| Multiple                     | 399/2602 (15.3)  | 171/787 (21.7) |        |
| PICO's score                 |                  |                | 0.028  |
| 0                            | 1792/2733 (64.6) | 526/800 (65.8) |        |
| 1                            | 762/2733 (27.9)  | 241/800 (30.1) |        |
| ≥2                           | 179/2733 (6.5)   | 33/800 (4.1)   |        |

**eTable 14.** Multivariable Association Between Baseline Characteristics and ASCOD Grades C1-C2 vs C0

|                                                                      | <b>OR (95%CI)</b> | <b>P-value</b> |
|----------------------------------------------------------------------|-------------------|----------------|
| Atrial fibrillation or flutter                                       | 23.1 (16.6-32.0)  | <0.001         |
| Qualifying event                                                     |                   |                |
| TIA                                                                  | 1.00 (ref.)       | -              |
| Stroke                                                               | 1.75 (1.44-2.14)  | <0.001         |
| Coronary artery disease                                              | 1.91 (1.48-2.46)  | <0.001         |
| Clinically significant valvular disease or<br>prosthetic heart valve | 3.45 (2.09-5.71)  | <0.001         |
| Ethnicity                                                            |                   |                |
| Non-Asian                                                            | 1.00 (ref.)       | -              |
| Asian                                                                | 0.60 (0.47-0.77)  | <0.001         |
| Congestive heart failure                                             | 2.51 (1.51-4.17)  | <0.001         |
| Age, per 10 years increase                                           | 1.15 (1.06-1.25)  | 0.001          |
| Systolic, per 24 mm Hg increase                                      | 0.85 (0.76-0.95)  | 0.004          |
| Triglycerides, per 86 mg/dL increase                                 | 0.84 (0.74-0.95)  | 0.005          |
| PICO's score                                                         |                   |                |
| 0                                                                    | 1.00 (ref.)       | -              |
| 1                                                                    | 0.79 (0.64-0.99)  | 0.040          |
| ≥2                                                                   | 0.52 (0.33-0.82)  | 0.005          |
| Living alone                                                         | 0.79 (0.64-0.97)  | 0.021          |

**eTable 15.** Univariate Comparison Between Baseline Characteristics and ASCOD Grades C1-C2 and C3 vs C0

|                                                                   | <b>C0<br/>(n=2733)</b> | <b>C1/C2/C3<br/>(n=1026)</b> | <b>P-value</b> |
|-------------------------------------------------------------------|------------------------|------------------------------|----------------|
| Age-yr, mean (SD)                                                 | 65.9 (13.0)            | 68.3 (13.5)                  | <0.001         |
| Male sex - no/total no, (%)                                       | 1627/2727 (59.7)       | 615/1026 (59.9)              | 0.88           |
| Ethnicity                                                         |                        |                              | <0.001         |
| Asian                                                             | 685/2733 (25.1)        | 169/1026 (16.5)              |                |
| Non-Asian                                                         | 2048/2733 (74.9)       | 857/1026 (83.5)              |                |
| Qualifying event                                                  |                        |                              | 0.001          |
| Stroke                                                            | 1082/2602 (41.6)       | 582/1012 (47.6)              |                |
| TIA                                                               | 1520/2602 (58.4)       | 530/1012 (52.4)              |                |
| <b>Medical history - no/total no, (%)</b>                         |                        |                              |                |
| Hypertension                                                      | 1882/2725 (69.1)       | 765/1024 (74.7)              | 0.001          |
| Diabetes                                                          | 544/2723 (20.0)        | 169/1022 (16.5)              | 0.017          |
| Dyslipidemia                                                      | 1956/2733 (71.6)       | 706/1026 (68.8)              | 0.097          |
| Smoke - no/total no, (%)                                          |                        |                              | <0.001         |
| Never                                                             | 1394/2699 (51.6)       | 577/1014 (56.9)              |                |
| Former                                                            | 660/2699 (24.5)        | 267/1014 (26.3)              |                |
| Current                                                           | 645/2699 (23.9)        | 170/1014 (16.8)              |                |
| Regular alcohol consumption                                       | 569/2699 (21.1)        | 220/1014 (21.7)              | 0.68           |
| Regular physical activity                                         | 572/2624 (21.8)        | 217/1000 (21.7)              | 0.95           |
| Stroke or TIA                                                     | 457/2733 (16.7)        | 179/1026 (17.5)              | 0.60           |
| Coronary artery disease                                           | 268/2724 (9.8)         | 198/1021 (19.4)              | <0.001         |
| Peripheral artery disease                                         | 71/2713 (2.6)          | 38/1018 (3.7)                | 0.071          |
| Atrial fibrillation or flutter                                    | 49/2728 (1.8)          | 284/1020 (27.8)              | <0.001         |
| Congestive heart failure                                          | 39/2727 (1.4)          | 69/1021 (6.8)                | <0.001         |
| Clinically significant valvular disease or prosthetic heart valve | 38/2733 (1.4)          | 67/1026 (6.5)                | <0.001         |
| Atherogenic dyslipidemia <sup>(1)</sup>                           | 210/2182 (9.6)         | 54/858 (6.3)                 | 0.003          |
| Atherogenic dyslipidemia <sup>(2)</sup>                           | 495/2184 (22.7)        | 146/858                      | 0.001          |
| Diabetes and Atherogenic dyslipidemia <sup>(2)</sup>              | 146/2726 (5.4)         | 47/1026 (4.6)                | 0.34           |
| Body-mass index, mean (SD)                                        | 26.4 (4.6)             | 26.3 (4.5)                   | 0.83           |
| <b>Blood pressure-mm Hg</b>                                       |                        |                              |                |
| Systolic, mean (SD)                                               | 147 (23)               | 143 (24)                     | <0.001         |
| Diastolic, mean (SD)                                              | 82 (13)                | 80 (15)                      | 0.001          |
| Glucose-mg/dl, median (IQR)                                       | 104 (91-131)           | 103 (90-124)                 | 0.064          |
| <b>Cholesterol- mg/dl</b>                                         |                        |                              |                |
| LDL, mean (SD)                                                    | 121 (42)               | 114 (38)                     | <0.001         |
| HDL, mean (SD)                                                    | 51 (17)                | 51 (16)                      | 0.49           |
| Triglyceride, median(IQR), mg/dl                                  | 121.0 (89.0-169.0)     | 109.0 (82.0-151.0)           | <0.001         |
| <b>Socio-economic factors - no/total no, (%)</b>                  |                        |                              |                |
| Living alone                                                      | 927/2678 (34.6)        | 320/1010 (31.7)              | 0.093          |
| Living in rural area                                              | 338/2662 (12.7)        | 107/1014 (10.6)              | 0.075          |
| Unemployed                                                        | 145/2616 (5.5)         | 46/996 (4.6)                 | 0.27           |

|                              |                  |                 |        |
|------------------------------|------------------|-----------------|--------|
| Educational level            |                  |                 | 0.46   |
| No education                 | 108/2510 (4.3)   | 47/963 (4.9)    |        |
| Primary education            | 769/2510 (30.6)  | 292/963 (30.3)  |        |
| Secondary education          | 1203/2510 (47.9) | 441/963 (45.8)  |        |
| Tertiary education           | 430/2510 (17.1)  | 183/963 (19.0)  |        |
| TOAST classification         |                  |                 | <0.001 |
| Large artery atherosclerosis | 743/2507 (29.6)  | 106/980 (10.8)  |        |
| Small vessel disease         | 665/2507 (26.5)  | 83/980 (8.5)    |        |
| Cardioembolism               | 0/2507 (0.0)     | 562/980 (57.4)  |        |
| Other determined cause       | 166/2507 (6.6)   | 22/980 (2.2)    |        |
| Undetermined                 | 33/2507 (37.2)   | 207/980 (21.1)  |        |
| ABCD2 score                  |                  |                 | 0.060  |
| 0-3                          | 805/2423 (33.2)  | 275/915 (30.0)  |        |
| 4-5                          | 1131/2423 (46.7) | 469/915 (51.3)  |        |
| 6-7                          | 487/2423 (20.1)  | 171/915 (18.7)  |        |
| Acute infarction             |                  |                 | 0.001  |
| No                           | 1419/2602 (54.5) | 492/1012 (48.6) |        |
| Single                       | 784/2602 (30.1)  | 323/1012 (31.9) |        |
| Multiple                     | 399/2602 (15.3)  | 197/1012 (19.5) |        |
| PICO's score                 |                  |                 | 0.16   |
| 0                            | 1792/2733 (64.6) | 685/1026 (66.8) |        |
| 1                            | 762/2733 (27.9)  | 291/1026 (28.4) |        |
| ≥2                           | 179/2733 (6.5)   | 50/1026 (4.9)   |        |

---

**eTable 16.** Multivariable Association Between Baseline Characteristics and ASCOD Grades C1-C2 and C3 vs C0

|                                                                      | <b>OR (95%CI)</b> | <b>P-value</b> |
|----------------------------------------------------------------------|-------------------|----------------|
| Atrial fibrillation or flutter                                       | 18.1 (13.1-25.0)  | <0.001         |
| Ethnicity                                                            |                   |                |
| Non-Asian                                                            | 1.00 (ref.)       | -              |
| Asian                                                                | 0.49 (0.40-0.61)  | <0.001         |
| Qualifying event                                                     |                   |                |
| TIA                                                                  | 1.00 (ref.)       | -              |
| Stroke                                                               | 1.53 (1.30-1.81)  | <0.001         |
| Clinically significant valvular disease or<br>prosthetic heart valve | 2.56 (1.57-4.18)  | <0.001         |
| Congestive heart failure                                             | 2.40 (1.48-3.89)  | <0.001         |
| Coronary artery disease                                              | 1.52 (1.19-1.94)  | 0.001          |
| Systolic, per 24 mm Hg increase                                      | 0.86 (0.79-0.94)  | 0.001          |
| Triglycerides, per 86 mg/dL increase                                 | 0.83 (0.74-0.93)  | 0.002          |
| Living alone                                                         | 0.81 (0.68-0.96)  | 0.017          |
| Diabetes                                                             | 0.77 (0.61-0.96)  | 0.021          |
| Living in rural area                                                 | 0.74 (0.57-0.97)  | 0.027          |
| LDL, per 40 mg/dL increase                                           | 0.91 (0.83-0.99)  | 0.043          |

**eTable 17.** Univariate Comparison Between Baseline Characteristics and ASCOD Grades C1-C2 vs A0, S0, C0, O0, and D0

|                                                                      | <b>A0/S0/C0/OD0<br/>(n=484)</b> | <b>C1/C2<br/>(n=800)</b> | <b>P-value</b> |
|----------------------------------------------------------------------|---------------------------------|--------------------------|----------------|
| Age-yr, mean (SD)                                                    | 58.4 (14.7)                     | 70.2 (12.4)              | <0.001         |
| Male sex - no/total no, (%)                                          | 250/482 (51.9)                  | 477/800 (59.6)           | 0.007          |
| Ethnicity                                                            |                                 |                          | 0.43           |
| Asian                                                                | 80/484 (16.5)                   | 146/800 (18.3)           |                |
| Non-Asian                                                            | 404/484 (83.5)                  | 654/800 (81.7)           |                |
| Qualifying event                                                     |                                 |                          | <0.001         |
| Stroke                                                               | 106/432 (24.5)                  | 388/787 (49.3)           |                |
| TIA                                                                  | 326/432 (75.5)                  | 399/787 (50.7)           |                |
| <b>Medical history - no/total no, (%)</b>                            |                                 |                          |                |
| Hypertension                                                         | 240/481 (49.9)                  | 638/798 (80.0)           | <0.001         |
| Diabetes                                                             | 59/480 (12.3)                   | 142/797 (17.8)           | 0.009          |
| Dyslipidemia                                                         | 287/448 (59.3)                  | 551/800 (68.9)           | 0.001          |
| Smoke - no/total no, (%)                                             |                                 |                          | <0.001         |
| Never                                                                | 273/475 (57.5)                  | 459/791 (58.0)           |                |
| Former                                                               | 93/475 (19.6)                   | 213/791 (26.9)           |                |
| Current                                                              | 109/475 (22.9)                  | 119/791 (15.1)           |                |
| Regular alcohol consumption                                          | 75/477 (15.7)                   | 169/789 (21.4)           | 0.013          |
| Regular physical activity                                            | 148/467 (31.7)                  | 148/780 (19.0)           | <0.001         |
| Stroke or TIA                                                        | 46/484 (9.5)                    | 148/800 (18.5)           | <0.001         |
| Coronary artery disease                                              | 0/480 (0.0)                     | 185/796 (23.2)           | <0.001         |
| Peripheral artery disease                                            | 0/474 (0.0)                     | 35/795 (4.4)             | <0.001         |
| Atrial fibrillation or flutter                                       | 4/482 (0.8)                     | 281/794 (35.4)           | <0.001         |
| Congestive heart failure                                             | 0/482 (0.0)                     | 65/795 (8.2)             | <0.001         |
| Clinically significant valvular disease<br>or prosthetic heart valve | 3/484 (0.6)                     | 67/800 (8.4)             | <0.001         |
| Atherogenic dyslipidemia <sup>(1)</sup>                              | 28/349 (8.0)                    | 42/653 (6.4)             | 0.35           |
| Atherogenic dyslipidemia <sup>(2)</sup>                              | 67/349 (19.2)                   | 119/653 (18.2)           | 0.71           |
| Diabetes and Atherogenic dyslipidemia <sup>(2)</sup>                 | 15/482 (3.1)                    | 40/800 (5.0)             | 0.11           |
| Body-mass index, mean (SD)                                           | 26.4 (4.7)                      | 26.4 (4.6)               | 0.93           |
| <b>Blood pressure-mm Hg</b>                                          |                                 |                          |                |
| Systolic, mean (SD)                                                  | 140 (22)                        | 144 (25)                 | 0.005          |
| Diastolic, mean (SD)                                                 | 81 (12)                         | 79 (15)                  | 0.18           |
| Glucose-mg/dl, median (IQR)                                          | 99 (90-121)                     | 104 (90-126)             | 0.58           |
| <b>Cholesterol- mg/dl</b>                                            |                                 |                          |                |
| LDL, mean (SD)                                                       | 125 (42)                        | 112 (38)                 | <0.001         |
| HDL, mean (SD)                                                       | 53 (19)                         | 50 (15)                  | 0.015          |
| Triglyceride, median(IQR), mg/dl                                     | 115.0 (82.0-161.0)              | 110.0 (83.0-156.0)       | 0.27           |
| <b>Socio-economic factors - no/total no,<br/>(%)</b>                 |                                 |                          |                |
| Living alone                                                         | 145/468 (31.0)                  | 248/791 (31.4)           | 0.89           |
| Living in rural area                                                 | 51/465 (11.0)                   | 97/792 (12.3)            | 0.50           |
| Unemployed                                                           | 35/459 (7.6)                    | 38/777 (4.9)             | 0.049          |

|                              |                 |                |        |
|------------------------------|-----------------|----------------|--------|
| Educational level            |                 |                | 0.002  |
| No education                 | 14/434 (3.2)    | 44/748 (5.9)   |        |
| Primary education            | 113/434 (26.0)  | 245/748 (32.8) |        |
| Secondary education          | 206/434 (47.5)  | 337/748 (45.0) |        |
| Tertiary education           | 101/424 (23.3)  | 122/748 (16.3) |        |
| TOAST classification         |                 |                | <0.001 |
| Large artery atherosclerosis | 54/395 (13.7)   | 68/760 (8.9)   |        |
| Small vessel disease         | 0/395 (0.0)     | 40/760 (5.3)   |        |
| Cardioembolism               | 0/395 (0.0)     | 562/760 (73.9) |        |
| Other determined cause       | 0/395 (0.0)     | 8/760 (1.1)    |        |
| Undetermined                 | 341/395 (86.3)  | 82/760 (10.8)  |        |
| ABCD2 score                  |                 |                | <0.001 |
| 0-3                          | 208/418 (49.8)  | 183/704 (26.0) |        |
| 4-5                          | 164/418 (39.2)  | 381/704 (54.1) |        |
| 6-7                          | 46/418 (11.0)   | 140/704 (19.9) |        |
| Acute infarction             |                 |                | <0.001 |
| No                           | 322/432 (74.5)  | 371/787 (47.2) |        |
| Single                       | 81/432 (18.8)   | 245/787 (31.1) |        |
| Multiple                     | 29/432 (6.7)    | 171/787 (21.7) |        |
| PICO's score                 |                 |                | <0.001 |
| 0                            | 484/484 (100.0) | 526/800 (65.8) |        |
| 1                            | 0/484 (0.0)     | 241/800 (30.1) |        |
| ≥2                           | 0/484 (0.0)     | 33/800 (4.1)   |        |

---



**eTable 18.** Univariate Comparison Between Baseline Characteristics and ASCOD Grades C1-C2 and C3 vs A0, S0, C0, O0, and D0

|                                                                      | <b>A0/S0/C0/OD0<br/>(n=484)</b> | <b>C1/C2/C3<br/>(n=1026)</b> | <b>P-value</b> |
|----------------------------------------------------------------------|---------------------------------|------------------------------|----------------|
| Age-yr, mean (SD)                                                    | 58.4 (14.7)                     | 68.3 (13.5)                  | <0.001         |
| Male sex - no/total no, (%)                                          | 250/482 (51.9)                  | 615/1026 (59.9)              | 0.003          |
| Ethnicity                                                            |                                 |                              | 0.98           |
| Asian                                                                | 80/484 (16.5)                   | 169/1026 (16.5)              |                |
| Non-Asian                                                            | 404/484 (83.5)                  | 857/1026 (83.5)              |                |
| Qualifying event                                                     |                                 |                              | <0.001         |
| Stroke                                                               | 106/432 (24.5)                  | 582/1012 (47.6)              |                |
| TIA                                                                  | 326/432 (75.5)                  | 530/1012 (52.4)              |                |
| <b>Medical history - no/total no, (%)</b>                            |                                 |                              |                |
| Hypertension                                                         | 240/481 (49.9)                  | 765/1024 (74.7)              | <0.001         |
| Diabetes                                                             | 59/480 (12.3)                   | 169/1022 (16.5)              | 0.033          |
| Dyslipidemia                                                         | 287/448 (59.3)                  | 706/1026 (68.8)              | <0.001         |
| Smoke - no/total no, (%)                                             |                                 |                              | 0.002          |
| Never                                                                | 273/475 (57.5)                  | 577/1014 (56.9)              |                |
| Former                                                               | 93/475 (19.6)                   | 267/1014 (26.3)              |                |
| Current                                                              | 109/475 (22.9)                  | 170/1014 (16.8)              |                |
| Regular alcohol consumption                                          | 75/477 (15.7)                   | 220/1014 (21.7)              | 0.007          |
| Regular physical activity                                            | 148/467 (31.7)                  | 217/1000 (21.7)              | <0.001         |
| Stroke or TIA                                                        | 46/484 (9.5)                    | 179/1026 (17.5)              | <0.001         |
| Coronary artery disease                                              | 0/480 (0.0)                     | 198/1021 (19.4)              | <0.001         |
| Peripheral artery disease                                            | 0/474 (0.0)                     | 38/1018 (3.7)                | <0.001         |
| Atrial fibrillation or flutter                                       | 4/482 (0.8)                     | 284/1020 (27.8)              | <0.001         |
| Congestive heart failure                                             | 0/482 (0.0)                     | 69/1021 (6.8)                | <0.001         |
| Clinically significant valvular disease<br>or prosthetic heart valve | 3/484 (0.6)                     | 67/1026 (6.5)                | <0.001         |
| Atherogenic dyslipidemia <sup>(1)</sup>                              | 28/349 (8.0)                    | 54/858 (6.3)                 | 0.28           |
| Atherogenic dyslipidemia <sup>(2)</sup>                              | 67/349 (19.2)                   | 146/858                      | 0.37           |
| Diabetes and Atherogenic dyslipidemia <sup>(2)</sup>                 | 15/482 (3.1)                    | 47/1026 (4.6)                | 0.18           |
| Body-mass index, mean (SD)                                           | 26.4 (4.7)                      | 26.3 (4.5)                   | 0.71           |
| <b>Blood pressure-mm Hg</b>                                          |                                 |                              |                |
| Systolic, mean (SD)                                                  | 140 (22)                        | 143 (24)                     | 0.006          |
| Diastolic, mean (SD)                                                 | 81 (12)                         | 80 (15)                      | 0.20           |
| Glucose-mg/dl, median (IQR)                                          | 99 (90-121)                     | 103 (90-124)                 | 0.81           |
| <b>Cholesterol- mg/dl</b>                                            |                                 |                              |                |
| LDL, mean (SD)                                                       | 125 (42)                        | 114 (38)                     | <0.001         |
| HDL, mean (SD)                                                       | 53 (19)                         | 51 (16)                      | 0.087          |
| Triglyceride, median(IQR), mg/dl                                     | 115.0 (82.0-161.0)              | 109.0 (82.0-151.0)           | 0.14           |
| <b>Socio-economic factors - no/total no,<br/>(%)</b>                 |                                 |                              |                |
| Living alone                                                         | 145/468 (31.0)                  | 320/1010 (31.7)              | 0.79           |
| Living in rural area                                                 | 51/465 (11.0)                   | 107/1014 (10.6)              | 0.81           |
| Unemployed                                                           | 35/459 (7.6)                    | 46/996 (4.6)                 | 0.020          |

|                              |                 |                 |        |
|------------------------------|-----------------|-----------------|--------|
| Educational level            |                 |                 | 0.085  |
| No education                 | 14/434 (3.2)    | 47/963 (4.9)    |        |
| Primary education            | 113/434 (26.0)  | 292/963 (30.3)  |        |
| Secondary education          | 206/434 (47.5)  | 441/963 (45.8)  |        |
| Tertiary education           | 101/424 (23.3)  | 183/963 (19.0)  |        |
| TOAST classification         |                 |                 | <0.001 |
| Large artery atherosclerosis | 54/395 (13.7)   | 106/980 (10.8)  |        |
| Small vessel disease         | 0/395 (0.0)     | 83/980 (8.5)    |        |
| Cardioembolism               | 0/395 (0.0)     | 562/980 (57.4)  |        |
| Other determined cause       | 0/395 (0.0)     | 22/980 (2.2)    |        |
| Undetermined                 | 341/395 (86.3)  | 207/980 (21.1)  |        |
| ABCD2 score                  |                 |                 | <0.001 |
| 0-3                          | 208/418 (49.8)  | 275/915 (30.0)  |        |
| 4-5                          | 164/418 (39.2)  | 469/915 (51.3)  |        |
| 6-7                          | 46/418 (11.0)   | 171/915 (18.7)  |        |
| Acute infarction             |                 |                 | <0.001 |
| No                           | 322/432 (74.5)  | 492/1012 (48.6) |        |
| Single                       | 81/432 (18.8)   | 323/1012 (31.9) |        |
| Multiple                     | 29/432 (6.7)    | 197/1012 (19.5) |        |
| PICO's score                 |                 |                 | <0.001 |
| 0                            | 484/484 (100.0) | 685/1026 (66.7) |        |
| 1                            | 0/484 (0.0)     | 291/1026 (28.4) |        |
| ≥2                           | 0/484 (0.0)     | 50/1026 (4.9)   |        |

---

**eTable 19.** Baseline Characteristics According to ASCOD Grading System OD (Other Cause and Dissection)

|                                                                   | <b>O0/D0<br/>(n=3392)</b> | <b>O1/D1 or O2/D2<br/>(n=206)</b> | <b>O3/D3<br/>(n=249)</b> |
|-------------------------------------------------------------------|---------------------------|-----------------------------------|--------------------------|
| Age-yr, mean (SD)                                                 | 67.1 (13.1)               | 61.5 (14.1)                       | 61.4 (12.4)              |
| Male sex - no/total no, (%)                                       | 1403/3388 (41.4)          | 95/206 (46.1)                     | 48/247 (19.4)            |
| Ethnicity                                                         |                           |                                   |                          |
| Asian                                                             | 757/3392 (22.3)           | 36/206 (17.5)                     | 89/249 (35.7)            |
| Non-Asian                                                         | 2635/3392 (77.7)          | 170/206 (82.5)                    | 160/249 (64.3)           |
| Qualifying event                                                  |                           |                                   |                          |
| Stroke                                                            | 1419/3287 (43.2)          | 63/202 (31.2)                     | 106/205 (51.7)           |
| TIA                                                               | 1868/3287 (56.8)          | 139/202 (68.8)                    | 99/205 (48.3)            |
| <b>Medical history - no/total no, (%)</b>                         |                           |                                   |                          |
| Hypertension                                                      | 2415/3385 (71.3)          | 125/206 (60.7)                    | 167/246 (67.9)           |
| Diabetes                                                          | 661/3378 (19.6)           | 26/206 (12.6)                     | 40/248 (16.1)            |
| Dyslipidemia                                                      | 2434/3392 (71.8)          | 115/206 (55.8)                    | 160/249 (64.3)           |
| Smoke - no/total no, (%)                                          |                           |                                   |                          |
| Never                                                             | 1812/3349 (54.1)          | 105/205 (51.2)                    | 107/247 (43.3)           |
| Former                                                            | 825/3349 (24.6)           | 58/205 (28.3)                     | 59/247 (23.9)            |
| Current                                                           | 712/3349 (21.3)           | 42/205 (20.5)                     | 81/247 (32.8)            |
| Regular alcohol consumption                                       | 684/3350 (20.4)           | 48/205 (23.4)                     | 66/246 (26.8)            |
| Regular physical activity                                         | 706/3301 (21.4)           | 61/203 (30.1)                     | 34/208 (16.4)            |
| Stroke or TIA                                                     | 587/3392 (17.3)           | 32/206 (15.5)                     | 39/249 (15.7)            |
| Coronary artery disease                                           | 438/3380 (13.0)           | 17/204 (8.3)                      | 26/249 (10.4)            |
| Peripheral artery disease                                         | 103/3369 (3.1)            | 7/203 (3.5)                       | 3/247 (1.2)              |
| Atrial fibrillation or flutter                                    | 304/3382 (9.0)            | 10/205 (4.9)                      | 21/249 (8.4)             |
| Congestive heart failure                                          | 99/3382 (2.9)             | 4/205 (2.0)                       | 6/249 (2.4)              |
| Clinically significant valvular disease or prosthetic heart valve | 96/3392 (2.8)             | 4/206 (1.9)                       | 5/249 (2.0)              |
| Atherogenic dyslipidemia <sup>(1)</sup>                           | 238/2725 (8.7)            | 19/191 (10.0)                     | 15/175 (8.6)             |

|                                                      |                    |                    |                     |
|------------------------------------------------------|--------------------|--------------------|---------------------|
| Atherogenic dyslipidemia <sup>(2)</sup>              | 561/2726 (20.6)    | 48/191 (25.1)      | 46/176 (26.1)       |
| Diabetes and Atherogenic dyslipidemia <sup>(2)</sup> | 176/3386 (5.2)     | 8/206 (3.9)        | 13/248 (5.2)        |
| Body-mass index, mean (SD)                           | 26.3 (4.5)         | 26.6 (5.1)         | 27.2 (5.1)          |
| <b>Blood pressure-mm Hg</b>                          |                    |                    |                     |
| Systolic, mean (SD)                                  | 146 (24)           | 138 (51)           | 150 (24)            |
| Diastolic, mean (SD)                                 | 81 (13)            | 80 (13)            | 86 (15)             |
| Glucose-mg/dl, median (IQR)                          | 103 (90-128)       | 108 (92-167)       | 103 (90-126)        |
| <b>Cholesterol- mg/dl</b>                            |                    |                    |                     |
| LDL, mean (SD)                                       | 118 (41)           | 122 (38)           | 129 (42)            |
| HDL, mean (SD)                                       | 51 (16)            | 52 (16)            | 46 (12)             |
| Triglyceride, median(IQR), mg/dl                     | 115.0 (87.0-162.0) | 133.0 (91.0-188.0) | 135.0 (106.0-171.0) |
| <b>Socio-economic factors - no/total no, (%)</b>     |                    |                    |                     |
| Living alone                                         | 1141/3334 (34.2)   | 61/206 (29.6)      | 66/233 (28.3)       |
| Living in rural area                                 | 356/3347 (10.6)    | 65/206 (31.6)      | 33/210 (15.7)       |
| Unemployed                                           | 165/3286 (5.0)     | 13/206 (6.3)       | 17/206 (8.3)        |
| Educational level                                    |                    |                    |                     |
| No education                                         | 147/3159 (4.6)     | 3/199 (1.5)        | 9/198 (4.5)         |
| Primary education                                    | 988/3159 (31.3)    | 42/199 (21.1)      | 50/198 (25.3)       |
| Secondary education                                  | 1482/3159 (46.9)   | 114/199 (57.3)     | 101/198 (51.0)      |
| Tertiary education                                   | 542/3159 (17.2)    | 40/199 (20.1)      | 38/198 (19.2)       |
| TOAST classification                                 |                    |                    |                     |
| Large artery atherosclerosis                         | 807/3151 (25.6)    | 1/203 (0.5)        | 68/204 (33.3)       |
| Small vessel disease                                 | 718/3151 (22.8)    | 4/203 (2.0)        | 40/204 (19.6)       |
| Cardioembolism                                       | 525/3151 (16.7)    | 0/203 (0.0)        | 37/204 (18.1)       |
| Other determined cause                               | 0/3151 (0.0)       | 196/206 (96.5)     | 0/204 (0.0)         |
| Undetermined                                         | 1101/3151 (34.9)   | 2/203 (1.0)        | 59/204 (28.9)       |
| ABCD2 score                                          |                    |                    |                     |
| 0-3                                                  | 935/3033 (30.8)    | 104/192 (54.2)     | 64/192 (33.3)       |

|                                           |                  |                |                |
|-------------------------------------------|------------------|----------------|----------------|
| 4-5                                       | 1476/3033 (48.7) | 67/192 (34.9)  | 98/192 (51.1)  |
| 6-7                                       | 622/3033 (20.5)  | 21/192 (10.9)  | 30/192 (15.6)  |
| Acute infarction                          |                  |                |                |
| No                                        | 1735/3287 (52.8) | 132/202 (65.3) | 97/205 (47.3)  |
| Single                                    | 1011/3287 (30.8) | 46/202 (22.8)  | 68/205 (33.2)  |
| Multiple                                  | 541/3287 (16.4)  | 24/202 (11.9)  | 40/205 (19.5)  |
| PICO's score                              |                  |                |                |
| 0                                         | 2189/3392 (64.5) | 161/206 (78.2) | 204/249 (81.9) |
| 1                                         | 987/3392 (29.1)  | 35/260 (17.0)  | 39/249 (15.7)  |
| ≥2                                        | 216/3392 (6.4)   | 10/206 (4.8)   | 6/249 (2.4)    |
| <b>Score at discharge</b>                 |                  |                |                |
| NIHSS at discharge                        |                  |                |                |
| 0                                         | 2476/3091 (80.1) | 167/191 (87.4) | 147/194 (75.8) |
| 1-4                                       | 598/3091 (19.4)  | 22/191 (11.5)  | 44/194 (22.7)  |
| >5                                        | 17/3091 (0.5)    | 2/191 (1.1)    | 3/194 (1.6)    |
| RANKIN at discharge >1 - no/total no, (%) | 60/3123 (1.9)    | 2/187 (1.1)    | 7/195 (3.6)    |

<sup>(1)</sup> Define as triglycerides >200 mg/dL and HDL ≤40 mg/dL for men (HDL ≤50 mg/dL for women);

<sup>(2)</sup> Define as triglycerides >150 mg/dL and HDL ≤50 mg/dL

**eTable 20.** Five-Year Event Rates According to ASCOD Grades (Other Causes and Dissection)

|                            | <b>O0/D0</b><br><b>(n=3392)</b> | <b>O1/D1 or O2/D2</b><br><b>(n=206)</b> | <b>O3/D3</b><br><b>(n=249)</b> | <b>P-value<sup>(1)</sup></b> | <b>P-value<sup>(2)</sup></b> |
|----------------------------|---------------------------------|-----------------------------------------|--------------------------------|------------------------------|------------------------------|
| Major cardiovascular event | 411 (12.9)                      | 26 (13.6)                               | 32 (13.4)                      | 0.92 <sup>(a)</sup>          | 0.75 <sup>(a)</sup>          |
| Recurrent stroke           | 300 (9.3)                       | 22 (11.5)                               | 23 (9.6)                       | 0.63 <sup>(a)</sup>          | 0.34 <sup>(a)</sup>          |
| Death                      | 343 (11.1)                      | 10 (5.4)                                | 20 (8.5)                       | 0.038 <sup>(b)</sup>         | 0.020 <sup>(b)</sup>         |

Values are number of events (event rate expressed as % estimated from Kaplan-Meier or Kalbfleisch and Prentice estimates for time to event outcomes).

<sup>(1)</sup> P-value for comparing the three groups; <sup>(2)</sup> P-value for comparing O0/D0 vs. O1/D1

P-value were calculated using Gray's test <sup>(a)</sup> or log-rank test <sup>(b)</sup>

**eTable 21.** Effect Sizes Associated With ASCOD Grades O1-D1 or O2-D2 and O3-O3 Compared With O0-D0

|                            | <b>O0/D0</b>     | <b>O1/D1 or O2/D2</b> |       | <b>O3/D3</b>     |      |
|----------------------------|------------------|-----------------------|-------|------------------|------|
|                            |                  | HR (95% CI)           | P     | HR (95% CI)      | P    |
| Major cardiovascular event | 1.00 (reference) | 1.07 (0.72-1.58)      | 0.75  | 1.05 (0.73-1.51) | 0.79 |
| Recurrent stroke           | 1.00 (reference) | 1.24 (0.80-1.90)      | 0.34  | 1.04 (0.68-1.58) | 0.87 |
| Death                      | 1.00 (reference) | 0.48 (0.26-0.90)      | 0.020 | 0.77 (0.49-1.20) | 0.25 |

Abbreviations: CI=confidence interval; HR=hazard ratio

**eTable 22.** Univariate Comparison Between Baseline Characteristics and ASCOD Grades O1-1 or O2-D2 vs O0-D0

|                                                                   | <b>O0/D0<br/>(n=3392)</b> | <b>O1/D1 or O2/D2<br/>(n=206)</b> | <b>P-value</b> |
|-------------------------------------------------------------------|---------------------------|-----------------------------------|----------------|
| Age-yr, mean (SD)                                                 | 67.1 (13.1)               | 61.5 (14.1)                       | <0.001         |
| Male sex - no/total no, (%)                                       | 1403/3388 (41.4)          | 95/206 (46.1)                     | 0.19           |
| Ethnicity                                                         |                           |                                   | 0.12           |
| Asian                                                             | 757/3392 (22.3)           | 36/206 (17.5)                     |                |
| Non-Asian                                                         | 2635/3392 (77.7)          | 170/206 (82.5)                    |                |
| Qualifying event                                                  |                           |                                   | 0.001          |
| Stroke                                                            | 1419/3287 (43.2)          | 63/202 (31.2)                     |                |
| TIA                                                               | 1868/3287 (56.8)          | 139/202 (68.8)                    |                |
| <b>Medical history - no/total no, (%)</b>                         |                           |                                   |                |
| Hypertension                                                      | 2415/3385 (71.3)          | 125/206 (60.7)                    | 0.001          |
| Diabetes                                                          | 661/3378 (19.6)           | 26/206 (12.6)                     | 0.014          |
| Dyslipidemia                                                      | 2434/3392 (71.8)          | 115/206 (55.8)                    | <0.001         |
| Smoke - no/total no, (%)                                          |                           |                                   | 0.50           |
| Never                                                             | 1812/3349 (54.1)          | 105/205 (51.2)                    |                |
| Former                                                            | 825/3349 (24.6)           | 58/205 (28.3)                     |                |
| Current                                                           | 712/3349 (21.3)           | 42/205 (20.5)                     |                |
| Regular alcohol consumption                                       | 684/3350 (20.4)           | 48/205 (23.4)                     | 0.30           |
| Regular physical activity                                         | 706/3301 (21.4)           | 61/203 (30.1)                     | 0.004          |
| Stroke or TIA                                                     | 587/3392 (17.3)           | 32/206 (15.5)                     | 0.51           |
| Coronary artery disease                                           | 438/3380 (13.0)           | 17/204 (8.3)                      | 0.054          |
| Peripheral artery disease                                         | 103/3369 (3.1)            | 7/203 (3.5)                       | 0.75           |
| Atrial fibrillation or flutter                                    | 304/3382 (9.0)            | 10/205 (4.9)                      | 0.043          |
| Congestive heart failure                                          | 99/3382 (2.9)             | 4/205 (2.0)                       | 0.42           |
| Clinically significant valvular disease or prosthetic heart valve | 96/3392 (2.8)             | 4/206 (1.9)                       | 0.45           |
| Atherogenic dyslipidemia <sup>(1)</sup>                           | 238/2725 (8.7)            | 19/191 (10.0)                     | 0.57           |



|                                                      |                    |                    |        |
|------------------------------------------------------|--------------------|--------------------|--------|
| Atherogenic dyslipidemia <sup>(2)</sup>              | 561/2726 (20.6)    | 48/191 (25.1)      | 0.13   |
| Diabetes and Atherogenic dyslipidemia <sup>(2)</sup> | 176/3386 (5.2)     | 8/206 (3.9)        | 0.41   |
| Body-mass index, mean (SD)                           | 26.3 (4.5)         | 26.6 (5.1)         | 0.30   |
| <b>Blood pressure-mm Hg</b>                          |                    |                    |        |
| Systolic, mean (SD)                                  | 146 (24)           | 138 (51)           | <0.001 |
| Diastolic, mean (SD)                                 | 81 (13)            | 80 (13)            | 0.24   |
| Glucose-mg/dl, median (IQR)                          | 103 (90-128)       | 108 (92-167)       | 0.001  |
| <b>Cholesterol- mg/dl</b>                            |                    |                    |        |
| LDL, mean (SD)                                       | 118 (41)           | 122 (38)           | 0.20   |
| HDL, mean (SD)                                       | 51 (16)            | 52 (16)            | 0.44   |
| Triglyceride, median(IQR), mg/dl                     | 115.0 (87.0-162.0) | 133.0 (91.0-188.0) | 0.005  |
| <b>Socio-economic factors - no/total no, (%)</b>     |                    |                    |        |
| Living alone                                         | 1141/3334 (34.2)   | 61/206 (29.6)      | 0.18   |
| Living in rural area                                 | 356/3347 (10.6)    | 65/206 (31.6)      | <0.001 |
| Unemployed                                           | 165/3286 (5.0)     | 13/206 (6.3)       | 0.41   |
| Educational level                                    |                    |                    | 0.001  |
| No education                                         | 147/3159 (4.6)     | 3/199 (1.5)        |        |
| Primary education                                    | 988/3159 (31.3)    | 42/199 (21.1)      |        |
| Secondary education                                  | 1482/3159 (46.9)   | 114/199 (57.3)     |        |
| Tertiary education                                   | 542/3159 (17.2)    | 40/199 (20.1)      |        |
| TOAST classification                                 |                    |                    | <0.001 |
| Large artery atherosclerosis                         | 807/3151 (25.6)    | 1/203 (0.5)        |        |
| Small vessel disease                                 | 718/3151 (22.8)    | 4/203 (2.0)        |        |
| Cardioembolism                                       | 525/3151 (16.7)    | 0/203 (0.0)        |        |
| Other determined cause                               | 0/3151 (0.0)       | 196/206 (96.5)     |        |
| Undetermined                                         | 1101/3151 (34.9)   | 2/203 (1.0)        |        |
| ABCD2 score                                          |                    |                    | <0.001 |
| 0-3                                                  | 935/3033 (30.8)    | 104/192 (54.2)     |        |

|                  |                  |                |        |
|------------------|------------------|----------------|--------|
| 4-5              | 1476/3033 (48.7) | 67/192 (34.9)  |        |
| 6-7              | 622/3033 (20.5)  | 21/192 (10.9)  |        |
| Acute infarction |                  |                | 0.002  |
| No               | 1735/3287 (52.8) | 132/202 (65.3) |        |
| Single           | 1011/3287 (30.8) | 46/202 (22.8)  |        |
| Multiple         | 541/3287 (16.4)  | 24/202 (11.9)  |        |
| PICO's score     |                  |                | <0.001 |
| 0                | 2189/3392 (64.5) | 161/206 (78.2) |        |
| 1                | 987/3392 (29.1)  | 35/260 (17.0)  |        |
| ≥2               | 216/3392 (6.4)   | 10/206 (4.8)   |        |

---

**eTable 23.** Multivariable Association Between Baseline Characteristics and ASCOD Grades O1-D1 or O2-D2 vs ASCOD Grade O0-D0

|                                      | <b>OR (95%CI)</b> | <b>P-value</b> |
|--------------------------------------|-------------------|----------------|
| Living in rural area                 | 3.52 (2.55-4.87)  | <0.001         |
| ABCD2 score                          |                   |                |
| 0-3                                  | 1.00 (ref.)       | -              |
| 4-5                                  | 0.56 (0.40-0.79)  | 0.001          |
| 6-7                                  | 0.53 (0.31-0.90)  | 0.019          |
| Dyslipidemia                         | 0.62 (0.46-0.84)  | 0.002          |
| Age, per 10 years increase           | 0.86 (0.77-0.96)  | 0.006          |
| Triglycerides, per 86 mg/dL increase | 1.17 (1.03-1.32)  | 0.012          |
| Systolic, per 24 mm Hg increase      | 0.82 (0.69-0.98)  | 0.025          |

**eTable 24.** Univariate Comparison Between Baseline Characteristics and ASCOD Grades O1-D1 or O2-D2 or O3-D3 vs O0-D0

|                                                                   | <b>O0/D0<br/>(n=3392)</b> | <b>O1/D1 or O2/D2 or<br/>O0/D3<br/>(n=455)</b> | <b>P-value</b> |
|-------------------------------------------------------------------|---------------------------|------------------------------------------------|----------------|
| Age-yr, mean (SD)                                                 | 67.1 (13.1)               | 61.5 (13.2)                                    | <0.001         |
| Male sex - no/total no, (%)                                       | 1403/3388 (41.4)          | 143/453 (31.6)                                 | <0.001         |
| Ethnicity                                                         |                           |                                                | 0.014          |
| Asian                                                             | 757/3392 (22.3)           | 125/455 (27.5)                                 |                |
| Non-Asian                                                         | 2635/3392 (77.7)          | 330/455 (72.5)                                 |                |
| Qualifying event                                                  |                           |                                                | 0.53           |
| Stroke                                                            | 1419/3287 (43.2)          | 169/407 (41.5)                                 |                |
| TIA                                                               | 1868/3287 (56.8)          | 238/407 (58.5)                                 |                |
| <b>Medical history - no/total no, (%)</b>                         |                           |                                                |                |
| Hypertension                                                      | 2415/3385 (71.3)          | 292/452 (64.6)                                 | 0.003          |
| Diabetes                                                          | 661/3378 (19.6)           | 66/454 (14.5)                                  | 0.010          |
| Dyslipidemia                                                      | 2434/3392 (71.8)          | 275/455 (60.4)                                 | <0.001         |
| Smoke - no/total no, (%)                                          |                           |                                                | 0.005          |
| Never                                                             | 1812/3349 (54.1)          | 212/452 (46.9)                                 |                |
| Former                                                            | 825/3349 (24.6)           | 117/452 (25.9)                                 |                |
| Current                                                           | 712/3349 (21.3)           | 123/452 (27.2)                                 |                |
| Regular alcohol consumption                                       | 684/3350 (20.4)           | 114/451 (25.3)                                 | 0.017          |
| Regular physical activity                                         | 706/3301 (21.4)           | 95/411 (23.1)                                  | 0.42           |
| Stroke or TIA                                                     | 587/3392 (17.3)           | 71/455 (15.6)                                  | 0.37           |
| Coronary artery disease                                           | 438/3380 (13.0)           | 43/453 (9.5)                                   | 0.037          |
| Peripheral artery disease                                         | 103/3369 (3.1)            | 10/450 (2.2)                                   | 0.33           |
| Atrial fibrillation or flutter                                    | 304/3382 (9.0)            | 31/454 (6.8)                                   | 0.13           |
| Congestive heart failure                                          | 99/3382 (2.9)             | 10/454 (2.2)                                   | 0.38           |
| Clinically significant valvular disease or prosthetic heart valve | 96/3392 (2.8)             | 9/455 (2.0)                                    | 0.29           |
| Atherogenic dyslipidemia <sup>(1)</sup>                           | 238/2725 (8.7)            | 34/366 (9.3)                                   | 0.72           |
| Atherogenic dyslipidemia <sup>(2)</sup>                           | 561/2726 (20.6)           | 94/367 (25.6)                                  | 0.037          |
| Diabetes and Atherogenic dyslipidemia <sup>(2)</sup>              | 176/3386 (5.2)            | 21/454 (4.6)                                   | 0.60           |
| Body-mass index, mean (SD)                                        | 26.3 (4.5)                | 26.9 (5.1)                                     | 0.010          |
| <b>Blood pressure-mm Hg</b>                                       |                           |                                                |                |
| Systolic, mean (SD)                                               | 146 (24)                  | 145 (23)                                       | 0.19           |
| Diastolic, mean (SD)                                              | 81 (13)                   | 83 (14)                                        | 0.002          |
| Glucose-mg/dl, median (IQR)                                       | 103 (90-128)              | 104 (92-135)                                   | 0.042          |
| <b>Cholesterol- mg/dl</b>                                         |                           |                                                |                |
| LDL, mean (SD)                                                    | 118 (41)                  | 125 (40)                                       | 0.003          |
| HDL, mean (SD)                                                    | 51 (16)                   | 49 (14)                                        | 0.039          |
| Triglyceride, median(IQR), mg/dl                                  | 115.0 (87.0-162.0)        | 135.0 (97.0-180.0)                             | <0.001         |

**Socio-economic factors - no/total no, (%)**

|                              |                  |                |        |
|------------------------------|------------------|----------------|--------|
| Living alone                 | 1141/3334 (34.2) | 127/439 (28.9) | 0.027  |
| Living in rural area         | 356/3347 (10.6)  | 98/416 (23.6)  | <0.001 |
| Unemployed                   | 165/3286 (5.0)   | 30/412 (7.3)   | 0.053  |
| Educational level            |                  |                | 0.002  |
| No education                 | 147/3159 (4.6)   | 12/397 (3.0)   |        |
| Primary education            | 988/3159 (31.3)  | 92/397 (23.2)  |        |
| Secondary education          | 1482/3159 (46.9) | 215/397 (54.2) |        |
| Tertiary education           | 542/3159 (17.2)  | 78/397 (19.6)  |        |
| TOAST classification         |                  |                | <0.001 |
| Large artery atherosclerosis | 807/3151 (25.6)  | 69/407 (16.9)  |        |
| Small vessel disease         | 718/3151 (22.8)  | 44/107 (10.8)  |        |
| Cardioembolism               | 525/3151 (16.7)  | 37/407 (9.1)   |        |
| Other determined cause       | 0/3151 (0.0)     | 196/407 (48.2) |        |
| Undetermined                 | 1101/3151 (34.9) | 61/407 (15.0)  |        |
| ABCD2 score                  |                  |                | <0.001 |
| 0-3                          | 935/3033 (30.8)  | 168/384 (43.7) |        |
| 4-5                          | 1476/3033 (48.7) | 165/384 (43.0) |        |
| 6-7                          | 622/3033 (20.5)  | 51/384 (13.3)  |        |
| Acute infarction             |                  |                | 0.40   |
| No                           | 1735/3287 (52.8) | 229/407 (56.3) |        |
| Single                       | 1011/3287 (30.8) | 114/407 (28.0) |        |
| Multiple                     | 541/3287 (16.4)  | 64/407 (15.7)  |        |
| PICO's score                 |                  |                | <0.001 |
| 0                            | 2189/3392 (64.5) | 365/455 (80.2) |        |
| 1                            | 987/3392 (29.1)  | 74/455 (16.3)  |        |
| ≥2                           | 216/3392 (6.4)   | 16/455 (3.5)   |        |

**eTable 25.** Multivariable Association Between Baseline Characteristics and ASCOD Grades O1-D1 or O2-D2 or O3-D3 vs O0-D0

|                                      | <b>OR (95%CI)</b> | <b>P-value</b> |
|--------------------------------------|-------------------|----------------|
| Living in rural area                 | 2.55 (1.95-3.32)  | <0.001         |
| Age, per 10 years increase           | 0.85 (0.78-0.93)  | <0.001         |
| PICO's score                         |                   |                |
| 0                                    | 1.00 (ref.)       | -              |
| 1                                    | 0.60 (0.46-0.80)  | <0.001         |
| ≥2                                   | 0.62 (0.37-1.07)  | 0.084          |
| Male sex                             | 1.48 (1.19-1.85)  | 0.001          |
| Dyslipidemia                         | 0.69 (0.55-0.85)  | 0.001          |
| Ethnicity                            |                   |                |
| Non-Asian                            | 1.00 (ref.)       | -              |
| Asian                                | 1.47 (1.16-1.86)  | 0.002          |
| ABCD2 score                          |                   |                |
| 0-3                                  | 1.00 (ref.)       | -              |
| 4-5                                  | 0.75 (0.59-0.95)  | 0.020          |
| 6-7                                  | 0.61 (0.43-0.87)  | 0.006          |
| Triglycerides, per 86 mg/dL increase | 1.12 (1.02-1.23)  | 0.016          |
| LDL, per 40 mg/dL increase           | 1.13 (1.02-1.26)  | 0.022          |
| Diastolic, per 13 mm Hg increase     | 1.12 (1.01-1.25)  | 0.029          |

**eTable 26.** Univariate Comparison Between Baseline Characteristics and ASCOD Grades O1-D1 or O2-D2 vs A0, S0, C0, O0, and D0

|                                                                      | <b>A0/S0/C0/OD0<br/>(n=484)</b> | <b>O1/D1 or O2/D2<br/>(n=206)</b> | <b>P-value</b> |
|----------------------------------------------------------------------|---------------------------------|-----------------------------------|----------------|
| Age-yr, mean (SD)                                                    | 58.4 (14.7)                     | 61.5 (14.1)                       | 0.012          |
| Male sex - no/total no, (%)                                          | 250/482 (51.9)                  | 95/206 (46.1)                     | 0.63           |
| Ethnicity                                                            |                                 |                                   | 0.76           |
| Asian                                                                | 80/484 (16.5)                   | 36/206 (17.5)                     |                |
| Non-Asian                                                            | 404/484 (83.5)                  | 170/206 (82.5)                    |                |
| Qualifying event                                                     |                                 |                                   | 0.078          |
| Stroke                                                               | 106/432 (24.5)                  | 63/202 (31.2)                     |                |
| TIA                                                                  | 326/432 (75.5)                  | 139/202 (68.8)                    |                |
| <b>Medical history - no/total no, (%)</b>                            |                                 |                                   |                |
| Hypertension                                                         | 240/481 (49.9)                  | 125/206 (60.7)                    | 0.010          |
| Diabetes                                                             | 59/480 (12.3)                   | 26/206 (12.6)                     | 0.90           |
| Dyslipidemia                                                         | 287/448 (59.3)                  | 115/206 (55.8)                    | 0.40           |
| Smoke - no/total no, (%)                                             |                                 |                                   | 0.043          |
| Never                                                                | 273/475 (57.5)                  | 105/205 (51.2)                    |                |
| Former                                                               | 93/475 (19.6)                   | 58/205 (28.3)                     |                |
| Current                                                              | 109/475 (22.9)                  | 42/205 (20.5)                     |                |
| Regular alcohol consumption                                          | 75/477 (15.7)                   | 48/205 (23.4)                     | 0.017          |
| Regular physical activity                                            | 148/467 (31.7)                  | 61/203 (30.1)                     | 0.67           |
| Stroke or TIA                                                        | 46/484 (9.5)                    | 32/206 (15.5)                     | 0.022          |
| Coronary artery disease                                              | 0/480 (0.0)                     | 17/204 (8.3)                      | <0.001         |
| Peripheral artery disease                                            | 0/474 (0.0)                     | 7/203 (3.5)                       | <0.001         |
| Atrial fibrillation or flutter                                       | 4/482 (0.8)                     | 10/205 (4.9)                      | 0.001          |
| Congestive heart failure                                             | 0/482 (0.0)                     | 4/205 (2.0)                       | 0.008          |
| Clinically significant valvular disease<br>or prosthetic heart valve | 3/484 (0.6)                     | 4/206 (1.9)                       | 0.21           |
| Atherogenic dyslipidemia <sup>(1)</sup>                              | 28/349 (8.0)                    | 19/191 (10.0)                     | 0.45           |
| Atherogenic dyslipidemia <sup>(2)</sup>                              | 67/349 (19.2)                   | 48/191 (25.1)                     | 0.11           |
| Diabetes and Atherogenic dyslipidemia <sup>(2)</sup>                 | 15/482 (3.1)                    | 8/206 (3.9)                       | 0.61           |
| Body-mass index, mean (SD)                                           | 26.4 (4.7)                      | 26.6 (5.1)                        | 0.60           |
| <b>Blood pressure-mm Hg</b>                                          |                                 |                                   |                |
| Systolic, mean (SD)                                                  | 140 (22)                        | 138 (51)                          | 0.52           |
| Diastolic, mean (SD)                                                 | 81 (12)                         | 80 (13)                           | 0.41           |
| Glucose-mg/dl, median (IQR)                                          | 99 (90-121)                     | 108 (92-167)                      | 0.001          |
| <b>Cholesterol- mg/dl</b>                                            |                                 |                                   |                |
| LDL, mean (SD)                                                       | 125 (42)                        | 122 (38)                          | 0.49           |
| HDL, mean (SD)                                                       | 53 (19)                         | 52 (16)                           | 0.42           |
| Triglyceride, median(IQR), mg/dl                                     | 115.0 (82.0-161.0)              | 133.0 (91.0-<br>188.0)            | 0.007          |
| <b>Socio-economic factors - no/total no,<br/>(%)</b>                 |                                 |                                   |                |
| Living alone                                                         | 145/468 (31.0)                  | 61/206 (29.6)                     | 0.72           |
| Living in rural area                                                 | 51/465 (11.0)                   | 65/206 (31.6)                     | <0.001         |

|                              |                 |                |        |
|------------------------------|-----------------|----------------|--------|
| Unemployed                   | 35/459 (7.6)    | 13/206 (6.3)   | 0.54   |
| Educational level            |                 |                | 0.11   |
| No education                 | 14/434 (3.2)    | 3/199 (1.5)    |        |
| Primary education            | 113/434 (26.0)  | 42/199 (21.1)  |        |
| Secondary education          | 206/434 (47.5)  | 114/199 (57.3) |        |
| Tertiary education           | 101/424 (23.3)  | 40/199 (20.1)  |        |
| TOAST classification         |                 |                | <0.001 |
| Large artery atherosclerosis | 54/395 (13.7)   | 1/203 (0.5)    |        |
| Small vessel disease         | 0/395 (0.0)     | 4/203 (2.0)    |        |
| Cardioembolism               | 0/395 (0.0)     | 0/203 (0.0)    |        |
| Other determined cause       | 0/395 (0.0)     | 196/206 (96.5) |        |
| Undetermined                 | 341/395 (86.3)  | 2/203 (1.0)    |        |
| ABCD2 score                  |                 |                | 0.56   |
| 0-3                          | 208/418 (49.8)  | 104/192 (54.2) |        |
| 4-5                          | 164/418 (39.2)  | 67/192 (34.9)  |        |
| 6-7                          | 46/418 (11.0)   | 21/192 (10.9)  |        |
| Acute infarction             |                 |                | 0.028  |
| No                           | 322/432 (74.5)  | 132/202 (65.3) |        |
| Single                       | 81/432 (18.8)   | 46/202 (22.8)  |        |
| Multiple                     | 29/432 (6.7)    | 24/202 (11.9)  |        |
| PICO's score                 |                 |                | <0.001 |
| 0                            | 484/484 (100.0) | 161/206 (78.2) |        |
| 1                            | 0/484 (0.0)     | 35/206 (17.0)  |        |
| ≥2                           | 0/484 (0.0)     | 10/206 (4.8)   |        |



**eTable 27.** Univariate Comparison Between Baseline Characteristics and ASCOD Grades O1-D1 or O2-D2 or O3-D3 vs A0, S0, C0, O0, or D0

|                                                                      | <b>A0/S0/C0/OD0<br/>(n=484)</b> | <b>O1/D1 or O2/D2<br/>or O0/D3<br/>(n=455)</b> | <b>P-value</b> |
|----------------------------------------------------------------------|---------------------------------|------------------------------------------------|----------------|
| Age-yr, mean (SD)                                                    | 58.4 (14.7)                     | 61.5 (13.2)                                    | 0.001          |
| Male sex - no/total no, (%)                                          | 250/482 (51.9)                  | 143/453 (31.6)                                 | <0.001         |
| Ethnicity                                                            |                                 |                                                | <0.001         |
| Asian                                                                | 80/484 (16.5)                   | 125/455 (27.5)                                 |                |
| Non-Asian                                                            | 404/484 (83.5)                  | 330/455 (72.5)                                 |                |
| Qualifying event                                                     |                                 |                                                | <0.001         |
| Stroke                                                               | 106/432 (24.5)                  | 169/407 (41.5)                                 |                |
| TIA                                                                  | 326/432 (75.5)                  | 238/407 (58.5)                                 |                |
| <b>Medical history - no/total no, (%)</b>                            |                                 |                                                |                |
| Hypertension                                                         | 240/481 (49.9)                  | 292/452 (64.6)                                 | <0.001         |
| Diabetes                                                             | 59/480 (12.3)                   | 66/454 (14.5)                                  | 0.31           |
| Dyslipidemia                                                         | 287/448 (59.3)                  | 275/455 (60.4)                                 | 0.72           |
| Smoke - no/total no, (%)                                             |                                 |                                                | 0.005          |
| Never                                                                | 273/475 (57.5)                  | 212/452 (46.9)                                 |                |
| Former                                                               | 93/475 (19.6)                   | 117/452 (25.9)                                 |                |
| Current                                                              | 109/475 (22.9)                  | 123/452 (27.2)                                 |                |
| Regular alcohol consumption                                          | 75/477 (15.7)                   | 114/451 (25.3)                                 | <0.001         |
| Regular physical activity                                            | 148/467 (31.7)                  | 95/411 (23.1)                                  | 0.005          |
| Stroke or TIA                                                        | 46/484 (9.5)                    | 71/455 (15.6)                                  | 0.005          |
| Coronary artery disease                                              | 0/480 (0.0)                     | 43/453 (9.5)                                   | <0.001         |
| Peripheral artery disease                                            | 0/474 (0.0)                     | 10/450 (2.2)                                   | 0.001          |
| Atrial fibrillation or flutter                                       | 4/482 (0.8)                     | 31/454 (6.8)                                   | <0.001         |
| Congestive heart failure                                             | 0/482 (0.0)                     | 10/454 (2.2)                                   | 0.001          |
| Clinically significant valvular disease<br>or prosthetic heart valve | 3/484 (0.6)                     | 9/455 (2.0)                                    | 0.064          |
| Atherogenic dyslipidemia <sup>(1)</sup>                              | 28/349 (8.0)                    | 34/366 (9.3)                                   | 0.55           |
| Atherogenic dyslipidemia <sup>(2)</sup>                              | 67/349 (19.2)                   | 94/367 (25.6)                                  | 0.040          |
| Diabetes and Atherogenic dyslipidemia <sup>(2)</sup>                 | 15/482 (3.1)                    | 21/454 (4.6)                                   | 0.23           |
| Body-mass index, mean (SD)                                           | 26.4 (4.7)                      | 26.9 (5.1)                                     | 0.14           |
| <b>Blood pressure-mm Hg</b>                                          |                                 |                                                |                |
| Systolic, mean (SD)                                                  | 140 (22)                        | 145 (23)                                       | 0.001          |
| Diastolic, mean (SD)                                                 | 81 (12)                         | 83 (14)                                        | 0.005          |
| Glucose-mg/dl, median (IQR)                                          | 99 (90-121)                     | 104 (92-135)                                   | 0.027          |
| <b>Cholesterol- mg/dl</b>                                            |                                 |                                                |                |
| LDL, mean (SD)                                                       | 125 (42)                        | 125 (40)                                       | 0.89           |
| HDL, mean (SD)                                                       | 53 (19)                         | 49 (14)                                        | 0.002          |
| Triglyceride, median(IQR), mg/dl                                     | 115.0 (82.0-161.0)              | 135.0 (97.0-180.0)                             | <0.001         |
| <b>Socio-economic factors - no/total no,<br/>(%)</b>                 |                                 |                                                |                |

|                              |                 |                |        |
|------------------------------|-----------------|----------------|--------|
| Living alone                 | 145/468 (31.0)  | 127/439 (28.9) | 0.50   |
| Living in rural area         | 51/465 (11.0)   | 98/416 (23.6)  | <0.001 |
| Unemployed                   | 35/459 (7.6)    | 30/412 (7.3)   | 0.85   |
| Educational level            |                 |                | 0.28   |
| No education                 | 14/434 (3.2)    | 12/397 (3.0)   |        |
| Primary education            | 113/434 (26.0)  | 92/397 (23.2)  |        |
| Secondary education          | 206/434 (47.5)  | 215/397 (54.2) |        |
| Tertiary education           | 101/424 (23.3)  | 78/397 (19.6)  |        |
| TOAST classification         |                 |                | <0.001 |
| Large artery atherosclerosis | 54/395 (13.7)   | 69/407 (16.9)  |        |
| Small vessel disease         | 0/395 (0.0)     | 44/107 (10.8)  |        |
| Cardioembolism               | 0/395 (0.0)     | 37/407 (9.1)   |        |
| Other determined cause       | 0/395 (0.0)     | 196/407 (48.2) |        |
| Undetermined                 | 341/395 (86.3)  | 61/407 (15.0)  |        |
| ABCD2 score                  |                 |                | 0.21   |
| 0-3                          | 208/418 (49.8)  | 168/384 (43.7) |        |
| 4-5                          | 164/418 (39.2)  | 165/384 (43.0) |        |
| 6-7                          | 46/418 (11.0)   | 51/384 (13.3)  |        |
| Acute infarction             |                 |                | <0.001 |
| No                           | 322/432 (74.5)  | 229/407 (56.3) |        |
| Single                       | 81/432 (18.8)   | 114/407 (28.0) |        |
| Multiple                     | 29/432 (6.7)    | 64/407 (15.7)  |        |
| PICO's score                 |                 |                | <0.001 |
| 0                            | 484/484 (100.0) | 365/455 (80.2) |        |
| 1                            | 0/484 (0.0)     | 74/455 (16.3)  |        |
| ≥2                           | 0/484 (0.0)     | 16/455 (3.5)   |        |

**eTable 28.** Five-Year Event Rates and Effect Sizes According to ASCOD Cross-Grades

|                                   | A0/S0/C0/O0/D0<br>(n=484) | A0<br>(n=1406)            | A1/A2<br>(n=998)             | A1/A2/A3<br>(n=2106)          |
|-----------------------------------|---------------------------|---------------------------|------------------------------|-------------------------------|
| <b>Major cardiovascular event</b> |                           | 101 (7.7; 6.3 to 9.2)     | 189 (19.8; 17.4 to 22.4)     | 144 (13.8; 11.8 to 16.0)      |
| S0                                |                           | 55/897 (6.5; 5.0 to 8.3)  | 95/504 (19.6; 16.2 to 23.2)  | 162/1065 (15.9; 13.7 to 18.2) |
| SHR (95% CI)                      |                           | -                         | 4.81 (2.97-7.80)***          | 3.84 (2.41-6.11)***           |
| S1/S2                             |                           | 29/323 (9.6; 6.6 to 13.3) | 16/110 (16.1; 9.6 to 24.1)   | 46/380 (13.1; 9.8 to 16.8)    |
| SHR (95% CI)                      |                           | 2.21 (1.25-3.90)**        | 3.71 (1.93-7.13)***          | 3.06 (1.81-5.17)***           |
| S1/S2/S3                          | 20 (4.4)                  | 45/501 (9.7; 7.2 to 12.6) | 94/489 (20.3; 16.8 to 24.1)  | 169/1028 (17.6; 15.2 to 20.1) |
| SHR (95% CI)                      | (2.8 to 6.5)              | 2.20 (1.30-3.72)**        | 4.96 (3.06-8.05)***          | 4.23 (2.66-6.74)***           |
| C0                                |                           | 65/1028 (6.8; 5.3 to 8.5) | 130/702 (19.4; 16.5 to 22.5) | 224/1465 (16.2; 14.3 to 18.2) |
| SHR (95% CI)                      |                           | -                         | 4.74 (2.96-7.59)***          | 3.88 (2.45-6.14)***           |
| C1/C2                             |                           | 22/244 (9.7; 6.3 to 14.0) | 52/225 (24.2; 18.7 to 30.2)  | 94/479 (20.8; 17.1 to 24.6)   |
| SHR (95% CI)                      |                           | 2.23 (1.22-4.09)**        | 6.07 (3.62-10.17)***         | 5.14 (3.17-8.34)***           |
| C1/C2/C3                          |                           | 31/340 (9.7; 6.8 to 13.3) | 58/275 (22.1; 17.3 to 27.3)  | 103/597 (18.2; 15.2 to 21.5)  |
| SHR (95% CI)                      |                           | 2.25 (1.28-3.95)**        | 5.48 (3.30-9.11)***          | 4.47 (2.77-7.21)***           |
| <b>Recurrent stroke</b>           |                           | 75 (5.6)                  | 141 (14.7)                   | 108 (10.3)                    |
| S0                                |                           | 40/897 (4.7)              | 76/504 (15.6)                | 121/1065 (11.8)               |
| SHR (95% CI)                      |                           | -                         | 6.34 (3.45-11.67)***         | 4.73 (2.61-8.57)***           |
| S1/S2                             |                           | 23/323 (7.5)              | 11/110 (11.0)                | 38/380 (10.8)                 |
| SHR (95% CI)                      |                           | 2.92 (1.45-5.87)***       | 4.18 (1.85-9.45)***          | 4.18 (2.18-8.02)***           |
| S1/S2/S3                          | 12 (2.6)                  | 35/501 (7.4)              | 65/489 (13.9)                | 126/1028 (13.1)               |
| SHR (95% CI)                      |                           | 2.85 (1.48-5.50)***       | 5.59 (3.02-10.35)***         | 5.17 (2.86-9.38)***           |
| C0                                |                           | 43/1028 (4.4)             | 99/702 (14.7)                | 172/1465 (12.4)               |
| SHR (95% CI)                      |                           | -                         | 5.93 (3.26-10.81)***         | 4.91 (2.73-8.83)***           |
| C1/C2                             |                           | 20/244 (8.8)              | 35/225 (16.2)                | 63/479 (13.9)                 |
| SHR (95% CI)                      |                           | 3.39 (1.66-6.95)***       | 6.58 (3.41-12.69)***         | 5.57 (3.00-10.35)***          |
| C1/C2/C3                          |                           | 29/340 (9.0)              | 41/275 (15.5)                | 72/597 (12.7)                 |

|              |          |                     |                      |                     |
|--------------|----------|---------------------|----------------------|---------------------|
| SHR (95% CI) |          | 3.52 (1.90-6.91)*** | 6.29 (3.30-11.98)*** | 5.09 (2.76-9.38)*** |
| <b>Death</b> |          | 87 (6.8)            | 139 (15.0)           | 106 (10.5)          |
| S0           |          | 45/897 (5.5)        | 57/504 (12.1)        | 102/1065 (10.4)     |
| HR (95% CI)  |          | -                   | 2.72 (1.63-4.52)***  | 2.32 (1.44-3.74)**  |
| S1/S2        |          | 16/323 (5.4)        | 16/110 (16.4)        | 37/380 (11.0)       |
| HR (95% CI)  |          | 1.20 (0.62-2.31)    | 3.67 (1.90-7.08)***  | 2.41 (1.40-4.16)**  |
| S1/S2/S3     |          | 42/501 (9.2)        | 82/489 (18.2)        | 143/1028 (15.3)     |
| HR (95% CI)  | 20 (4.5) | 2.05 (1.21-3.50)**  | 4.23 (2.59-6.89)***  | 3.51 (2.20-5.61)*** |
| C0           |          | 54/1028 (5.8)       | 83/702 (12.8)        | 150/1465 (11.2)     |
| HR (95% CI)  |          | -                   | 2.88 (1.77-4.69)***  | 2.50 (1.57-3.99)*** |
| C1/C2        |          | 29/244 (13.3)       | 47/225 (22.6)        | 83/479 (19.0)       |
| HR (95% CI)  |          | 3.02 (1.71-5.33)*** | 5.36 (3.18-9.05)***  | 4.46 (2.74-7.27)*** |
| C1/C2/C3     |          | 29/340 (9.5)        | 52/275 (20.4)        | 89/597 (16.4)       |
| HR (95% CI)  |          | 2.11 (1.19-3.72)*   | 4.78 (2.86-8.01)***  | 3.78 (2.33-6.14)*** |

\*\*\* p-value <0.001; \*\* p-value <0.01; \* p-value <0.05

|                                   | <b>A0/S0/C0/O0/D0<br/>(n=484)</b> | <b>S0<br/>(n=2141)</b>       | <b>S1/S2<br/>(n=773)</b>   | <b>S1/S2/S3<br/>(n=912)</b>   |
|-----------------------------------|-----------------------------------|------------------------------|----------------------------|-------------------------------|
| <b>Major cardiovascular event</b> |                                   | 232 (11.4; 10.1 to 12.8)     | 80 (11.1; 8.9 to 13.6)     | 234 (14.9; 13.2to 16.7)       |
| C0                                |                                   | 144/1440 (10.6; 9.0 to 12.3) | 69/673 (10.9; 8.6 to 13.5) | 168/1282 (14.0; 12.1 to 16.0) |
| SHR (95% CI)                      | 20 (4.4)                          | -                            | 2.54 (1.54-4.18)***        | 3.29 (2.07-5.24)***           |
| C1/C2                             | (2.8 to 6.5)                      | 65/502 (13.6; 10.7 to 16.8)  | 7/42 (20.3; 8.7 to 35.3)   | 60/295 (21.9; 17.2 to 27.0)   |
| SHR (95% CI)                      |                                   | 3.27 (1.98-5.40)***          | 4.46 (1.92-10.39)***       | 5.36 (3.23-8.90)***           |
| C1/C2/C3                          |                                   | 79/639 (12.9; 10.4 to 15.7)  | 9/86 (12.3; 6.0 to 21.0)   | 64/383 (18.1; 14.2 to 22.3)   |
| SHR (95% CI)                      |                                   | 3.11 (1.90-5.07)***          | 2.68 (1.23-5.85)**         | 4.31 (2.61-7.13)***           |
| <b>Recurrent stroke</b>           |                                   | 172 (8.4)                    | 65 (9.0)                   | 171 (10.8)                    |
| C0                                |                                   | 105/1440 (7.7)               | 58/673 (9.1)               | 125/1282 (10.3)               |
| SHR (95% CI)                      | 12 (2.6)                          | -                            | 3.56 (1.91-6.63)***        | 4.05 (2.23-7.33)***           |
| C1/C2                             |                                   | 47/502 (9.8)                 | 3/42 (9.1)                 | 40/295 (14.5)                 |
| SHR (95% CI)                      |                                   | 3.89 (2.06-7.34)***          | 3.03 (0.87-10.54)          | 5.76 (3.02-11.00)***          |
| C1/C2/C3                          |                                   | 61/639 (9.9)                 | 5/86 (6.9)                 | 44/383 (12.4)                 |
| SHR (95% CI)                      |                                   | 3.97 (2.13-7.37)***          | 2.43 (0.86-6.86)           | 4.83 (2.55-9.16)***           |
| <b>Death</b>                      |                                   | 164 (8.4)                    | 62 (8.9)                   | 209 (13.6)                    |
| C0                                |                                   | 96/1440 (7.3)                | 54/673 (8.9)               | 135/1282 (11.5)               |
| HR (95% CI)                       | 20 (4.5)                          | -                            | 1.95 (1.17-3.27)*          | 2.60 (1.63-4.17)***           |
| C1/C2                             |                                   | 56/502 (12.3)                | 5/42 (14.7)                | 68/295 (25.6)                 |
| HR (95% CI)                       |                                   | 2.80 (1.68-4.66)***          | 3.15 (1.18-8.40)*          | 6.18 (3.75-10.18)***          |
| C1/C2/C3                          |                                   | 60/639 (10.3)                | 6/86 (8.3)                 | 71/383 (20.6)                 |
| HR (95% CI)                       |                                   | 2.32 (1.40-3.84)**           | 1.76 (0.71-4.38)           | 4.84 (2.94-7.94)***           |

\*\*\* p-value <0.001; \*\* p-value <0.01; \* p-value <0.05

**eTable 29.** Multivariable Association Between Baseline Characteristics and ASCOD Grades A1-A2 and A1-A2 and A3 vs A0, S0, C0, O0, or D0

|                                 | <b>A1/A2<br/>OR (95%CI)</b> | <b>P-value</b> | <b>A1/A2/A3<br/>OR (95%CI)</b> | <b>P-value</b> |
|---------------------------------|-----------------------------|----------------|--------------------------------|----------------|
| Age, per 10 years increase      | 1.66 (1.47-1.86)            | <0.001         | 1.73 (1.57-1.91)               | <0.001         |
| Acute infarction                |                             |                |                                |                |
| No                              | 1.00 (ref.)                 | -              | 1.00 (ref.)                    | -              |
| Single                          | 1.92 (1.39-2.66)            | <0.001         | 2.01 (1.51-2.67)               | <0.001         |
| Multiple                        | 3.58 (2.25-5.69)            | <0.001         | 2.78 (1.82-4.24)               | <0.001         |
| Hypertension                    | 2.22 (1.64-3.00)            | <0.001         | 1.99 (1.55-2.55)               | <0.001         |
| Dyslipidemia                    | 2.01 (1.49-2.71)            | <0.001         | 1.62 (1.27-2.07)               | <0.001         |
| Smoke                           |                             |                |                                |                |
| Never                           | 1.00 (ref.)                 | -              | 1.00 (ref.)                    | -              |
| Former                          | 1.59 (1.13-2.24)            | 0.008          | 1.55 (1.15-2.10)               | 0.004          |
| Current                         | 2.16 (1.51-3.11)            | <0.001         | 2.10 (1.54-2.86)               | <0.001         |
| Regular physical activity       | 0.55 (0.40-0.75)            | <0.001         | 0.57 (0.43-0.74)               | <0.001         |
| Atrial fibrillation or flutter  | 6.67 (2.34-19.04)           | <0.001         | 7.84 (2.85-21.56)              | <0.001         |
| Systolic, per 24 mm Hg increase | 1.28 (1.09-1.49)            | 0.002          | 1.17 (1.02-1.34)               | 0.023          |
| HDL, per 16 md/dL increase      | 0.81 (0.71-0.94)            | 0.004          | -                              | -              |
| Ethnicity                       |                             |                |                                |                |
| Non-Asian                       | 1.00 (ref.)                 | -              | -                              | -              |
| Asian                           | 1.60 (1.14-2.26)            | 0.007          | -                              | -              |
| Stroke or TIA                   | 1.65 (1.10-2.46)            | 0.015          | 1.54 (1.14-2.34)               | 0.007          |
| BMI                             | 0.96 (0.93-0.99)            | 0.021          |                                |                |
| Male sex                        | -                           | -              | 1.32 (1.05-1.68)               | 0.022          |
| Regular alcohol consumption     | 1.45 (1.02-2.07)            | 0.038          | 1.38 (1.01-1.89)               | 0.041          |

A1/A2 means extra- or intracranial atherosclerotic stenosis ipsilateral to the cerebral ischemia or aortic arch atheroma  $\geq 4$  mm or aortic arch thrombus, A3 means atherosclerotic disease in any vascular bed (extra- or intracranial ipsilateral atherosclerosis without luminal stenosis or atherosclerotic stenosis or plaque in any artery but not ipsilateral to the cerebral ischemia or aortic arch atheroma <4 mm).

**eTable 30.** Multivariable Association Between Baseline Characteristics and ASCOD Grades S1-S2 and S1-S2 and S3 vs A0, S0, C0, O0, or D0

|                                 | <b>S1/S2<br/>OR (95%CI)</b> | <b>P-value</b> | <b>S1/S2/S3<br/>OR (95%CI)</b> | <b>P-value</b> |
|---------------------------------|-----------------------------|----------------|--------------------------------|----------------|
| Acute infarction                |                             |                |                                |                |
| No                              | 1.00 (ref.)                 | -              | 1.00 (ref.)                    | -              |
| Single                          | 3.24 (2.33-4.49)            | <0.001         | 3.39 (2.45-4.69)               | <0.001         |
| Multiple                        | 1.77 (1.09-2.89)            | 0.022          | 1.83 (1.13-2.99)               | 0.015          |
| Regular physical activity       | 0.38 (0.27-0.54)            | <0.001         | 0.36 (0.26-0.52)               | <0.001         |
| Age, per 10 years increase      | 1.38 (1.23-1.55)            | <0.001         | 1.38 (1.23-1.55)               | <0.001         |
| Ethnicity                       |                             |                |                                |                |
| Non-Asian                       | 1.00 (ref.)                 | -              | 1.00 (ref.)                    | -              |
| Asian                           | 2.31 (1.66-3.21)            | <0.001         | 2.28 (1.64-3.17)               | <0.001         |
| Dyslipidemia                    | 1.77 (1.31-2.38)            | <0.001         | 1.76 (1.30-2.36)               | <0.001         |
| Hypertension                    | 1.63 (1.21-2.19)            | 0.001          | 1.65 (1.23-2.21)               | 0.001          |
| Systolic, per 24 mm Hg increase | 1.29 (1.10-1.52)            | 0.002          | 1.29 (1.10-1.51)               | 0.001          |
| Living alone                    | 1.52 (1.13-2.05)            | 0.006          | 1.43 (1.07-1.93)               | 0.018          |
| ABCD2 score                     |                             |                |                                |                |
| 0-3                             | 1.00 (ref.)                 | -              | 1.00 (ref.)                    | -              |
| 4-5                             | 1.45 (1.03-2.04)            | 0.034          | 1.49 (1.06-2.10)               | 0.024          |
| 6-7                             | 1.77 (1.13-2.76)            | 0.012          | 1.81 (1.16-2.83)               | 0.009          |
| Male sex                        | 1.38 (1.04-1.82)            | 0.025          | -                              | -              |
| Regular alcohol consumption     | -                           | -              | 1.44 (1.00-2.07)               | 0.050          |

S1/S2 means new small deep infarct of lacunar type, single (S2) or associated with old small deep infarct(s), and/or

Fazekas-3 leukoaraiosis, and/or microdeposit of hemosiderin (S1); S3 means Fazekas-3 leukoaraiosis, and/or multiple old lacunes, and/or microdeposit of hemosiderin.

**eTable 31.** Multivariable Association Between Baseline Characteristics and ASCOD Grades C1-C2 and C1-C2 and C3 vs A0, S0, C0, O0, or D0

|                                                                   | <b>OR (95%CI)</b> | <b>P-value</b> | <b>OR (95%CI)</b>  | <b>P-value</b> |
|-------------------------------------------------------------------|-------------------|----------------|--------------------|----------------|
| Age, per 10 years increase                                        | 1.51 (1.35-1.68)  | <0.001         | 1.34 (1.21-1.47)   | <0.001         |
| Atrial fibrillation or flutter                                    | 38.6 (14.0-106.1) | <0.001         | 27.03 (9.88-73.97) | <0.001         |
| Acute infarction                                                  |                   |                |                    |                |
| No                                                                | 1.00 (ref.)       | -              | 1.00 (ref.)        | -              |
| Single                                                            | 2.46 (1.73-3.50)  | <0.001         | 2.40 (1.76-3.29)   | <0.001         |
| Multiple                                                          | 3.91 (2.45-6.24)  | <0.001         | 3.13 (2.02-4.83)   | <0.001         |
| Hypertension                                                      | 1.81 (1.32-2.48)  | <0.001         | 1.47 (1.11-1.94)   | 0.006          |
| Clinically significant valvular disease or prosthetic heart valve | 9.32 (2.69-32.28) | <0.001         | 5.95 (1.77-20.03)  | 0.004          |
| Regular physical activity                                         | 0.56 (0.40-0.79)  | 0.001          | 0.71 (0.53-0.95)   | 0.019          |
| LDL, per 40 mg/dL increase                                        | 0.79 (0.66-0.94)  | 0.010          | 0.81 (0.70-0.94)   | 0.007          |
| Regular alcohol consumption                                       | 1.60 (1.09-2.36)  | 0.017          | 1.50 (1.07-2.11)   | 0.020          |
| Male sex                                                          | 1.42 (1.06-1.91)  | 0.021          | 1.39 (1.07-1.80)   | 0.013          |

C1/C2 means cardiac pathology likely causal (C1), e.g., atrial fibrillation, significant valve disease, endocarditis, or possibly causal (C2), e.g., intracardiac spontaneous echo contrast, apical akinesia with left ejection fraction >35%, patent foramen ovale with atrial septal aneurysm; C3 means one of the following abnormalities present in isolation: patent foramen ovale, atrial septal aneurysm, strands, mitral annulus calcification, calcification aortic valve, nonapical akinesia of the left ventricle, transient atrial fibrillation <60 s, atrial hyperexcitability.



**eFigure 1. Study Flowchart**

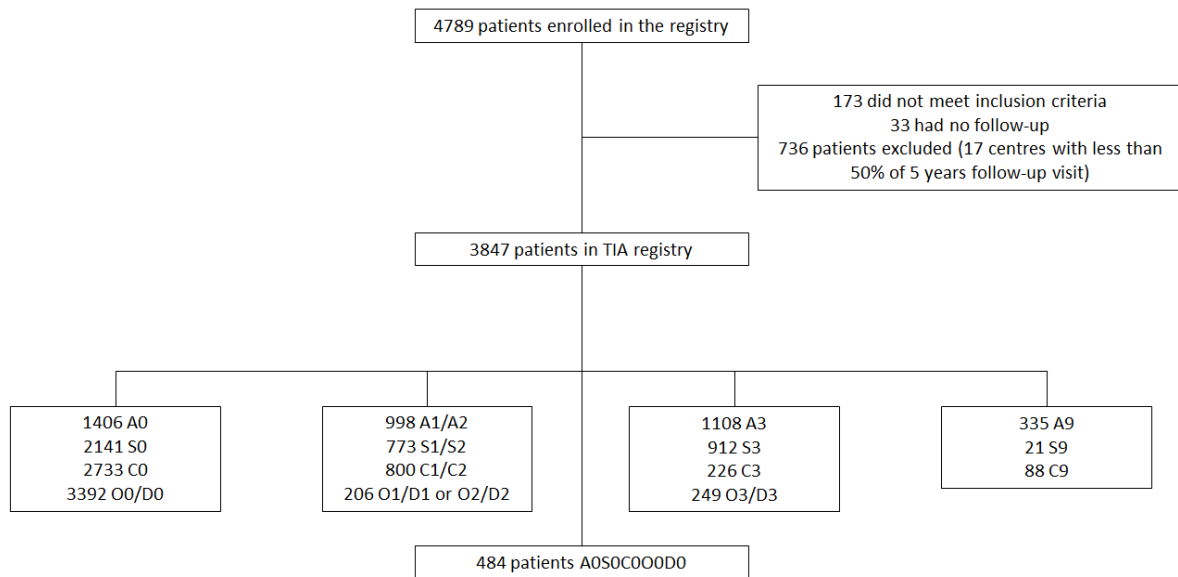

A: atherosclerosis, S: Small vessel disease, C: Cardiac pathology, O: Other causes, D: Dissection

0: disease is absent

1: disease is present, likely causal

2: disease is present, possibly causal

3: disease is present, unlikely causal

9: disease has not been assessed properly

**eFigure 2.** Venn Diagram Among Main ASCOD Diseases (Atherosclerosis, Small Vessel Disease, and Cardiac Pathology)

1: disease is present and potentially directly causal; 2: disease is present and possibly directly causal; 3: disease is present and not directly related with the stroke, e.g., contralateral to the ischemic field)

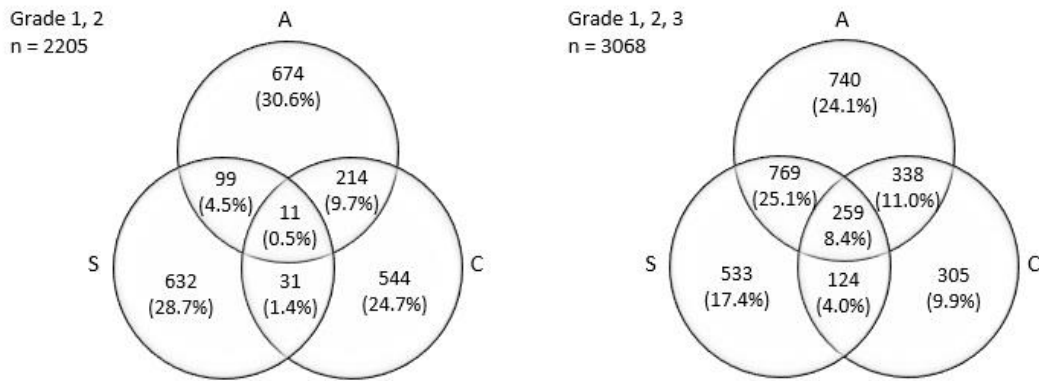

**eFigure 3.** Five-Year Cumulative Incidence of Recurrent Major Cardiovascular Event According to ASCOD Grades S0, S1-S2, and S3

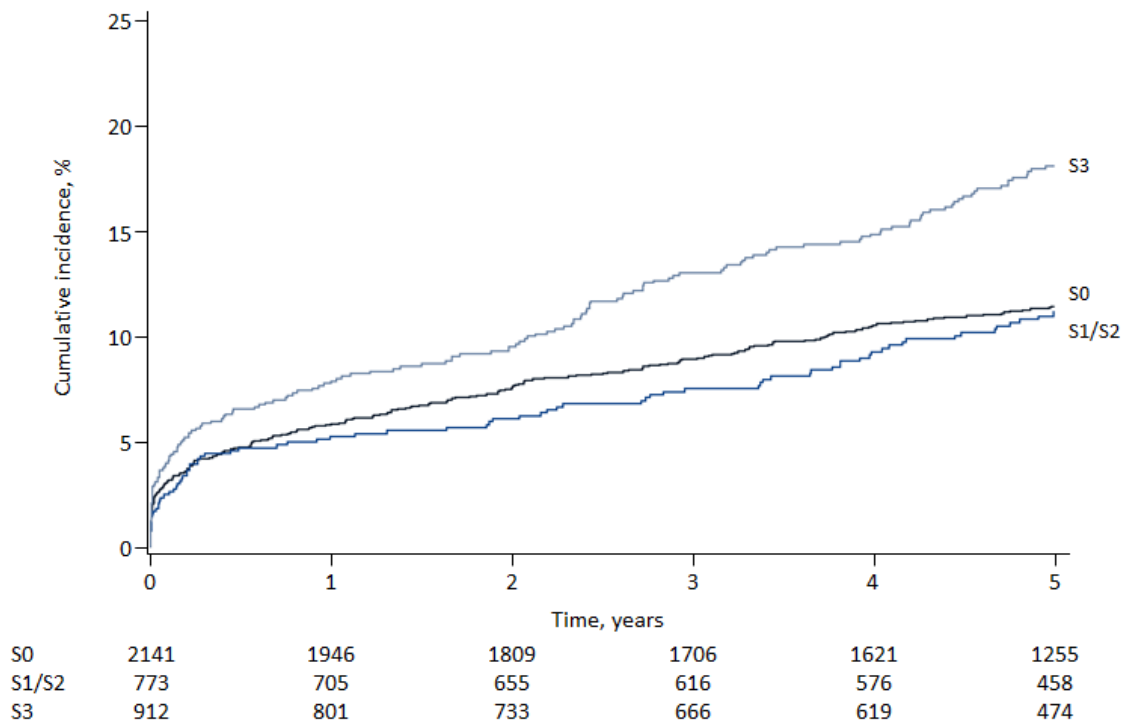

**eFigure 4.** LDL and Blood Pressure Evolution: Small Vessel Disease

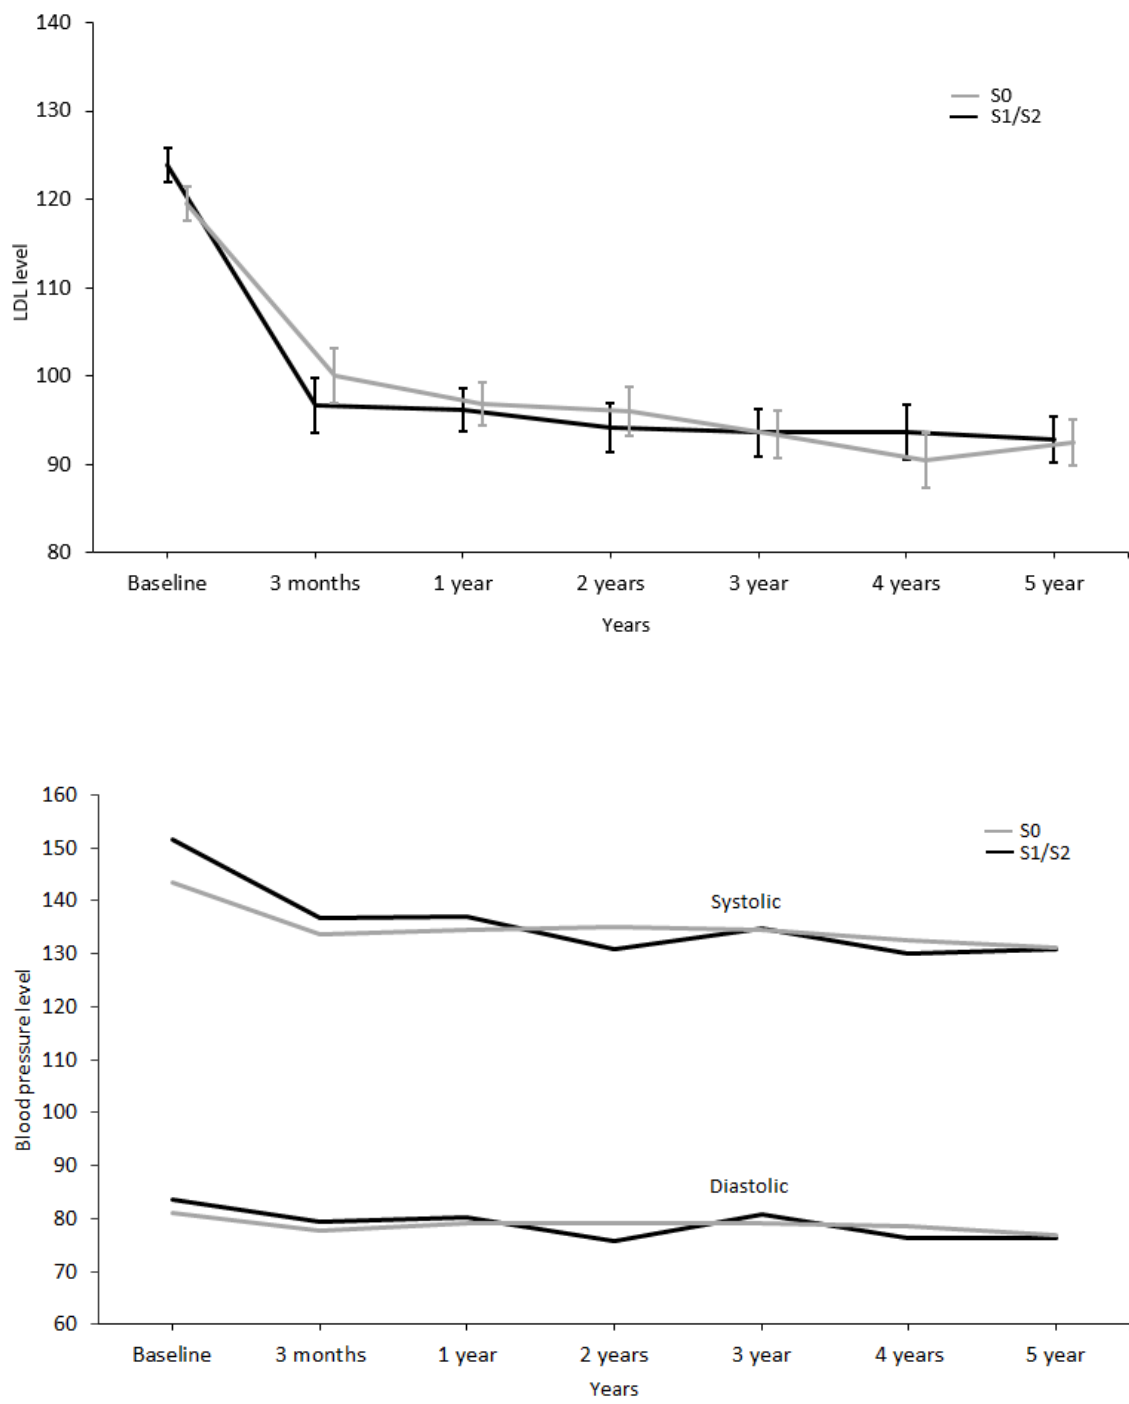

**eFigure 5.** Five-Year Cumulative Incidence of Recurrent Major Cardiovascular Event According to ASCOD Grades C0, C1-C2, and C3

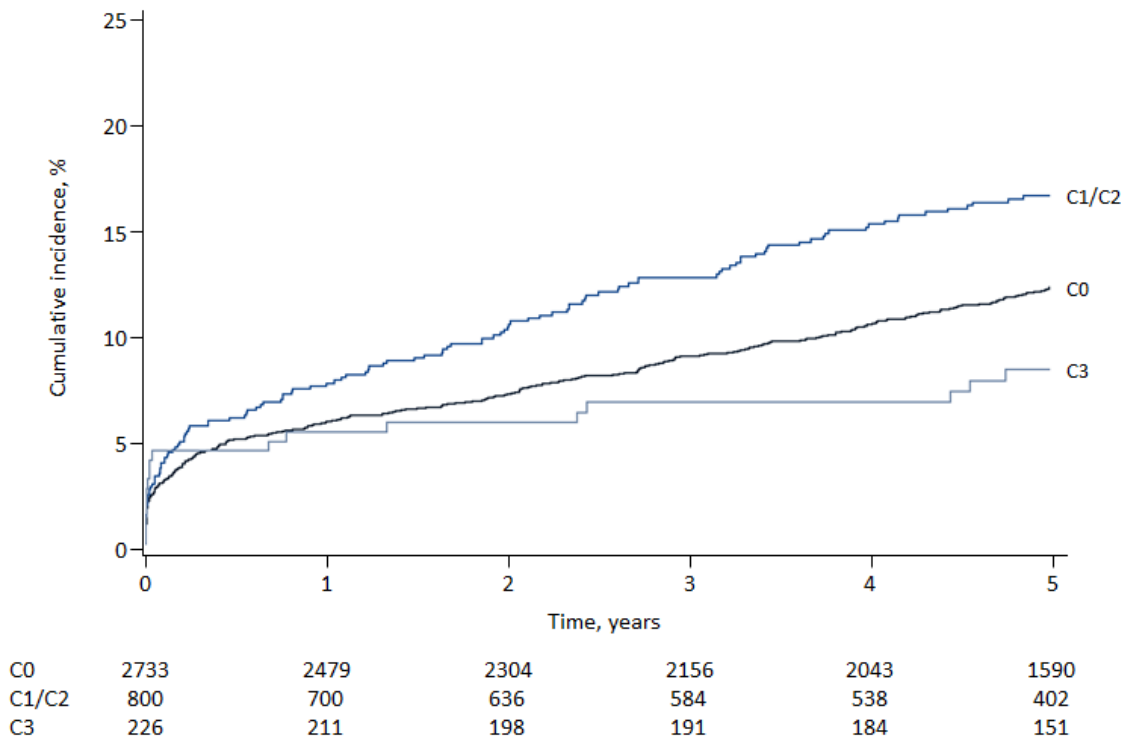

**eFigure 6.** LDL and Blood Pressure Evolution: Cardiac Pathology

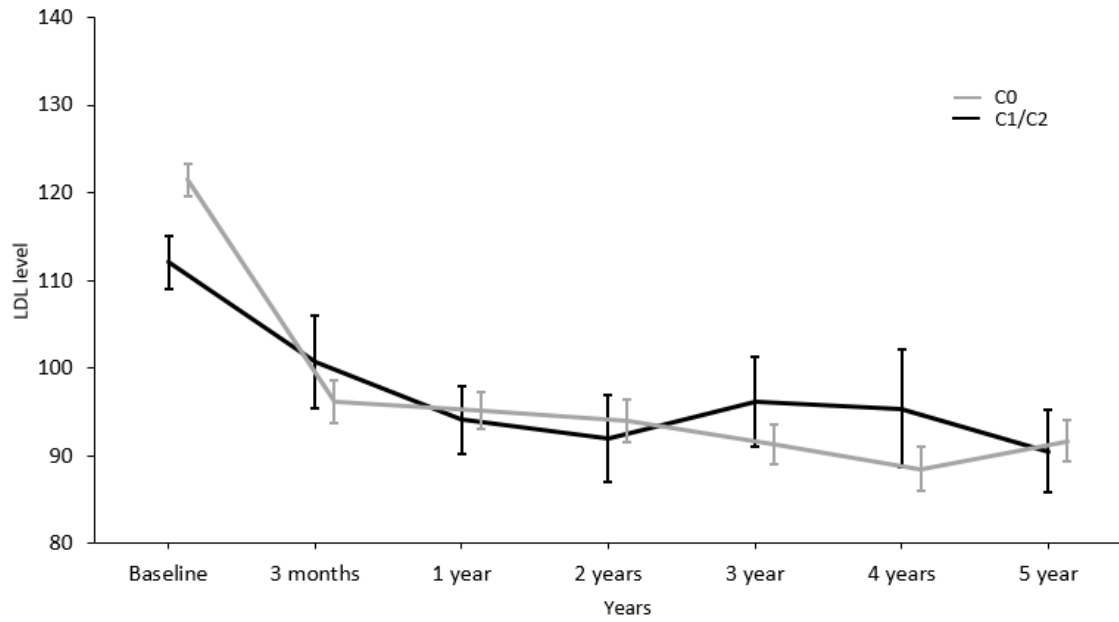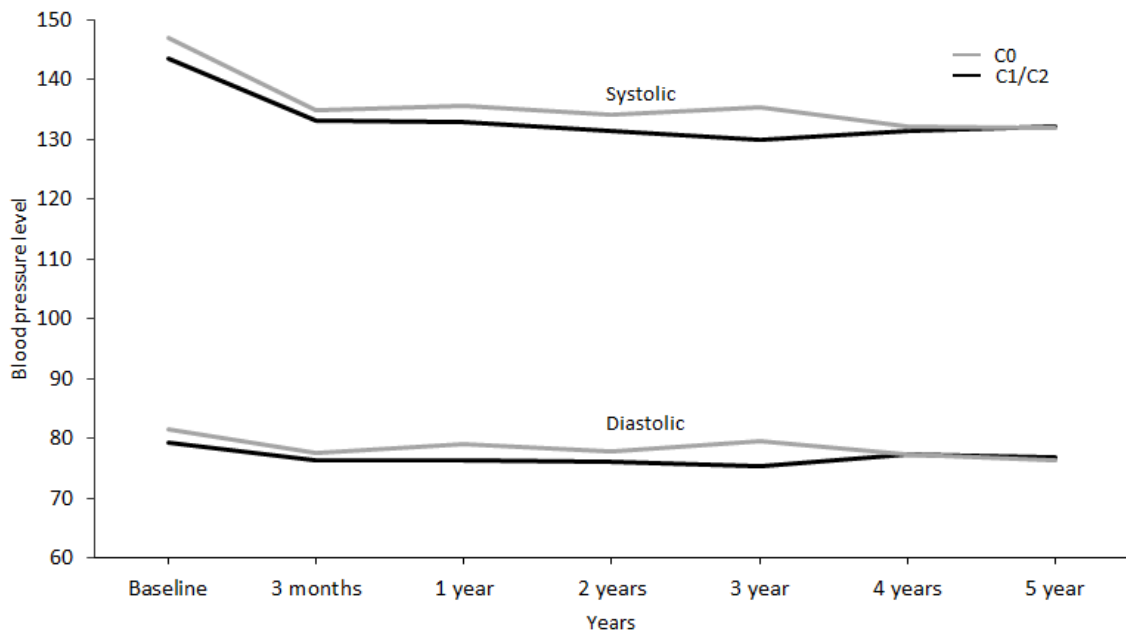

**eFigure 7.** Five-Year Cumulative Incidence of Recurrent Major Cardiovascular Event According to ASCOD Grades O0-D0, O1-D1, or O2-D2 and O3-D3

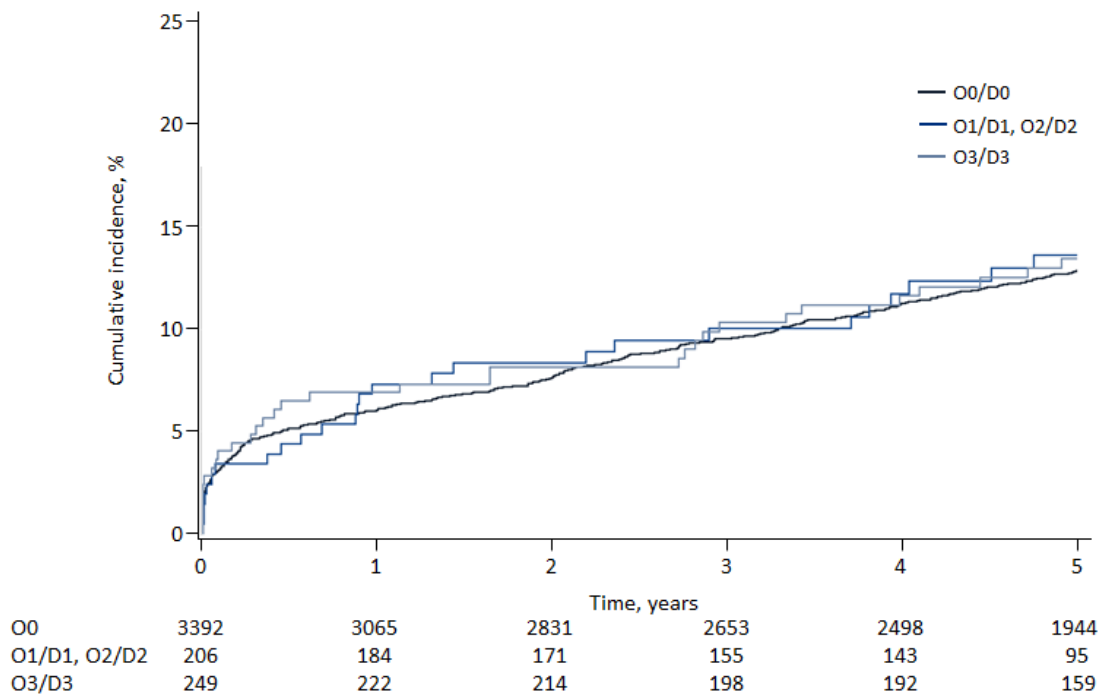

**eFigure 8.** LDL and Blood Pressure Evolution: Other Causes and Dissection

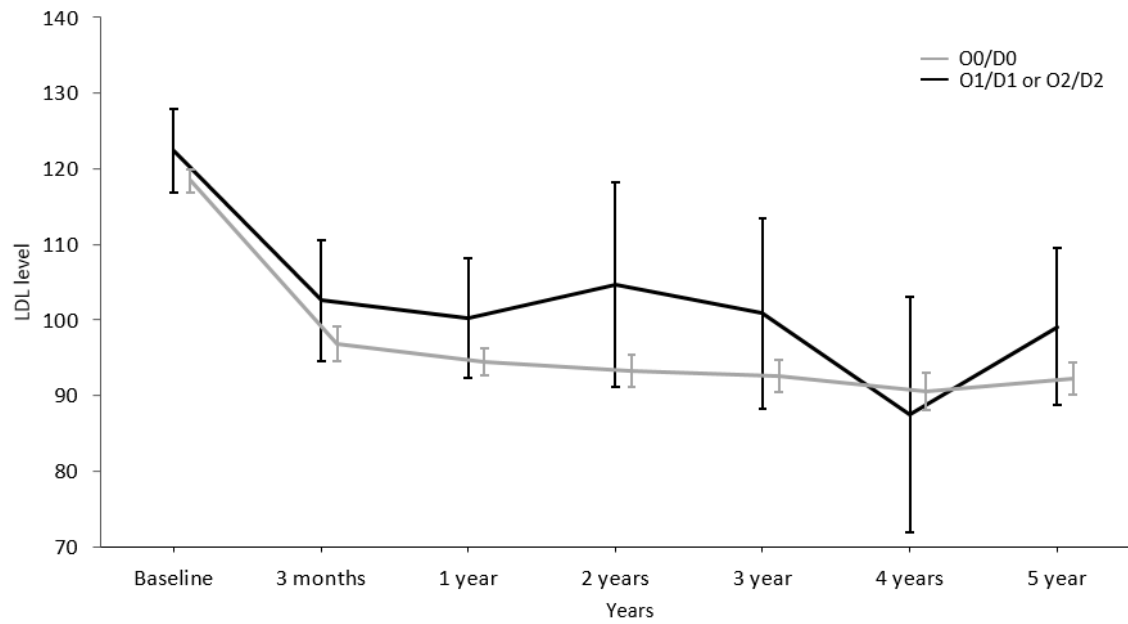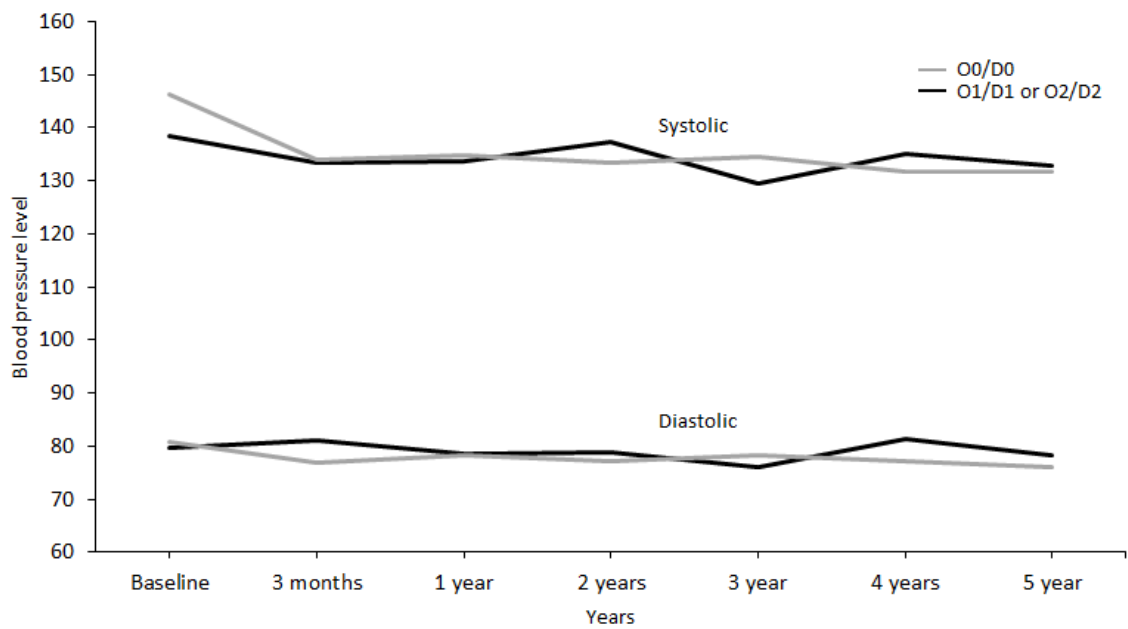



**eFigure 9.** Five-Year Cumulative Incidence of Recurrent Major Cardiovascular Event According to ASCOD Grades A1-A2 and A3, S1-S2 and S3, C1-C2 and C3, O1-O2 and O3, D1-D2 and D3, and A0, S0, C0, O0, or D0

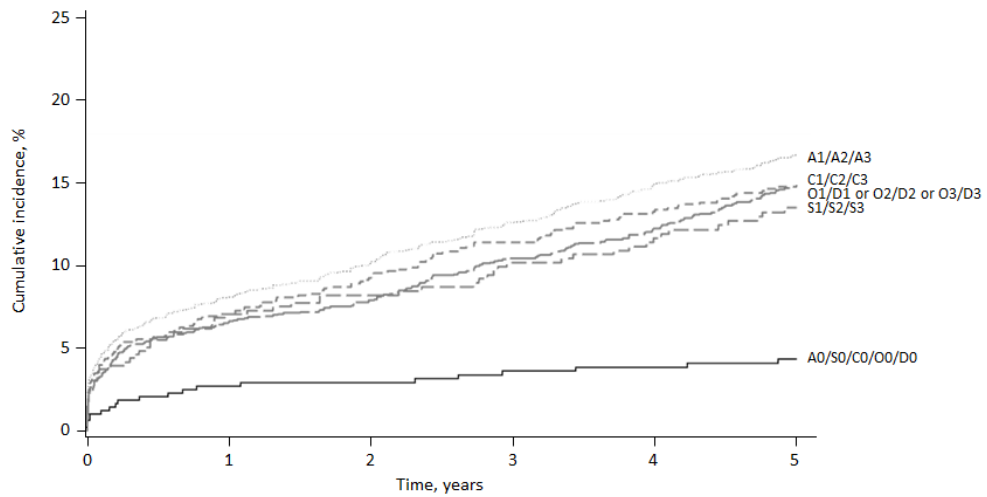

|                         |      |      |      |      |      |      |
|-------------------------|------|------|------|------|------|------|
| A0/S0/C0/O0/D0          | 484  | 458  | 426  | 403  | 391  | 305  |
| A1/A2/A3                | 2106 | 1857 | 1718 | 1586 | 1473 | 1135 |
| S1/S2/S3                | 1685 | 1506 | 1388 | 1282 | 1195 | 932  |
| C1/C2/C3                | 1026 | 911  | 834  | 775  | 722  | 553  |
| O1/D1 or O2/D2 or O3/D3 | 455  | 406  | 385  | 353  | 335  | 254  |

## eMethods 1. ASCOD Phenotyping: Method of Classification<sup>4</sup>

Method of classification<sup>4</sup>

| Grades of diseases |                                                             |
|--------------------|-------------------------------------------------------------|
| 1                  | If the disease is present and can potentially be a cause    |
| 2                  | If the disease is present, but the causal link is uncertain |
| 3                  | If the disease is present, but the causal link is unlikely  |
| 0                  | If the disease is absent                                    |
| 9                  | If the work up is insufficient to grade the disease         |

## eMethods 2. Grades of Predefined ASCOD Phenotypes<sup>4</sup>

### A : Causality grades for Atherothrombosis

|                                                                 |                                                                                                                                                                                                                                                                                                                                                                                                                                                                                                                                                                                                                                        |
|-----------------------------------------------------------------|----------------------------------------------------------------------------------------------------------------------------------------------------------------------------------------------------------------------------------------------------------------------------------------------------------------------------------------------------------------------------------------------------------------------------------------------------------------------------------------------------------------------------------------------------------------------------------------------------------------------------------------|
| <b>A1</b> « Potentially causal »                                | <i>Atherothrombotic stroke</i> defined as:<br>(1) Ipsilateral atherosclerotic stenosis between 50–99% in an intra-/or extracranial artery supplying the ischemic field; <b>or</b><br>(2) Ipsilateral atherosclerotic stenosis <50% in an intra-/or extracranial artery with an endoluminal thrombus supplying the ischemic field; <b>or</b><br>(3) Mobile thrombus in the aortic arch; <b>or</b><br>(4) Ipsilateral arterial occlusion in an intra-/or extracranial artery with evidence of underlying atherosclerotic plaque supplying the ischemic field                                                                             |
| <b>A2</b> “Causal link is uncertain”                            | (1) Ipsilateral atherosclerotic stenosis 30-50% in an intra-/or extracranial artery supplying the ischemic field; <b>or</b> (2) Aortic plaque ≥4 mm without mobile lesion.                                                                                                                                                                                                                                                                                                                                                                                                                                                             |
| <b>A3</b> “Causal link is unlikely, but the disease is present” | (1) Plaque (stenosis <30%) in an intra- or extracranial artery, ipsilateral to the infarct area<br>(2) Aortic plaque <4 mm without mobile thrombus;<br>(3) Stenosis (any degree) or occlusion in a cerebral artery not supplying the infarct area (e.g., contralateral side or opposite circulation)<br>(4) History of myocardial infarction, coronary revascularization or peripheral arterial disease.<br>(5) Ipsi- or bilateral atherosclerotic stenosis 50-99% with bi-hemispheric MR-DWI-lesion                                                                                                                                   |
| <b>A0</b> “Atherosclerosis not detected”                        | <b>Ruling out atherosclerosis:</b><br>(1) Extracranial arterial stenosis: one or several of the following diagnostic tests are performed and negative US-Duplex, CTA, MRA, XRA, or autopsy.<br>(2) Intracranial arterial stenosis: one or several of the following diagnostic tests are performed and are negative: US-TCD, MRA, CTA, XRA, or autopsy.<br>(3) Aortic arch atheroma: TEE with <u>specific assessment</u> of the aortic arch (when the probe is pulled back at the end of the cardiac examination, turn the probe counter clockwise and take time to watch the aortic arch) or specific aortic arch assessment with CTA. |
| <b>A9</b> “Incomplete work-up”                                  | US-Duplex, US-TCD or CTA, or MRA, or XRA or autopsy not performed. [A minimum work-up is extra and intracranial assessment of cerebral arteries – maximum also include transesophageal assessment of the aortic arch (or a default CT angiography of the aortic arch)].                                                                                                                                                                                                                                                                                                                                                                |

### S : Causality grades for Small Vessel Disease

|                                                                 |                                                                                                                                                                                                                                                                                                                                                                                                                                                                                                                                                                                                   |
|-----------------------------------------------------------------|---------------------------------------------------------------------------------------------------------------------------------------------------------------------------------------------------------------------------------------------------------------------------------------------------------------------------------------------------------------------------------------------------------------------------------------------------------------------------------------------------------------------------------------------------------------------------------------------------|
| <b>S1</b> « Potentially causal »                                | Combination of:<br>(1) <i>Lacunar infarction</i> : small deep infarct <15 mm (in perforator branch territory) on MRI-DWI (or a default CT) in an area corresponding to the symptoms <b>and at least one of the three following criteria</b> :<br>(2) one or several small deep <b>older</b> infarct(s) of lacunar type in other territories ; <b>and/or</b><br>(3) severe (confluent –Fazekas III) leukoaraiosis, or microbleeds, or severe dilatation of perivascular spaces (« état criblé »).<br>(4) repeated, recent <-1 month-, TIAs attributable to the same territory as the index infarct |
| <b>S2</b> “Causal link is uncertain”                            | (1) <u>Only one</u> , recent, lacunar infarction and no other abnormality on MRI (or CT) <b>or</b><br>(2) Clinical syndrome suggestive of a deep branch artery stroke, without ischemic lesion in the appropriate area seen on MRI or CT<br>[Main clinical syndrome suggesting a deep branch artery –lacunar– stroke : pure hemiparesis, pure hemi sensory loss, Hemiparesis-ataxy, Dysarthria clumsy hand syndrome, unilateral sensory-motor deficit, others: hemichorea, hemiballism, pure dysarthria, etc.}]                                                                                   |
| <b>S3</b> “Causal link is unlikely, but the disease is present” | Severe (confluent-Fazekas III) leukoaraiosis visible on MRI and/or CT scan, and/or microbleeds visible on T2*-weighted MRI, and/or severe dilatation of perivascular spaces (visible on T2-weighted MRI), and/or one or several old, small deep infarcts of lacunar type                                                                                                                                                                                                                                                                                                                          |
| <b>S0</b> “Small vessel disease not detected”                   | <b>Ruling out small vessel disease stroke:</b> negative MRI (T2, FLAIR, GRE, DWI) and no appropriate clinical syndrome suggestive of a deep branch artery stroke                                                                                                                                                                                                                                                                                                                                                                                                                                  |
| <b>S9</b> “Incomplete work-up”                                  | MRI (or CT) not performed                                                                                                                                                                                                                                                                                                                                                                                                                                                                                                                                                                         |

---

**C : Causality grades for Cardiac pathology**

---

|                                                                 |                                                                                                                                                                                                                                                                                                                                                                                                                                                                                                                                                                                                                                                                                                                                                                                                                                                                                                                                                                                                                                                                                                                                                                      |
|-----------------------------------------------------------------|----------------------------------------------------------------------------------------------------------------------------------------------------------------------------------------------------------------------------------------------------------------------------------------------------------------------------------------------------------------------------------------------------------------------------------------------------------------------------------------------------------------------------------------------------------------------------------------------------------------------------------------------------------------------------------------------------------------------------------------------------------------------------------------------------------------------------------------------------------------------------------------------------------------------------------------------------------------------------------------------------------------------------------------------------------------------------------------------------------------------------------------------------------------------|
| <b>C1</b> « Potentially causal »                                | Cardiogenic stroke defined as acute, or recent and older bi-hemispheric or supra- and infra-tentorial territorial or cortical ischemic lesions and signs of systemic embolism <u>with detection of at least one of the following potential causes:</u><br>(1) Mitral stenosis (surface <1.5 cm <sup>2</sup> ); (2) Mechanical valve; (3) Myocardial infarction within 4 weeks preceding the cerebral infarction;<br>(4) Mural thrombus in the left cavities; (5) Aneurysm of the left ventricle; (6) history or presence of documented atrial fibrillation –whether paroxysmal (>60 sec),, persistent or permanent- or flutter, with or without left atrial thrombus or spontaneous echo;<br>(7) Atrial disease (tachycardia-bradycardia syndrome); (8) Dilated or hypertrophic cardiomyopathies; (9) Left ventricle ejection fraction <35%;<br>(10) Endocarditis; (11) Intracardiac mass; (12) PFO <b>and</b> thrombus in situ;<br>(13) PFO <b>and concomitant</b> pulmonary embolism or proximal DVT <b><u>preceding the index cerebral infarction</u></b><br>(14) Aforementioned cardiac pathologies (C1) with single or without obvious cerebral ischemic lesion |
| <b>C2</b> “Causal link is uncertain”                            | Regardless of stroke pattern: (1) PFO + atrial septal aneurysm, (2) PFO <b>and</b> pulmonary embolism or proximal DTV <b><u>concomitant but NOT preceding</u></b> the index cerebral infarction, (3) intracardiac spontaneous echo-contrast, (4) Apical akinesia of the left ventricle <b>and</b> decreased ejection fraction (but >35%) ; (5) History of Myocardial infarction or palpitation <b>and</b> multiple brain infarction, repeated either bilateral or in two different arterial territories (e.g., both anterior and posterior circulation) ; (6) no direct cardiac source identified, but multiple brain infarction, repeated either bilateral or in two different arterial territories (e.g., both anterior and posterior circulation) and/or evidence of systemic emboli : renal or splenic or mesenteric infarction (on CT, MRI or autopsy) or embolism in peripheral artery supplying arm or leg.                                                                                                                                                                                                                                                   |
| <b>C3</b> “Causal link is unlikely, but the disease is present” | One of the following abnormalities present in isolation: PFO, ASA, strands, mitral annulus calcification, calcification aortic valve, non apical akinesia of the left ventricle, transient atrial fibrillation <60sec, atrial hyperexcitability                                                                                                                                                                                                                                                                                                                                                                                                                                                                                                                                                                                                                                                                                                                                                                                                                                                                                                                      |
| <b>C0</b> “Cardiac pathology not detected or not suspected”     | <b>Ruling out a cardiac source of embolism:</b> minimum is negative ECG and examination by a cardiologist; maximum is negative ECG/telemetry/24-hour Holter ECG/long-term ECG recording (implantable device, transtelephonic ECG, loop recorder) and negative TEE for atrium, valves and septal abnormalities, negative TTE for PFO and assessment of left ventricle, negative cardiac CT/MRI, negative abdominal CT/MRI (search for old or simultaneous subdiaphragmatic visceral infarction)                                                                                                                                                                                                                                                                                                                                                                                                                                                                                                                                                                                                                                                                       |
| <b>C9</b> “Incomplete work-up”                                  | Minimum is ECG and examination by a trained cardiologist in the absence of cardiac imaging                                                                                                                                                                                                                                                                                                                                                                                                                                                                                                                                                                                                                                                                                                                                                                                                                                                                                                                                                                                                                                                                           |

---

---

**O : Causality grades for Other Causes**

---

|                                                                 |                                                                                                                                                                                                                                                                                                                                                                                                                                                                                                                                                                                                |
|-----------------------------------------------------------------|------------------------------------------------------------------------------------------------------------------------------------------------------------------------------------------------------------------------------------------------------------------------------------------------------------------------------------------------------------------------------------------------------------------------------------------------------------------------------------------------------------------------------------------------------------------------------------------------|
| <b>O1</b> "Potentially causal"                                  | (1) Dolichoectasia with complicated aneurysm (2) Polycythemia vera or thrombocytopenia >800 000/mm <sup>3</sup> (3) Systemic Lupus (4) disseminated intravascular coagulation (5) Antiphospholipid antibody syndrome (including >100 GPL units or lupus anticoagulant) (6) Fabry's disease (7) Co-existing meningitis (8) sickle cell disease (9) Ruptured intracranial aneurysm with or without vasospasm of the artery supplying the infarcted area (10) severe hyperhomocysteinemia; (11) Horton's disease; (12) other cerebral inflammatory or infectious aneurysm; (13) Moya-Moya etc.... |
| <b>O2</b> "Causal link is uncertain"                            | (1) Saccular aneurysm (with a suspicion of embolism from it) (2) coincidental migraine attack with neurological deficit lasting >60 min in patients with history of migraine aura                                                                                                                                                                                                                                                                                                                                                                                                              |
| <b>O3</b> "Causal link is unlikely" but the disease is present" | (1) Arterio-venous malformation; (2) thrombocytopenia <800 000/mm <sup>3</sup> , (3) antiphospholipid antibody <100 GPL units (4) homocysteinemia <40 μmol/L (5) malignoma with associated hypercoagulation (high d-dimer levels), deep vein thrombosis or pulmonary embolism and/or recent chemotherapy                                                                                                                                                                                                                                                                                       |
| <b>O0</b> "No other cause detected"                             | <b>Ruling out other causes:</b> negative: cerebrospinal fluid, complete haemostasis, cerebral arterial imaging, family history of inherited disease, inflammatory markers (erythrocyte sedimentation rate, C-reactive protein), hematologic tests (platelet, leucocytes, and eosinophilic counts, hematocrit), specific tests according to the suspected disease (e.g., genetic test, retinal angiography for Susac syndrome)                                                                                                                                                                  |
| <b>O9</b> "Incomplete work-up"                                  | Unable to reasonably exclude other causes based on best available diagnostic tests and stroke specific history                                                                                                                                                                                                                                                                                                                                                                                                                                                                                 |

---

**D : Causality grades for Dissection**

---

|                                                                 |                                                                                                                                                                                                                                                                                                                                                                                                                                                                                                                                                                                                                                                                                                                                                                                          |
|-----------------------------------------------------------------|------------------------------------------------------------------------------------------------------------------------------------------------------------------------------------------------------------------------------------------------------------------------------------------------------------------------------------------------------------------------------------------------------------------------------------------------------------------------------------------------------------------------------------------------------------------------------------------------------------------------------------------------------------------------------------------------------------------------------------------------------------------------------------------|
| <b>D1</b> "Potentially causal"                                  | (1) Arterial dissection by direct demonstration (evidence of mural hematoma: hypersignal on Fat-saturated MRI or at autopsy or on TOF-MRA or CT on axial sections showing both enlargement of the arterial wall by the hematoma with narrowing of the lumen- or on echography showing an hypoechoic arterial wall with narrowing of the lumen and sudden enlargement of the carotid or vertebral (V2) artery diameter.<br>(2) Arterial dissection by indirect demonstration or by less sensitive or less specific diagnostic test (only long arterial stenosis beyond the carotid bifurcation or in V2, V3 or V4 without demonstration of arterial wall hematoma : on X-ray angiography, and/or echography and/or CTA and/or MRA) or unequivocal US with recanalization during follow-up |
| <b>D2</b> "Causal link is uncertain"                            | (1) arterial dissection by weak evidence (suggestive clinical history, e.g., painful Horner's syndrome or past-history of arterial dissection)<br>(2) Imaging evidence of fibromuscular dysplasia of a cerebral artery supplying the ischemic field                                                                                                                                                                                                                                                                                                                                                                                                                                                                                                                                      |
| <b>D3</b> "Causal link is unlikely" but the disease is present" | (1) Kinking or dolichoectasia without complicated aneurysm or plicature,<br>(2) Fibromuscular dysplasia on arteries not supplying the ischemic field;                                                                                                                                                                                                                                                                                                                                                                                                                                                                                                                                                                                                                                    |
| <b>D0</b> "No dissection detected or suspected"                 | <b>Ruling out dissection :</b> negative FAT saturated MRI of suspected artery or good-quality, normal X-ray angiography [too early FAT saturated MRI performed within 3 days of symptom onset can be falsely negative and then should be repeated]. If there is no clinical suspicion of dissection the patient can be classified D0 provided good quality extra-/intra-cranial cerebral arteries and cardiac evaluations have been performed.                                                                                                                                                                                                                                                                                                                                           |
| <b>D9</b> "Incomplete work-up"                                  | In patients aged less than 60 years and no evidence of A1, A2, S1, C1, or O1 category : No FAT saturated MRI performed on the extra or intracranial artery supplying the ischemic field or no X-ray angiography performed ( <u>all performed within 15 days of symptom onset</u> ).                                                                                                                                                                                                                                                                                                                                                                                                                                                                                                      |

---
