# Supplementary material
Source: PubMed Central journal article supplement (PMC10546292)
Supplement: jamaneurol-e233344-s002.pdf [file jamaneurol-e233344-s002.pdf]

\*First name, last name, and suffix (if applicable) are required and will appear in PubMed.

| <b>*Group Name(s): TIAregistry.org Investigators</b> |                   |                              |                  |             |                                          |                                                         |                                                                                            |
|------------------------------------------------------|-------------------|------------------------------|------------------|-------------|------------------------------------------|---------------------------------------------------------|--------------------------------------------------------------------------------------------|
| <b>*First Name and Middle Initial(s)</b>             | <b>*Last Name</b> | <b>*Suffix (eg, Jr, III)</b> | Academic Degrees | Institution | Location (city, state/province, country) | Role or Contribution, eg, chair, principal investigator | Group (if more than 1 Group listed in the byline) and/or Subgroup (eg, Steering Committee) |
| <b>Argentina</b>                                     |                   |                              |                  |             |                                          |                                                         |                                                                                            |
| Sebastian                                            | Ameriso           |                              | MD               |             | Buenos Aires                             | PI                                                      |                                                                                            |
| Claudia                                              | Nora Gandolfo     |                              | MD               |             | Buenos Aires                             | PI                                                      |                                                                                            |
| Guillermo                                            | Povedano          |                              | MD               |             | Buenos Aires                             | PI                                                      |                                                                                            |
| Javier                                               | Sagesse           |                              | MD               |             | Buenos Aires                             | PI                                                      |                                                                                            |
| Heman                                                | Pavon             |                              | MD               |             | Buenos Aires                             | PI                                                      |                                                                                            |
| Jorge                                                | Cancino           |                              | MD               |             | Buenos Aires                             | PI                                                      |                                                                                            |
| Walter                                               | Toledo            |                              | MD               |             | Buenos Aires                             | PI                                                      |                                                                                            |
| <b>China</b>                                         |                   |                              |                  |             |                                          |                                                         |                                                                                            |
| Yinin                                                | Huang             |                              | MD               |             | Beijing                                  | PI                                                      |                                                                                            |
| Xiping                                               | Gong              |                              | MD               |             | Beijing                                  |                                                         |                                                                                            |
| Yeato                                                | Martin            |                              | MD               |             | Beijing                                  |                                                         |                                                                                            |
| Donghu                                               | Mi                |                              | MD               |             | Beijing                                  |                                                         |                                                                                            |
| Tian                                                 | Song              |                              | MD               |             | Beijing                                  |                                                         |                                                                                            |
| Yilong                                               | Wang              |                              | MD               |             | Beijing                                  |                                                         |                                                                                            |
| Yongjun                                              | Wang              |                              | MD               |             | Beijing                                  |                                                         |                                                                                            |
| Fran                                                 | Chandgfend        |                              | MD               |             | Beijing                                  |                                                         |                                                                                            |
| Guo                                                  | Contago           |                              | MD               |             | Beijing                                  |                                                         |                                                                                            |
| Jiao                                                 | Hongyun           |                              | MD               |             | Beijing                                  |                                                         |                                                                                            |
| Heman                                                | Intao             |                              | MD               |             | Beijing                                  |                                                         |                                                                                            |
| Wu                                                   | Jixing            |                              | MD               |             | Beijing                                  |                                                         |                                                                                            |
| Song                                                 | Liquing           |                              | MD               |             | Beijing                                  |                                                         |                                                                                            |
| Tai                                                  | Liwen             |                              | MD               |             | Beijing                                  |                                                         |                                                                                            |
| Liu                                                  | Ran               |                              | MD               |             | Beijing                                  |                                                         |                                                                                            |
| Tian                                                 | Shujuan           |                              | MD               |             | Beijing                                  |                                                         |                                                                                            |
| Liu                                                  | Wenhong           |                              | MD               |             | Beijing                                  |                                                         |                                                                                            |
| Tak                                                  | Hong Soi          |                              | MD               |             | Hong Kong                                | PI                                                      |                                                                                            |
| Lawrence                                             | Wong              |                              | MD               |             | Hong Kong                                | PI                                                      |                                                                                            |
| Liu                                                  | Roxanna           |                              | MD               |             | Hong Kong                                |                                                         |                                                                                            |

## Supplemental Online Content: Nonauthor Collaborators

\*First name, last name, and suffix (if applicable) are required and will appear in PubMed.

| *First Name and Middle Initial(s) | *Last Name  | *Suffix (eg, Jr, III) | Academic Degrees | Institution | Location (city, state/province, country) | Role or Contribution, eg, chair, principal investigator | Group (if more than 1 Group listed in the byline) and/or Subgroup (eg, Steering Committee) |
|-----------------------------------|-------------|-----------------------|------------------|-------------|------------------------------------------|---------------------------------------------------------|--------------------------------------------------------------------------------------------|
| <b>Czech Republic</b>             |             |                       |                  |             |                                          |                                                         |                                                                                            |
| Roman                             | Flasar      |                       | MD               |             | Brno                                     | PI                                                      |                                                                                            |
| Bedriska                          | Ziktova     |                       | MD               |             | Brno                                     |                                                         |                                                                                            |
| Michael                           | Reif        |                       | MD               |             | Brno                                     | PI                                                      |                                                                                            |
| Daniel Sanak                      | Goldemund   |                       | MD               |             | Brno                                     |                                                         |                                                                                            |
| Jiri                              | Neumann     |                       | MD               |             | Chomutov                                 | PI                                                      |                                                                                            |
| Dagmar                            | Svakov      |                       | MD               |             | Chomutov                                 |                                                         |                                                                                            |
| Daniel                            | Sanak       |                       | MD               |             | Oslomouc                                 | PI                                                      |                                                                                            |
| Michael                           | Kral        |                       | MD               |             | Oslomouc                                 |                                                         |                                                                                            |
| David                             | Skoloudik   |                       | MD               |             | Ostrava                                  | PI                                                      |                                                                                            |
| Daniel                            | Vaclavik    |                       | MD               |             | Ostrava                                  |                                                         |                                                                                            |
| Martin                            | Kuhila      |                       | MD               |             | Ostrava                                  |                                                         |                                                                                            |
| <b>France</b>                     |             |                       |                  |             |                                          |                                                         |                                                                                            |
| Pierre                            | Amarenco    |                       | MD               |             | Paris                                    | PI                                                      |                                                                                            |
| Lucie                             | Cabrejo     |                       | MD               |             | Paris                                    |                                                         |                                                                                            |
| Céline                            | Guidoux     |                       | MD               |             | Paris                                    |                                                         |                                                                                            |
| Cristina Maria                    | Hobeanu     |                       | MD               |             | Paris                                    |                                                         |                                                                                            |
| Philippa                          | Lavallée    |                       | MD               |             | Paris                                    |                                                         |                                                                                            |
| Elena                             | Meseguer    |                       | MD               |             | Paris                                    |                                                         |                                                                                            |
| <b>Germany</b>                    |             |                       |                  |             |                                          |                                                         |                                                                                            |
| Henrich                           | Audebert    |                       | MD               |             | Berlin                                   | PI                                                      |                                                                                            |
| Daniel                            | Menger      |                       | MD               |             | Berlin                                   |                                                         |                                                                                            |
| Wofgang                           | Heide       |                       | MD               |             | Celle                                    | PI                                                      |                                                                                            |
| Saskia                            | Lipp        |                       | MD               |             | Celle                                    |                                                         |                                                                                            |
| Huriye                            | Ozalp       |                       | MD               |             | Celle                                    |                                                         |                                                                                            |
| Christine                         | Sctzmann    |                       | MD               |             |                                          |                                                         |                                                                                            |
| Christian                         | Weimar      |                       | MD               |             | Essen                                    | PI                                                      |                                                                                            |
| Katharina                         | Platzbecker |                       | MD               |             | Essen                                    |                                                         |                                                                                            |

## Supplemental Online Content: Nonauthor Collaborators

\*First name, last name, and suffix (if applicable) are required and will appear in PubMed.

| *First Name and Middle Initial(s) | *Last Name   | *Suffix (eg, Jr, III) | Academic Degrees | Institution | Location (city, state/province, country) | Role or Contribution, eg, chair, principal investigator | Group (if more than 1 Group listed in the byline) and/or Subgroup (eg, Steering Committee) |
|-----------------------------------|--------------|-----------------------|------------------|-------------|------------------------------------------|---------------------------------------------------------|--------------------------------------------------------------------------------------------|
| Peter                             | Ringleb      |                       | MD               |             | Heidelberg                               | PI                                                      |                                                                                            |
| Michel G                          | Hennerici    |                       | MD               |             | Mannheim                                 | PI                                                      |                                                                                            |
| Martin                            | Griebe       |                       | MD               |             | Mannheim                                 |                                                         |                                                                                            |
| Katrin                            | Knoll Olaf   |                       | MD               |             | Mannheim                                 |                                                         |                                                                                            |
| Olaf                              | Willmann     |                       | MD               |             | Mannheim                                 |                                                         |                                                                                            |
| Juergen                           | Harmut Faiss |                       | MD               |             | Teupitz                                  | PI                                                      |                                                                                            |
| Susan                             | Dilan        |                       | MD               |             | Teupitz                                  |                                                         |                                                                                            |
| Anja                              | Kobersteain  |                       | MD               |             | Teupitz                                  |                                                         |                                                                                            |
| Katarina                          | Krimmer      |                       | MD               |             | Teupitz                                  |                                                         |                                                                                            |
| Sandra                            | Tietz        |                       | MD               |             | Teupitz                                  |                                                         |                                                                                            |
| Peter                             | Wienecke     |                       | MD               |             | Teupitz                                  |                                                         |                                                                                            |
| Gerhard                           | Hamann       |                       | MD               |             | Wiessbaden                               | PI                                                      |                                                                                            |
| Nico                              | Burkhardt    |                       | MD               |             | Wiessbaden                               |                                                         |                                                                                            |
| Martin                            | Liebetau     |                       | MD               |             | Wiessbaden                               |                                                         |                                                                                            |
| Nadine                            | Mueller      |                       | MD               |             | Wiessbaden                               |                                                         |                                                                                            |
| Michaela                          | Wagner       |                       | MD               |             | Wiessbaden                               |                                                         |                                                                                            |
|                                   |              |                       |                  |             |                                          |                                                         |                                                                                            |
| <b>India</b>                      |              |                       |                  |             |                                          |                                                         |                                                                                            |
| Dr                                | Strivastava  |                       | MD               |             | New Delhi                                |                                                         |                                                                                            |
|                                   |              |                       |                  |             |                                          |                                                         |                                                                                            |
| <b>Ireland</b>                    |              |                       |                  |             |                                          |                                                         |                                                                                            |
| Peter                             | Kelly        |                       | MD               |             | Dublin                                   | PI                                                      |                                                                                            |
|                                   |              |                       |                  |             |                                          |                                                         |                                                                                            |
| <b>Israel</b>                     |              |                       |                  |             |                                          |                                                         |                                                                                            |
| Hashomer David                    | Tanne        |                       | MD               |             | Tel Aviv                                 | PI                                                      |                                                                                            |
|                                   |              |                       |                  |             |                                          |                                                         |                                                                                            |
| <b>Italy</b>                      |              |                       |                  |             |                                          |                                                         |                                                                                            |
| Milena                            | Cavazzuti    |                       | MD               |             | Emilia Romana                            | PI                                                      |                                                                                            |
| Sabrina                           | Anticoli     |                       | MD               |             | Modena                                   | pi                                                      |                                                                                            |
| Danilo                            | Toni         |                       | MD               |             | Roma                                     | PI                                                      |                                                                                            |
| <b>Japan</b>                      |              |                       |                  |             |                                          |                                                         |                                                                                            |

## Supplemental Online Content: Nonauthor Collaborators

\*First name, last name, and suffix (if applicable) are required and will appear in PubMed.

| *First Name and Middle Initial(s) | *Last Name | *Suffix (eg, Jr, III) | Academic Degrees | Institution | Location (city, state/province, country) | Role or Contribution, eg, chair, principal investigator | Group (if more than 1 Group listed in the byline) and/or Subgroup (eg, Steering Committee) |
|-----------------------------------|------------|-----------------------|------------------|-------------|------------------------------------------|---------------------------------------------------------|--------------------------------------------------------------------------------------------|
| Ken                               | Nagata     |                       | MD               |             | Akita                                    | PI                                                      |                                                                                            |
| Yasushi                           | Okada      |                       | MD               |             | Fukuoka                                  | PI                                                      |                                                                                            |
| Hiroshi                           | Yamagami   |                       | MD               |             | Kobe                                     | PI                                                      |                                                                                            |
| Kazuo                             | Minematsu  |                       | MD               |             | Osaka                                    | PI                                                      |                                                                                            |
| Jojo                              | Nakagawara |                       | MD               |             | Sapporo                                  | PI                                                      |                                                                                            |
| Shinchiro                         | Uchiyama   |                       | MD               |             | Tokyo                                    | PI                                                      |                                                                                            |
|                                   |            |                       |                  |             |                                          |                                                         |                                                                                            |
| <b>Korea</b>                      |            |                       |                  |             |                                          |                                                         |                                                                                            |
| Byung                             | Chui Lee   |                       | MD               |             | Anyand-Si                                | PI                                                      |                                                                                            |
| Byung                             | Woo Yoon   |                       | MD               |             | Anyand-Si                                | PI                                                      |                                                                                            |
| Ji                                | Hoe        |                       | MD               |             | Seoul                                    | PI                                                      |                                                                                            |
| Jong                              | Moo Park   |                       | MD               |             | Seoul                                    | PI                                                      |                                                                                            |
|                                   |            |                       |                  |             |                                          |                                                         |                                                                                            |
| <b>Lebanon</b>                    |            |                       |                  |             |                                          |                                                         |                                                                                            |
| Halim                             | Abboud     |                       | MD               |             | Beirut                                   | PI                                                      |                                                                                            |
| Salam                             | Koussa     |                       | MD               |             | Beirut                                   |                                                         |                                                                                            |
| Adnan                             | Awada      |                       | MD               |             |                                          |                                                         |                                                                                            |
|                                   |            |                       |                  |             |                                          |                                                         |                                                                                            |
| <b>Malaysia</b>                   |            |                       |                  |             |                                          |                                                         |                                                                                            |
| Kay                               | Sin Tan    |                       | MD               |             | Kuala Lumpur                             | PI                                                      |                                                                                            |
|                                   |            |                       |                  |             |                                          |                                                         |                                                                                            |
| <b>Mexico</b>                     |            |                       |                  |             |                                          |                                                         |                                                                                            |
| Antonio                           | Arauz      |                       | MD               |             | Mexico                                   | PI                                                      |                                                                                            |
| Ernando                           | Gongora    |                       | MD               |             | Mexico                                   | PI                                                      |                                                                                            |
| Adrian Infante                    | Valenzuela |                       | MD               |             | Mexico                                   | PI                                                      |                                                                                            |
| Juan M.                           | Esamilla   |                       | MD               |             | Mexico                                   |                                                         |                                                                                            |
|                                   |            |                       |                  |             |                                          |                                                         |                                                                                            |
| <b>Portugal</b>                   |            |                       |                  |             |                                          |                                                         |                                                                                            |
| Patricia                          | Canhao     |                       | MD               |             | Lisbon                                   | PI                                                      |                                                                                            |
| *****_                            | Ferro      |                       | MD               |             | Lisbon                                   |                                                         |                                                                                            |
| Ana Catarina                      | Fonseca    |                       | MD               |             | Lisbon                                   |                                                         |                                                                                            |

## Supplemental Online Content: Nonauthor Collaborators

\*First name, last name, and suffix (if applicable) are required and will appear in PubMed.

| *First Name and Middle Initial(s) | *Last Name | *Suffix (eg, Jr, III) | Academic Degrees | Institution | Location (city, state/province, country) | Role or Contribution, eg, chair, principal investigator | Group (if more than 1 Group listed in the byline) and/or Subgroup (eg, Steering Committee) |
|-----------------------------------|------------|-----------------------|------------------|-------------|------------------------------------------|---------------------------------------------------------|--------------------------------------------------------------------------------------------|
| Manuel                            | Correia    |                       | MD               |             | Porto                                    | PI                                                      |                                                                                            |
| Assuncao                          | Tuna       |                       | MD               |             | Porto                                    |                                                         |                                                                                            |
| <b>Serbia</b>                     |            |                       |                  |             |                                          |                                                         |                                                                                            |
| Nada                              | Sternic    |                       | MD               |             | Belgrade                                 | PI                                                      |                                                                                            |
| Milija                            | Mijajlovic |                       | MD               |             | Aleksandra Pavlovic                      |                                                         |                                                                                            |
| <b>Slovakia</b>                   |            |                       |                  |             |                                          |                                                         |                                                                                            |
| Beata                             | Dupejova   |                       | MD               |             | Banska Bystrica                          | PI                                                      |                                                                                            |
| Jana                              | Szedelyova |                       | MD               |             | Banska Bystrica                          |                                                         |                                                                                            |
| Renata                            | Smirkova   |                       | MD               |             | Krompachy                                |                                                         |                                                                                            |
| <b>Spain</b>                      |            |                       |                  |             |                                          |                                                         |                                                                                            |
| Tomas                             | Segura     |                       | MD               |             | Albacete                                 | PI                                                      |                                                                                            |
| Carlos                            | Molina     |                       | MD               |             | Barcelona                                | PI                                                      |                                                                                            |
| Ana                               | Rodriguez  |                       | MD               |             | Barcelona                                | PI                                                      |                                                                                            |
| Yolanda                           | Silva      |                       | MD               |             | Girona                                   | PI                                                      |                                                                                            |
| Javier                            | Tejada     |                       | MD               |             | Leon                                     | PI                                                      |                                                                                            |
| Francisco                         | Purroy     |                       | MD               |             | Lleida                                   | PI                                                      |                                                                                            |
| Jaime                             | Masjuan    |                       | MD               |             | Madrid                                   | PI                                                      |                                                                                            |
| Jose                              | Vivancos   |                       | MD               |             | Madrid                                   | PI                                                      |                                                                                            |
| Ernest                            | Palomeras  |                       | MD               |             | Mataro                                   | PI                                                      |                                                                                            |
| Miguel Angel                      | Gamemro    |                       | MD               |             | Sevilla                                  | PI                                                      |                                                                                            |
| JF                                | Arenillas  |                       | MD               |             | Valladolid                               | PI                                                      |                                                                                            |
| Anna                              | Calleja    |                       | MD               |             | Valladolid                               | PI                                                      |                                                                                            |
| Esther                            | Rojo       |                       | MD               |             | Valladolid                               | PI                                                      |                                                                                            |
| <b>UK</b>                         |            |                       |                  |             |                                          |                                                         |                                                                                            |
| Alastair                          | Buchan     |                       | MD               |             | Oxford                                   | PI                                                      |                                                                                            |
| Peter                             | Rothwell   |                       | MD               |             | Oxford                                   | PI                                                      |                                                                                            |

## Supplemental Online Content: Nonauthor Collaborators

\*First name, last name, and suffix (if applicable) are required and will appear in PubMed.

| *First Name and Middle Initial(s) | *Last Name | *Suffix (eg, Jr, III) | Academic Degrees | Institution | Location (city, state/province, country) | Role or Contribution, eg, chair, principal investigator | Group (if more than 1 Group listed in the byline) and/or Subgroup (eg, Steering Committee) |
|-----------------------------------|------------|-----------------------|------------------|-------------|------------------------------------------|---------------------------------------------------------|--------------------------------------------------------------------------------------------|
| <b>Taiwan</b>                     |            |                       |                  |             |                                          |                                                         |                                                                                            |
| Tsong                             | Hai Lee    |                       | MD               |             | Kuei Shan                                | PI                                                      |                                                                                            |
| Ku Chou                           | Chang      |                       | MD               |             | Kuei Shan                                | PI                                                      |                                                                                            |
| Yu-Ching                          | Huang      |                       | MD               |             | Kuei Shan                                |                                                         |                                                                                            |
| Ruey-Tay                          | Lin        |                       | MD               |             | Kaoshiung                                | PI                                                      |                                                                                            |
| Somsak                            | Timkao     |                       | MD               |             | Khon Kaen                                | PI                                                      |                                                                                            |
