# Supplementary material
Source: PubMed Central journal article supplement (PMC10546292)
Supplement: jamaneurol-e233344-s003.pdf [file jamaneurol-e233344-s003.pdf]

## Data Sharing Statement

Lavallée. Underlying Causes of TIA and Minor Ischemic Stroke and Risk of Major Vascular Events. *JAMA Neurol.* Published October 02, 2023. doi:10.1001/jamaneurol.2023.3344

### Data

**Data available:** Yes

**Data types:** Other (please specify)

**Additional Information:** Data of this registry comes from TIAregistry.org, an online case report form with restricted access. The authors will consider data sharing requests on a case-by-case basis. Interested persons can contact the corresponding author (Pierre Amarenco) for further information

**How to access data:** Data of this registry comes from TIAregistry.org, an online case report form with restricted access. The authors will consider data sharing requests on a case-by-case basis. Interested persons can contact the corresponding author (Pierre Amarenco) for further information

**When available:** With publication

### Supporting Documents

**Document types:** Statistical/analytic code

**How to access documents:** Interested persons can contact the corresponding author (Pierre Amarenco) for further information

**When available:** With publication

### Additional Information

**Who can access the data:** Interested persons can contact the corresponding author (Pierre Amarenco) for further information

**Types of analyses:** For any purpose

**Mechanisms of data availability:** after approval of a proposal

**Any additional restrictions:** none
